# Supplementary material for: Design and Synthesis of a Novel 4-aryl-N-(2-alkoxythieno [2,3-b]pyrazine-3-yl)-4-arylpiperazine-1-carboxamide DGG200064 Showed Therapeutic Effect on Colon Cancer through G2/M Arrest
Source: MDPI journal article supplement (doi:10.3390/ph15050502), 2022-04-20
Supplement: s1 [file s1]

## Supplementary Materials

### Contents

|                                                                                                                      |    |
|----------------------------------------------------------------------------------------------------------------------|----|
| 1. $^1\text{H}$ NMR, $^{13}\text{C}$ NMR, LC/MS, and HRMS Spectra of Compounds.....                                  | 2  |
| 2. Figures S1 and S2.....                                                                                            | 40 |
| 3. Raw Biological Data .....                                                                                         | 41 |
| Table S1. <i>In vivo</i> evaluation of the DGG200066 suppressed colon cancer tumor growth against HCT1116 cells..... | 56 |

# 1. <sup>1</sup>H NMR, <sup>13</sup>C NMR, LC/MS, and HRMS Spectra of Compounds

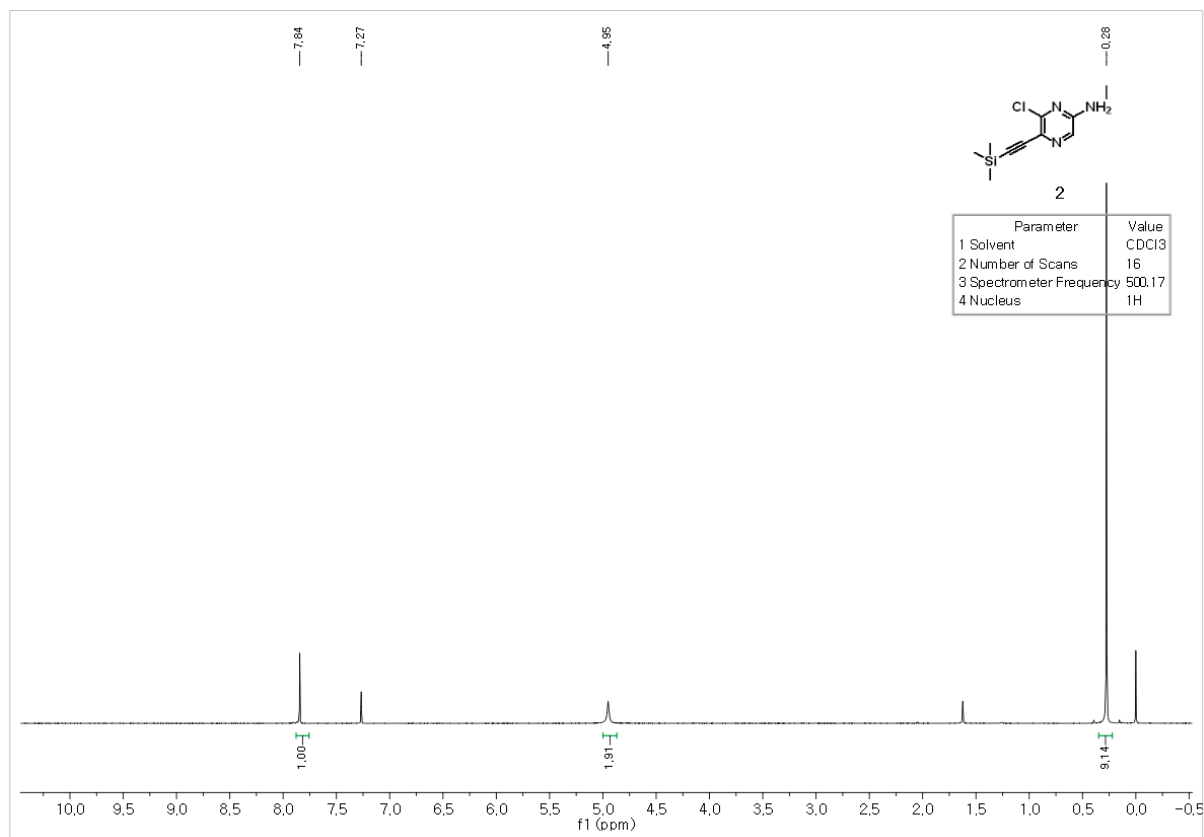

<sup>1</sup>H-NMR-2

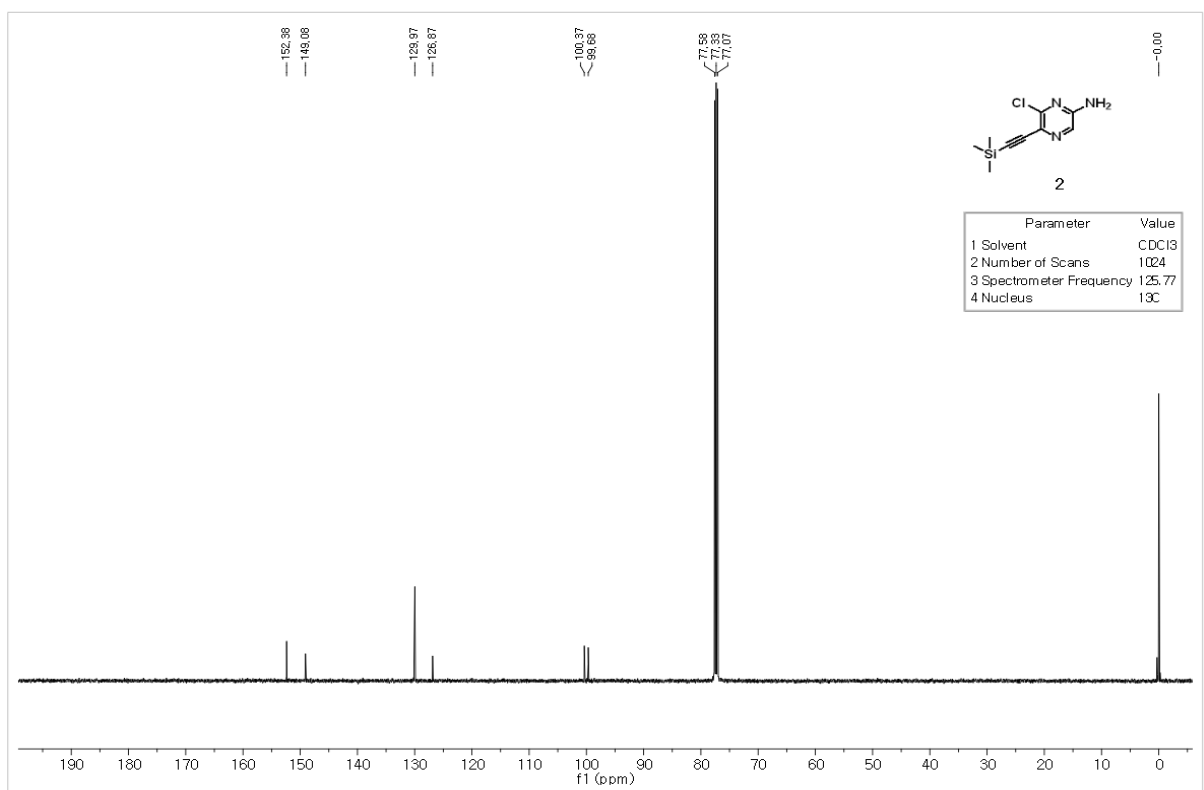

<sup>13</sup>C-NMR-2

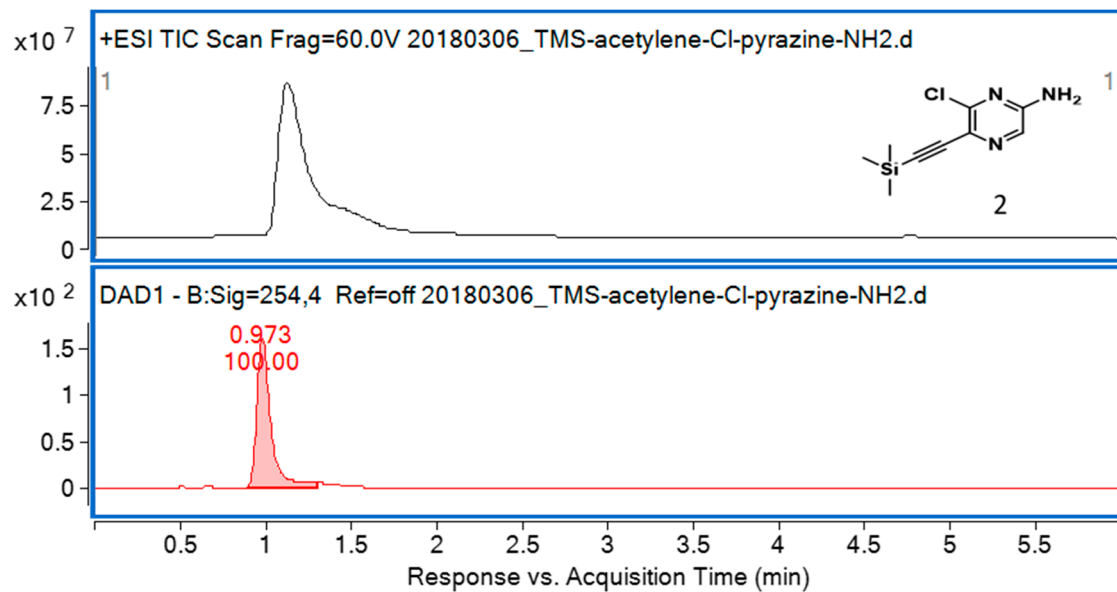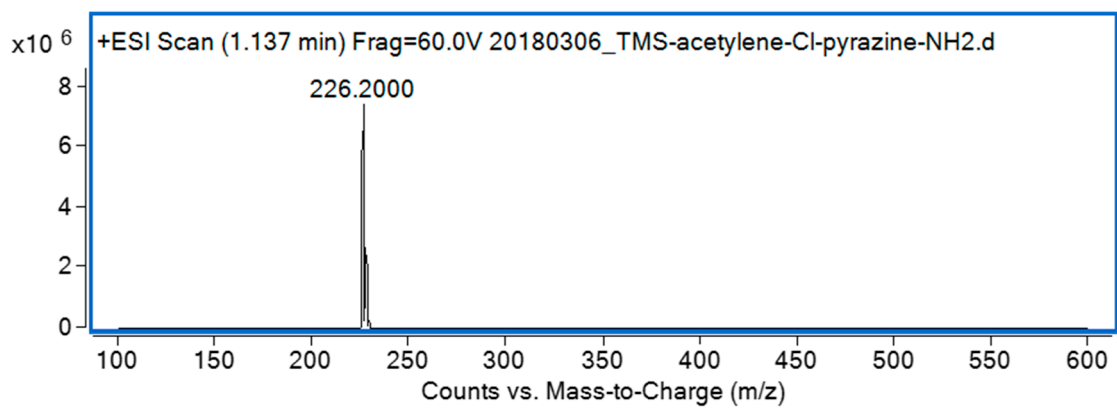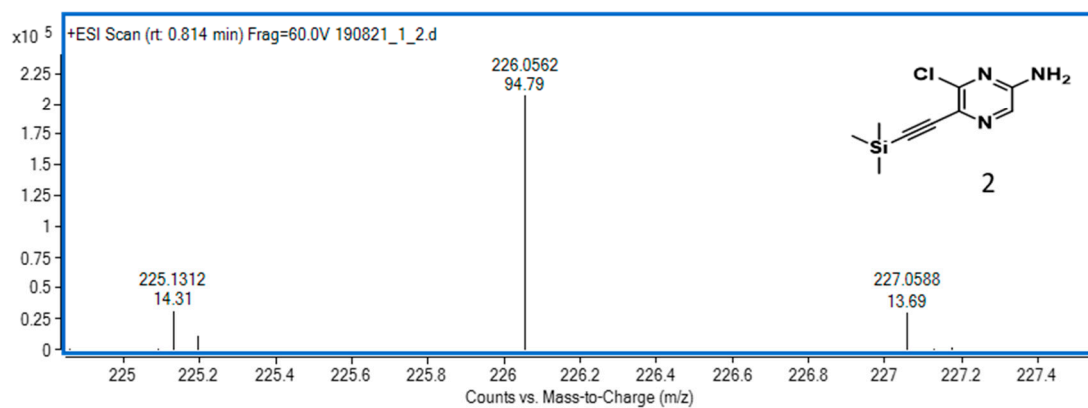

LC/MS, HR/MS-2

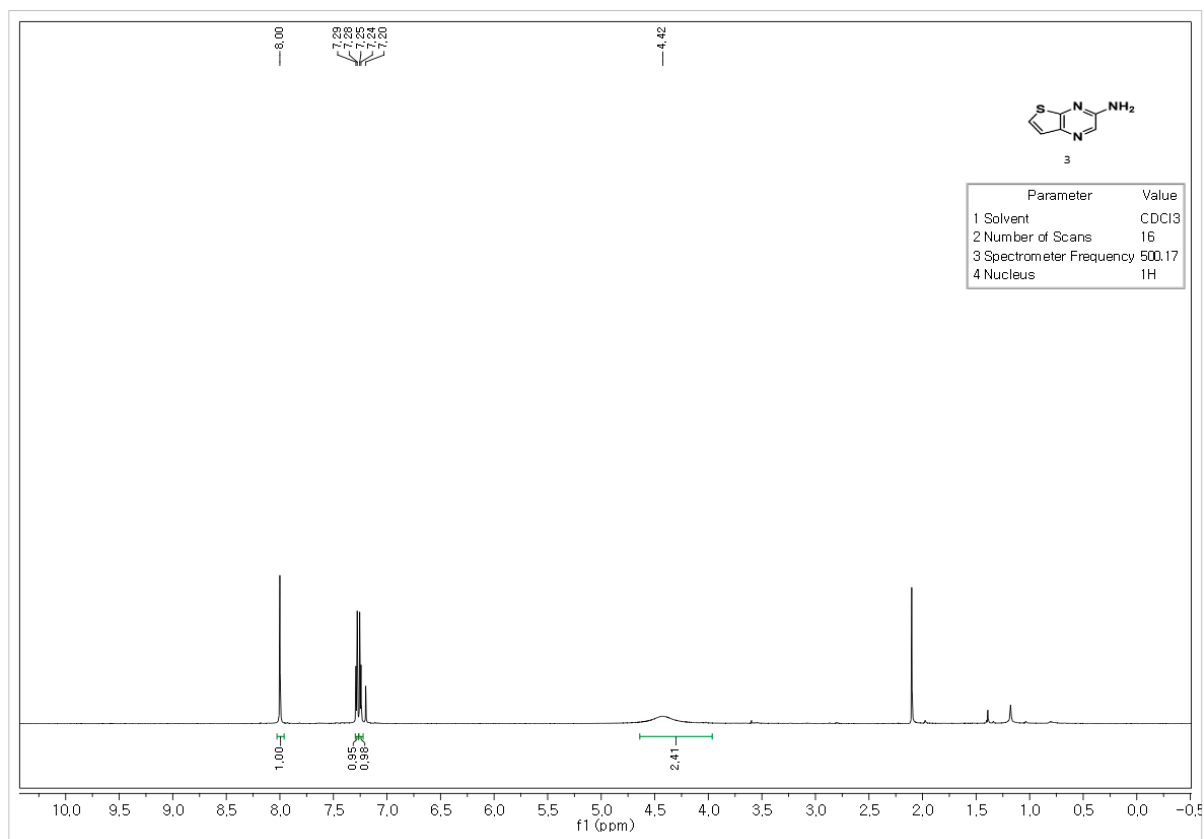

**<sup>1</sup>H-NMR-3**

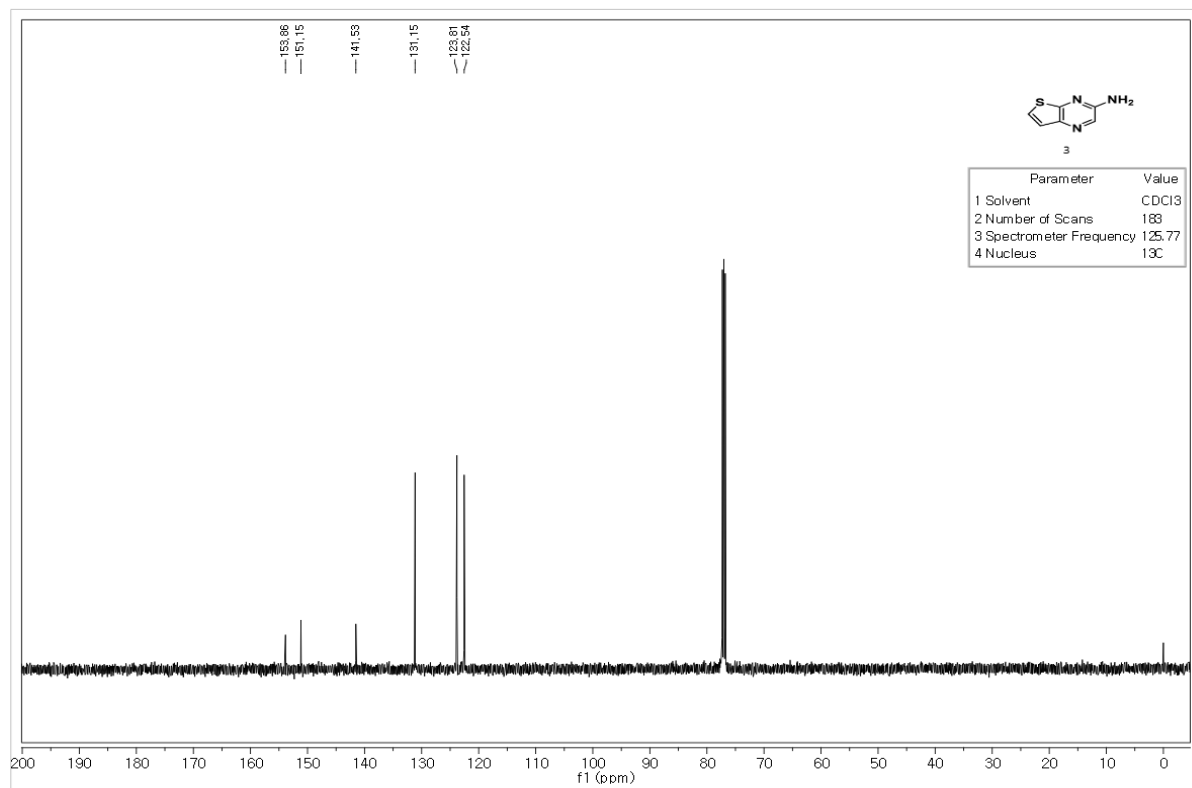

**<sup>13</sup>C-NMR-3**



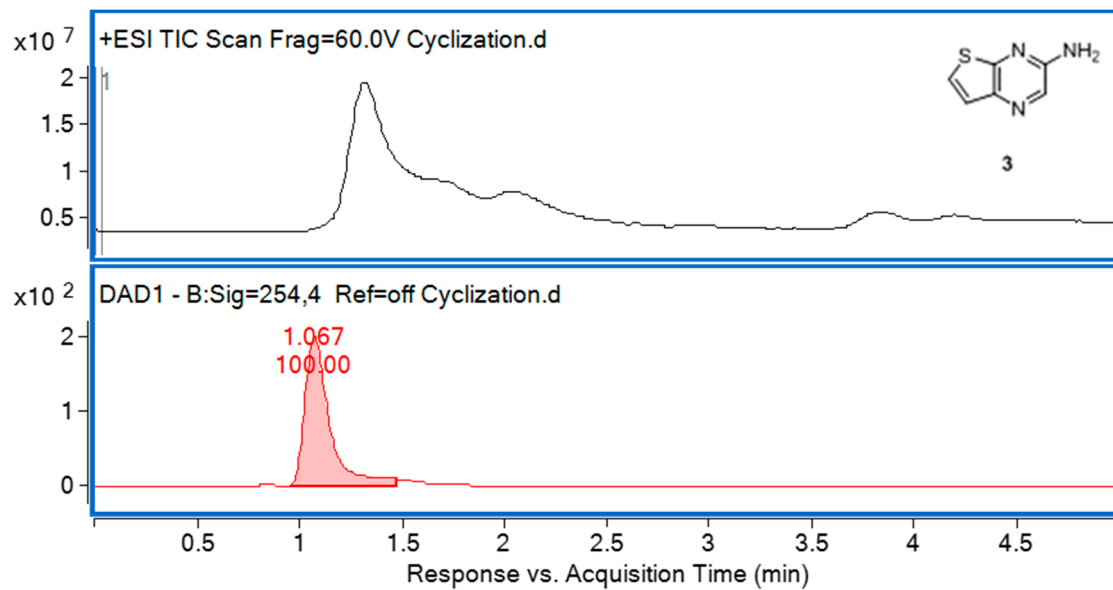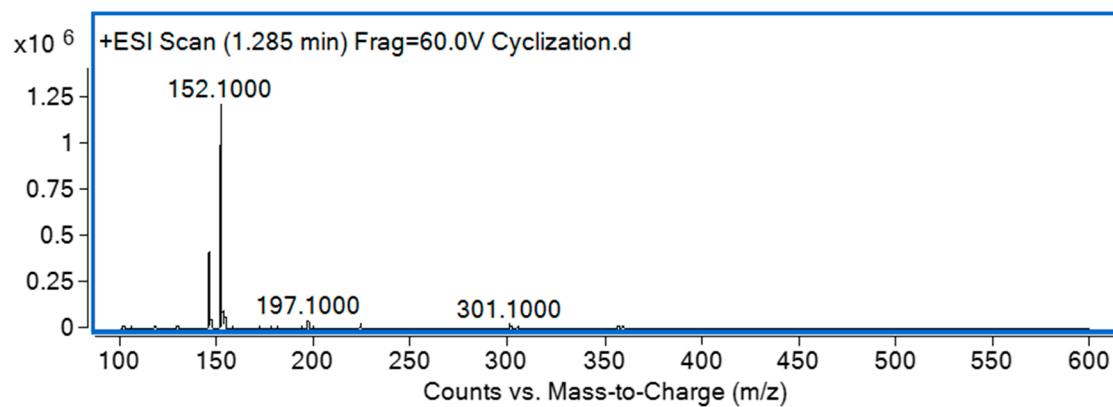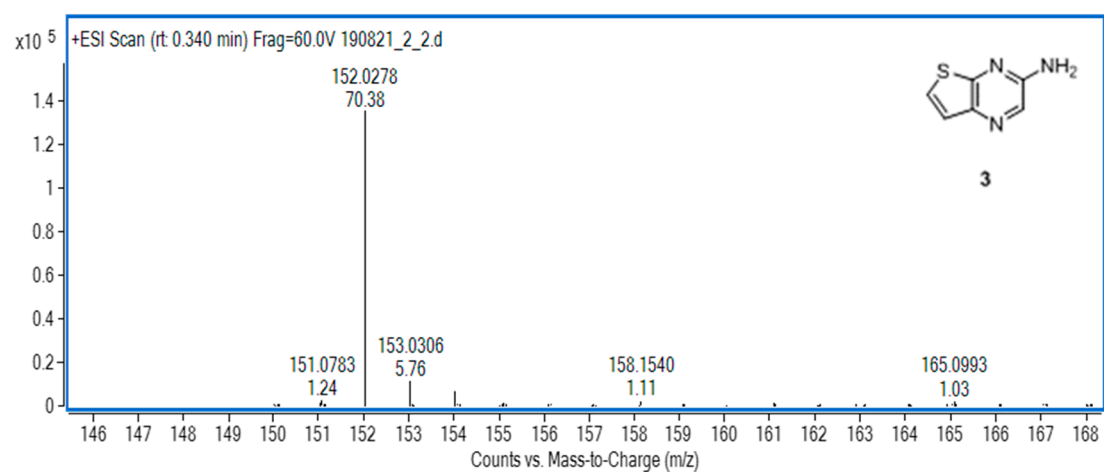

### LC/MS, HR/MS-3

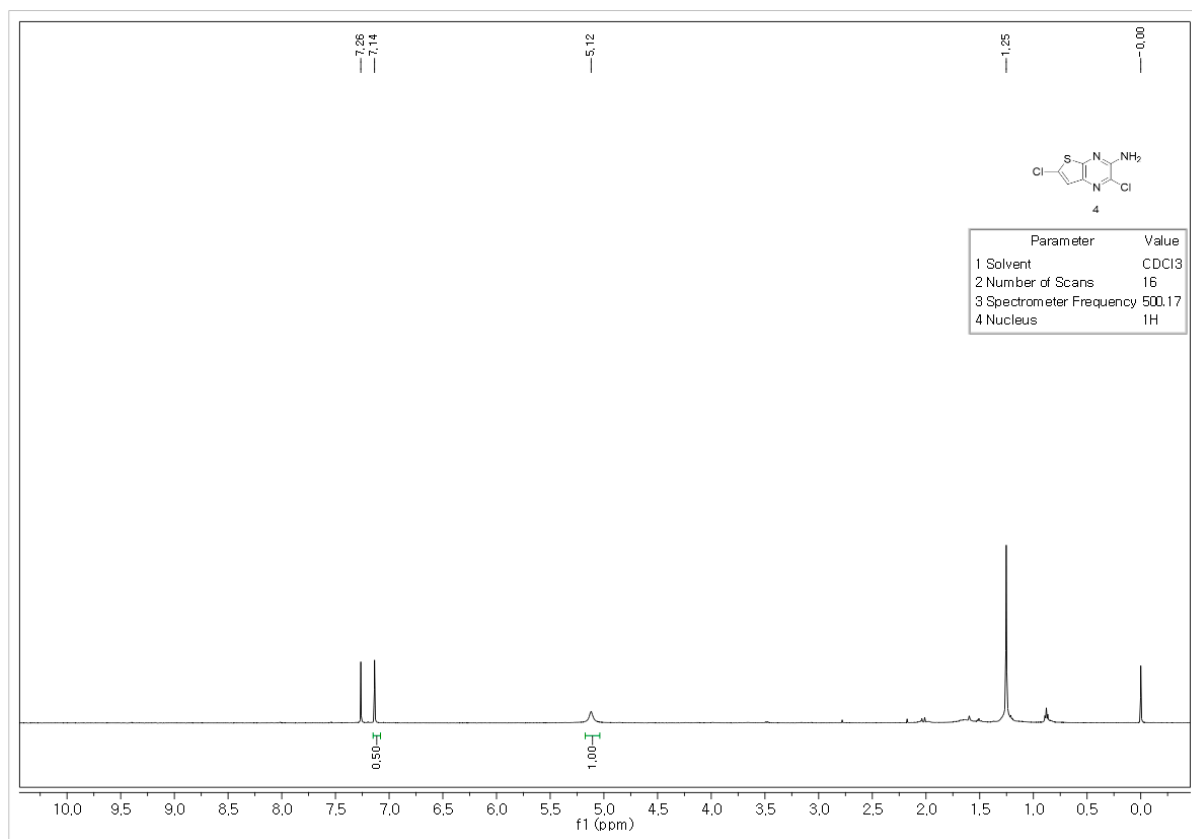

**<sup>1</sup>H-NMR-4**

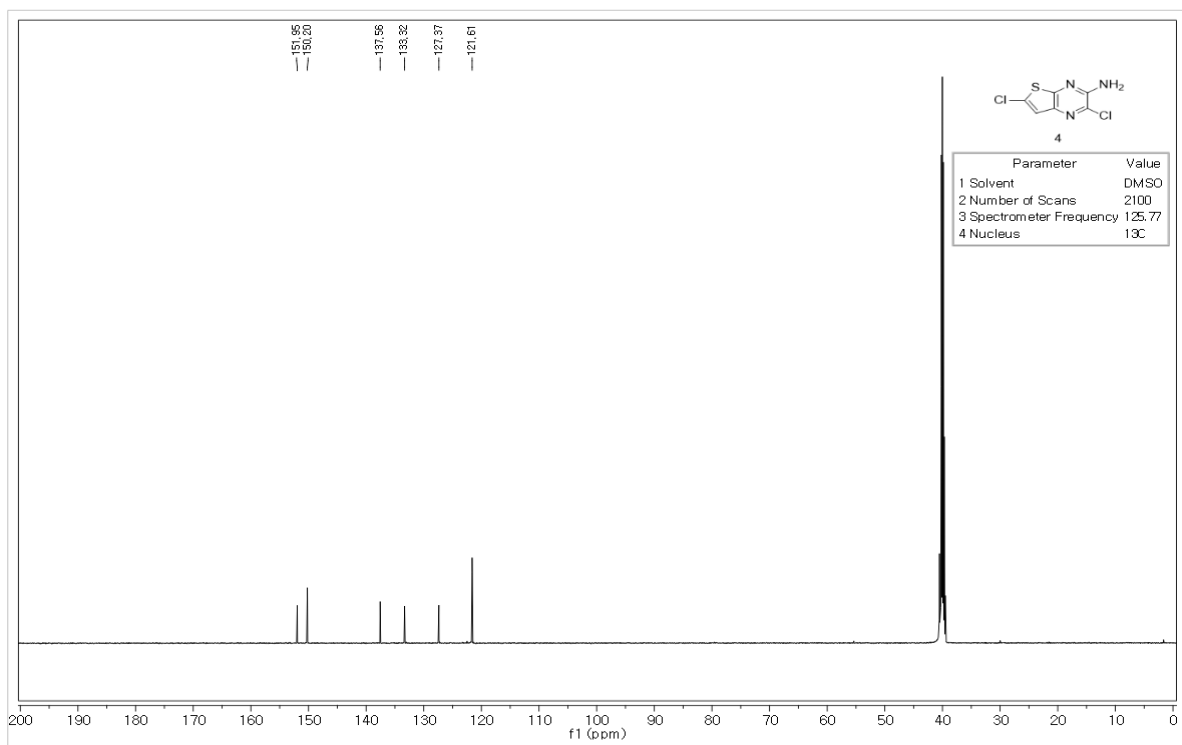

**<sup>13</sup>C-NMR-4**

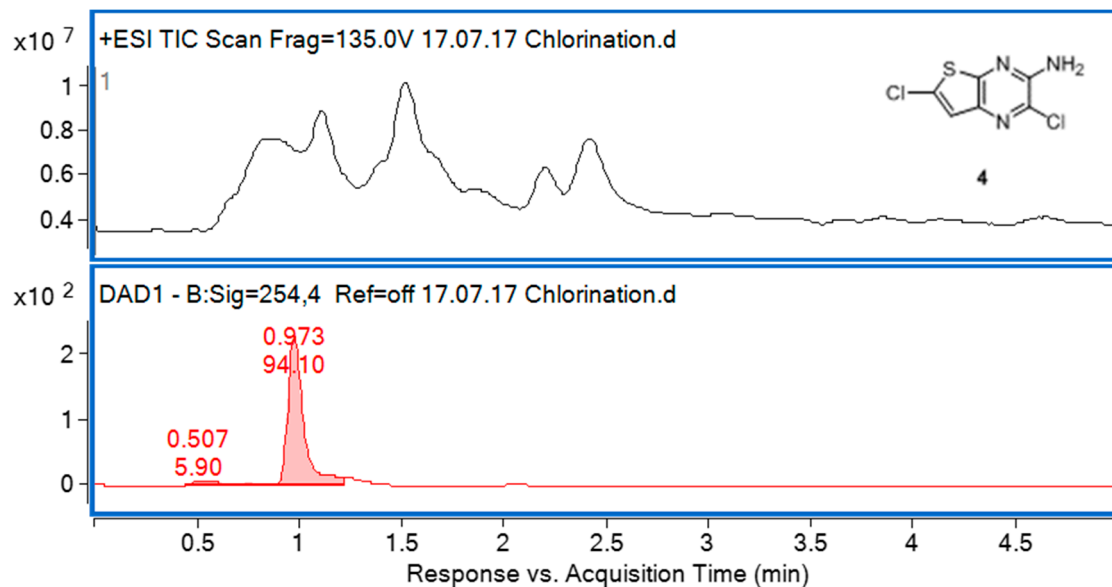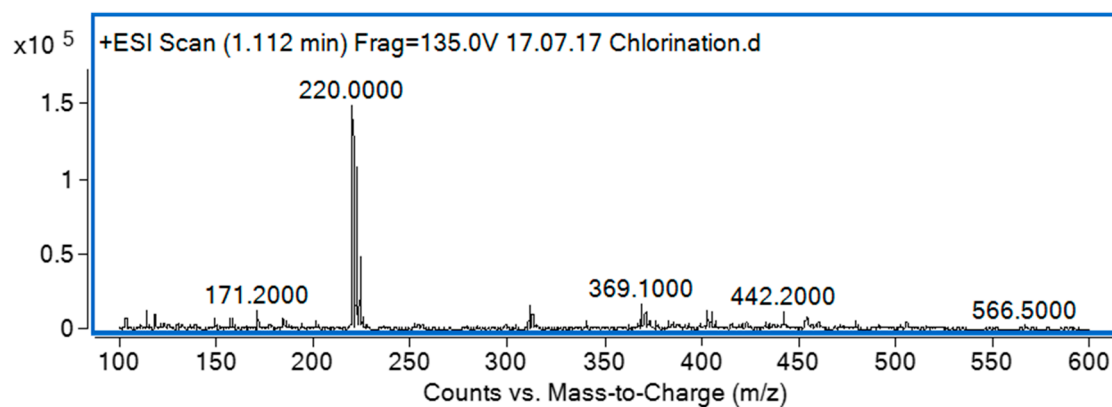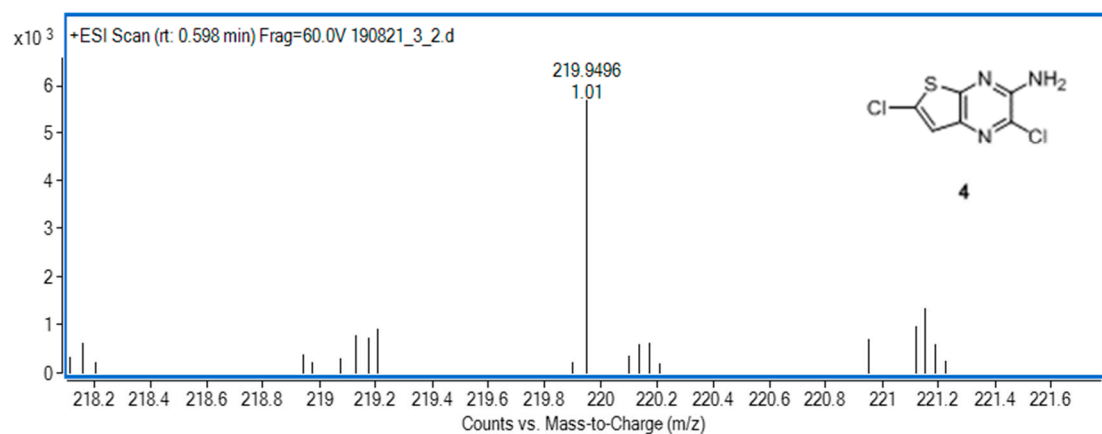

LC/MS, HR/MS-4

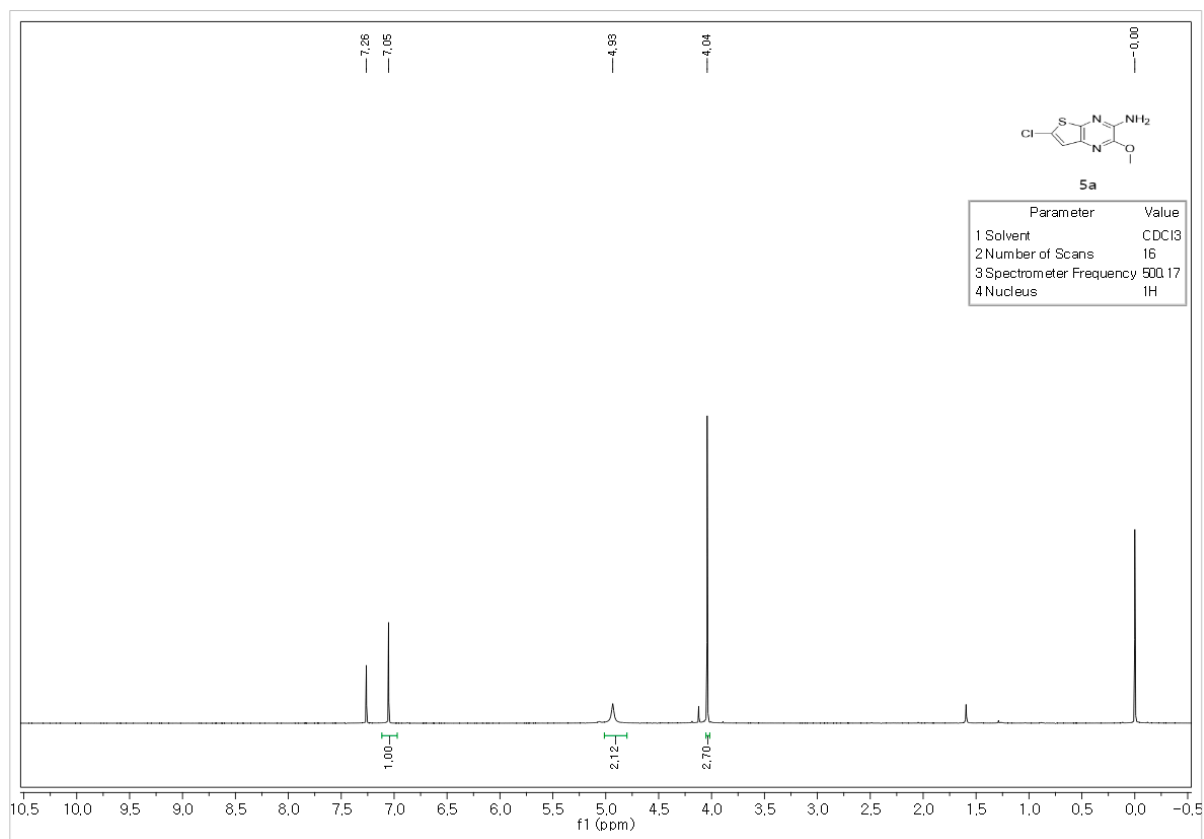

**<sup>1</sup>H-NMR-5a**

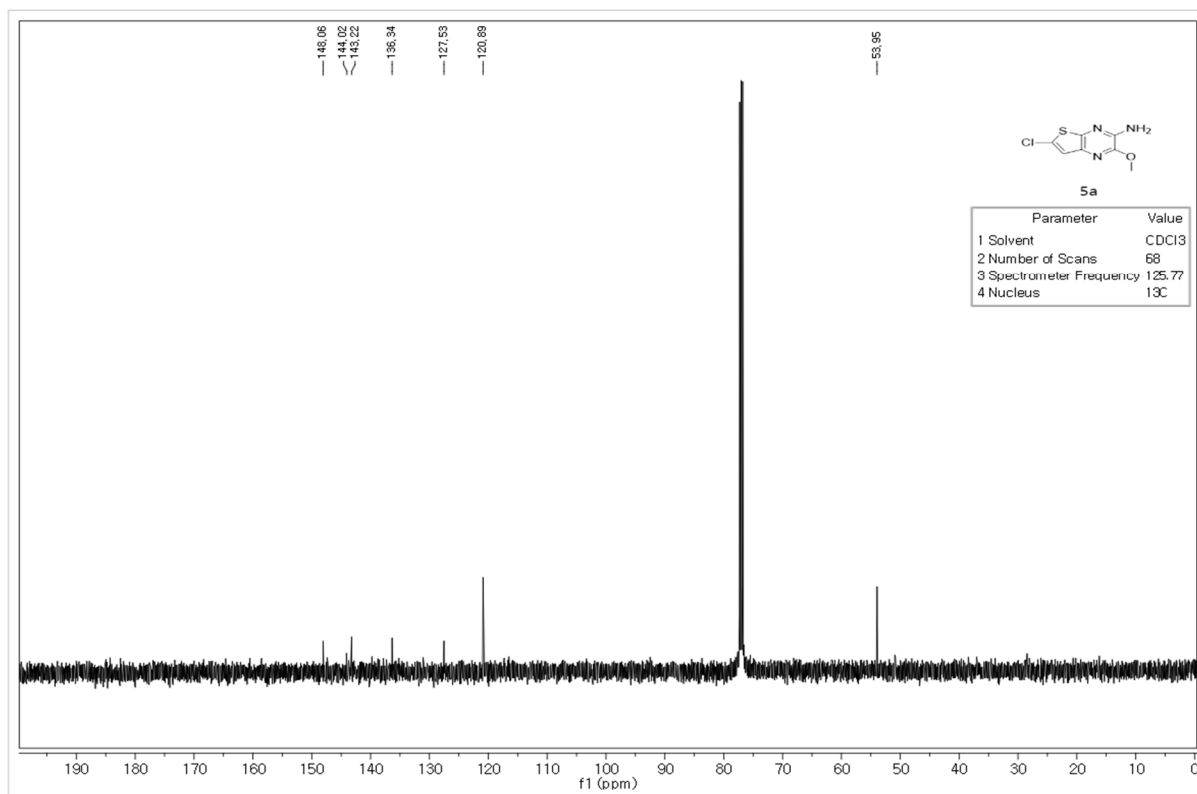

**<sup>13</sup>C-NMR-5a**

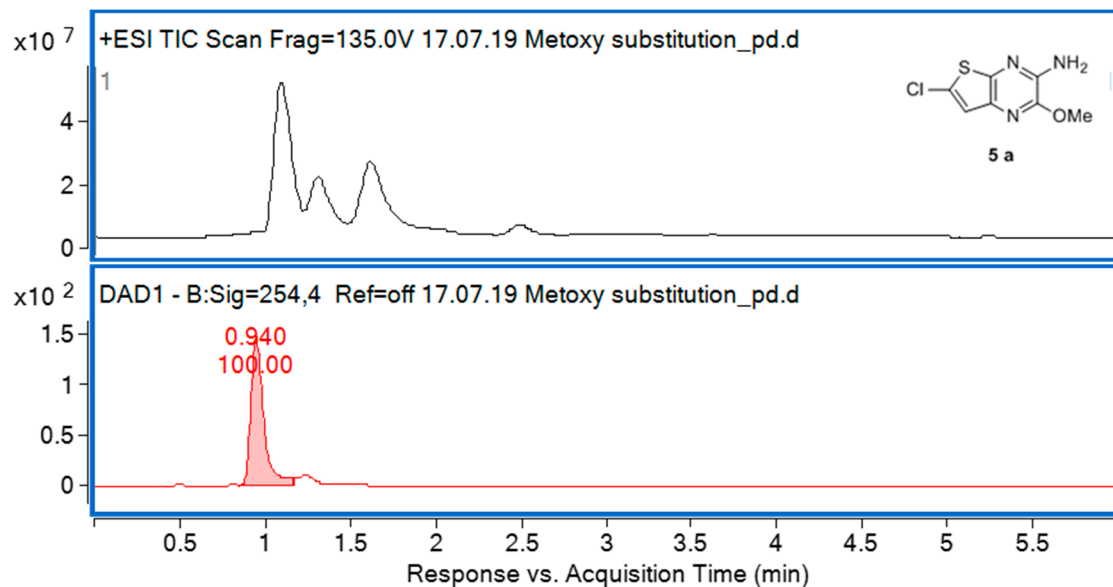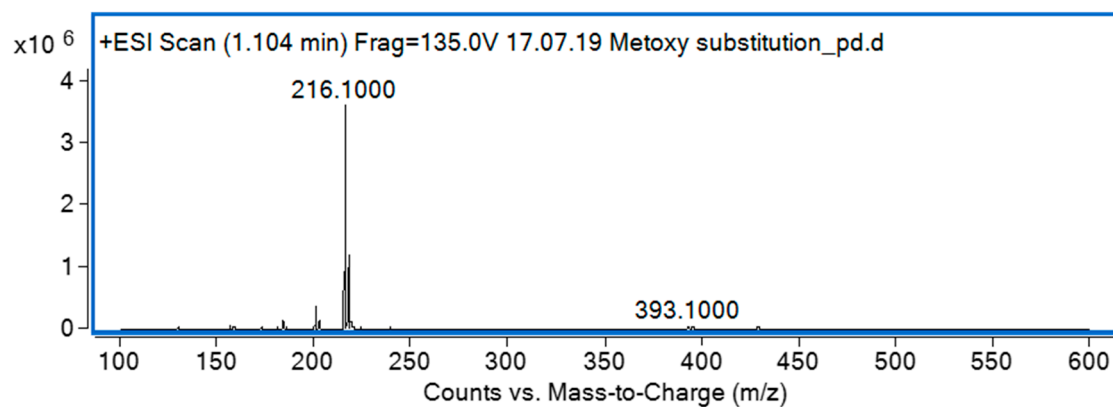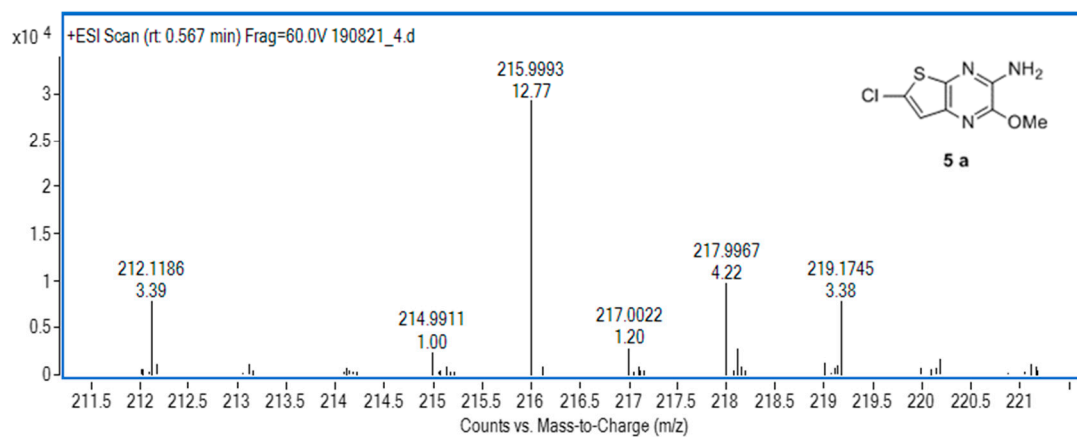

LC/MS, HR/MS-5a

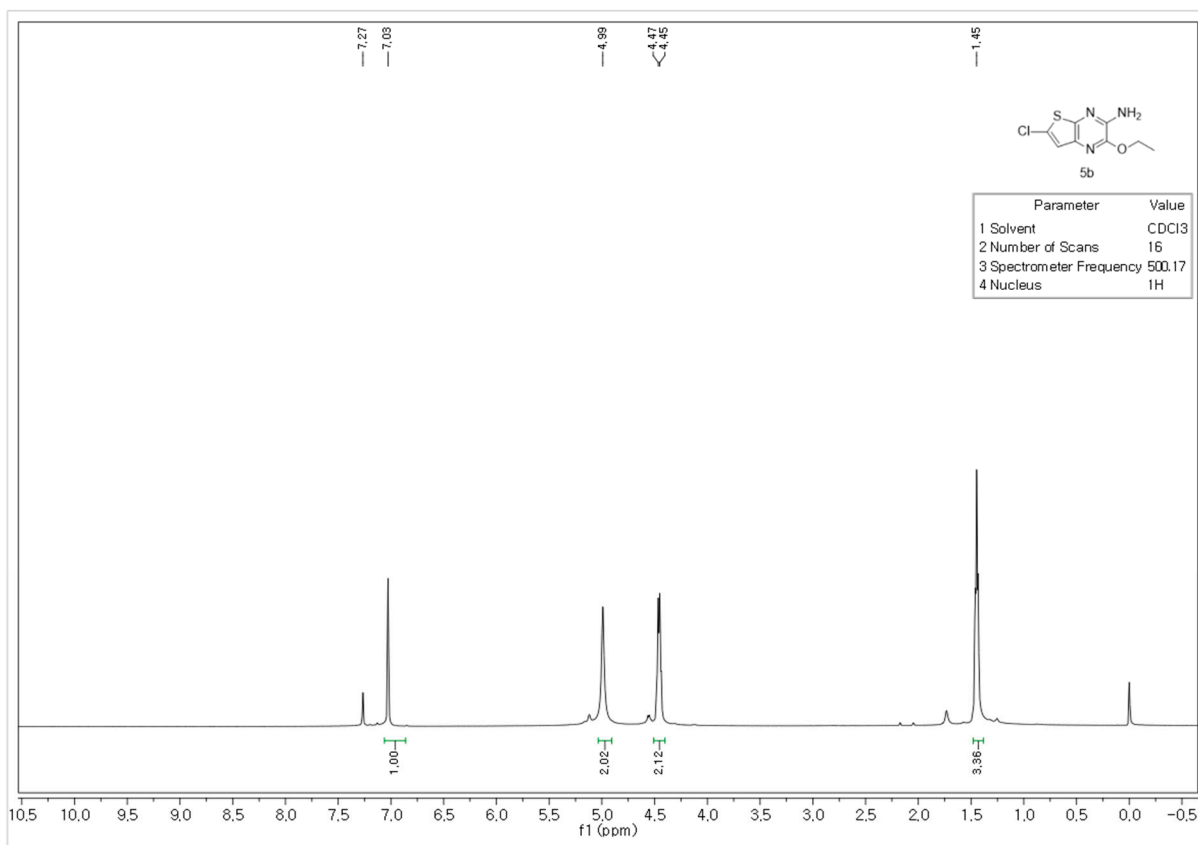

**<sup>1</sup>H-NMR-5b**

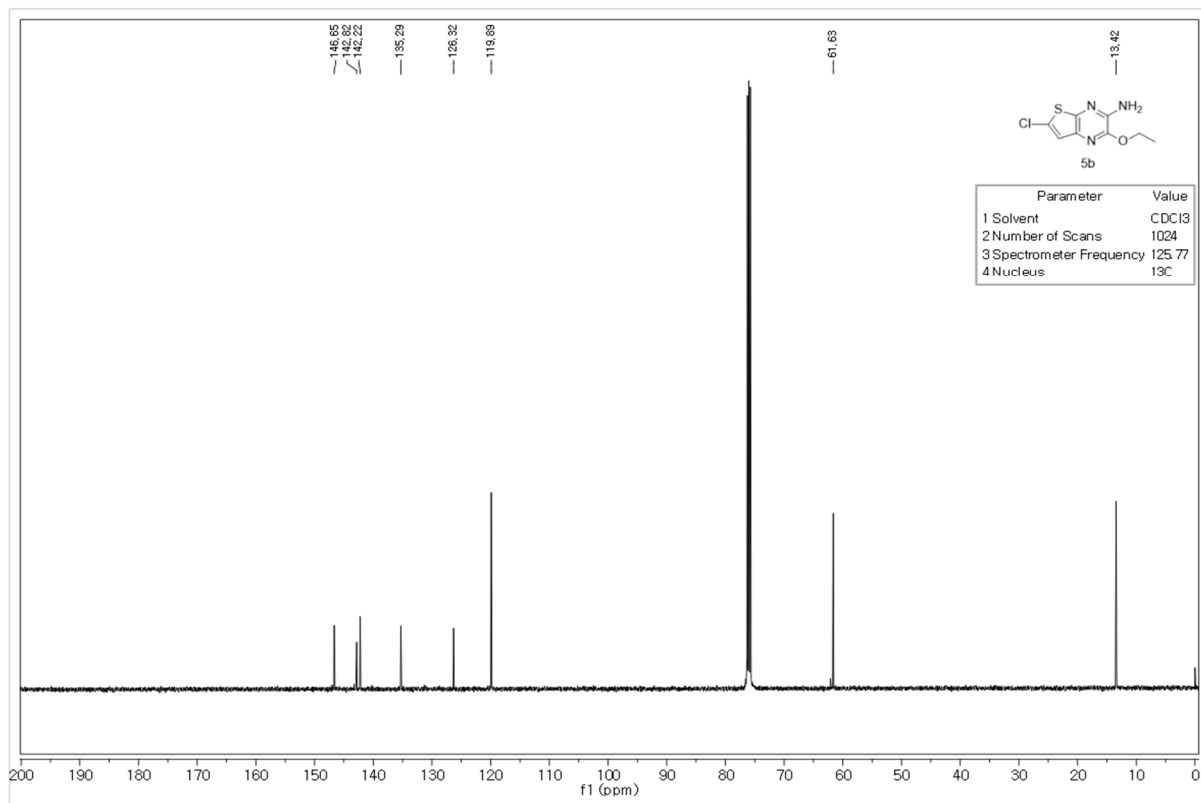

**<sup>13</sup>C-NMR-5b**

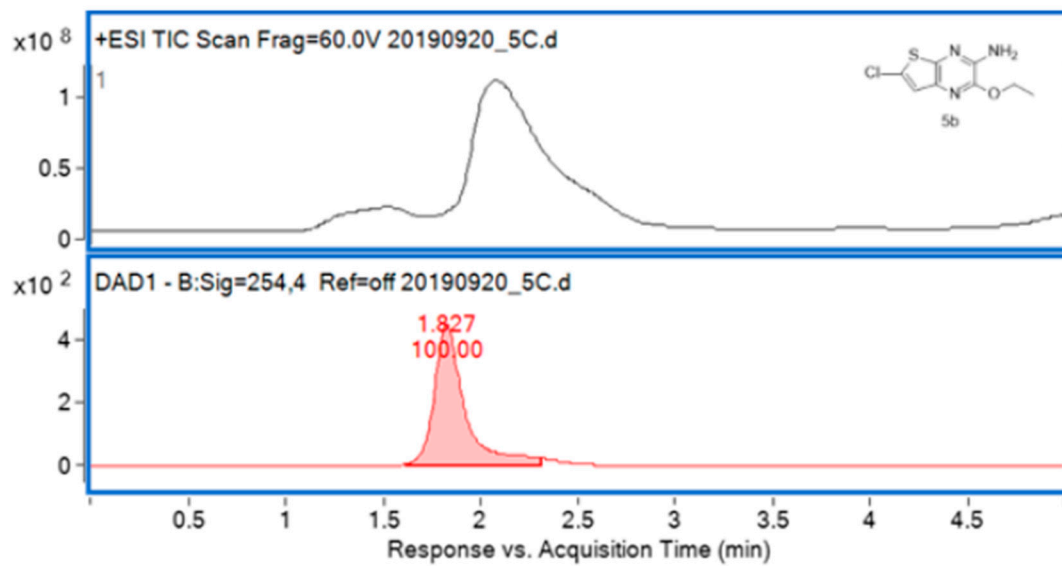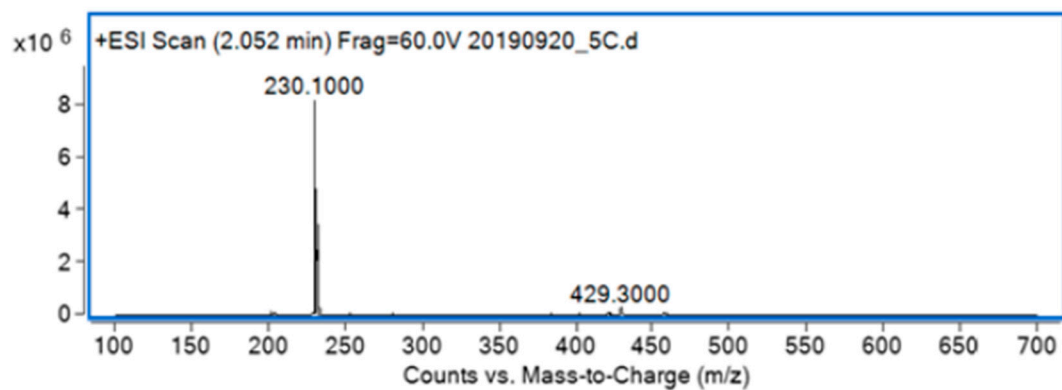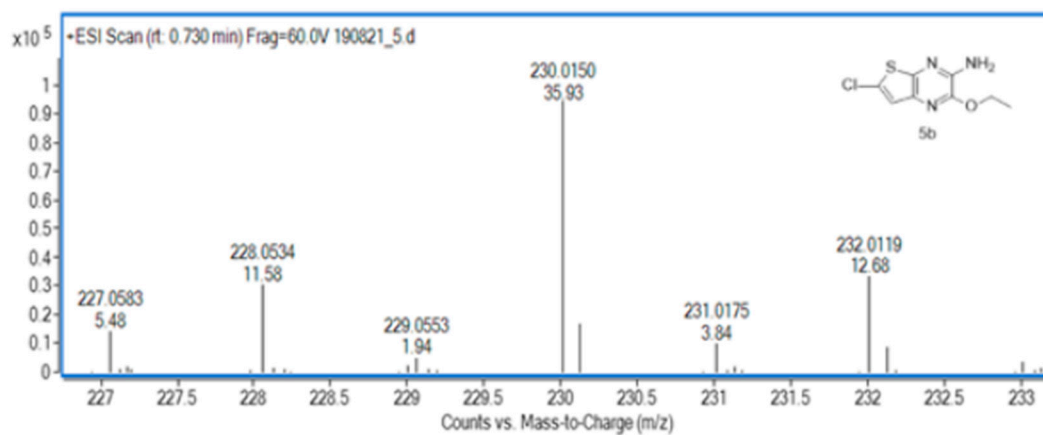

LC/MS, HR/MS-5b

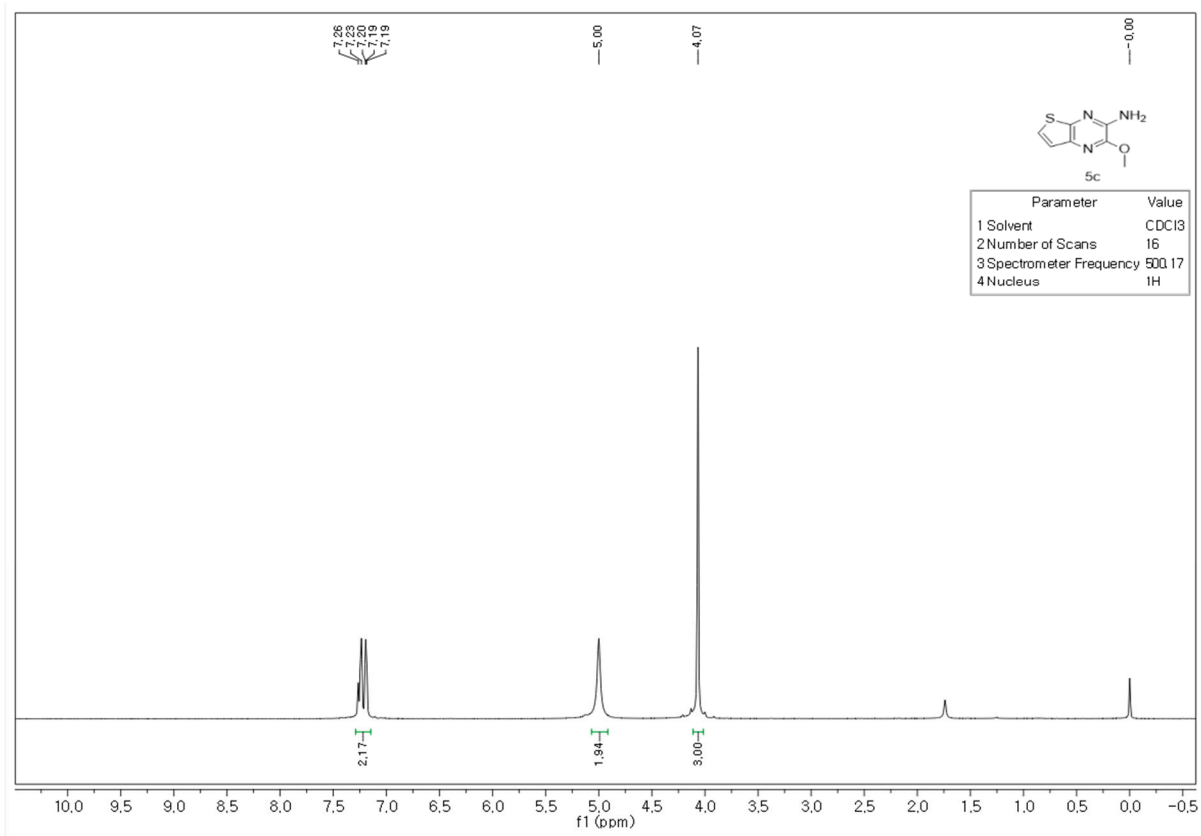

<sup>1</sup>H-NMR-5c

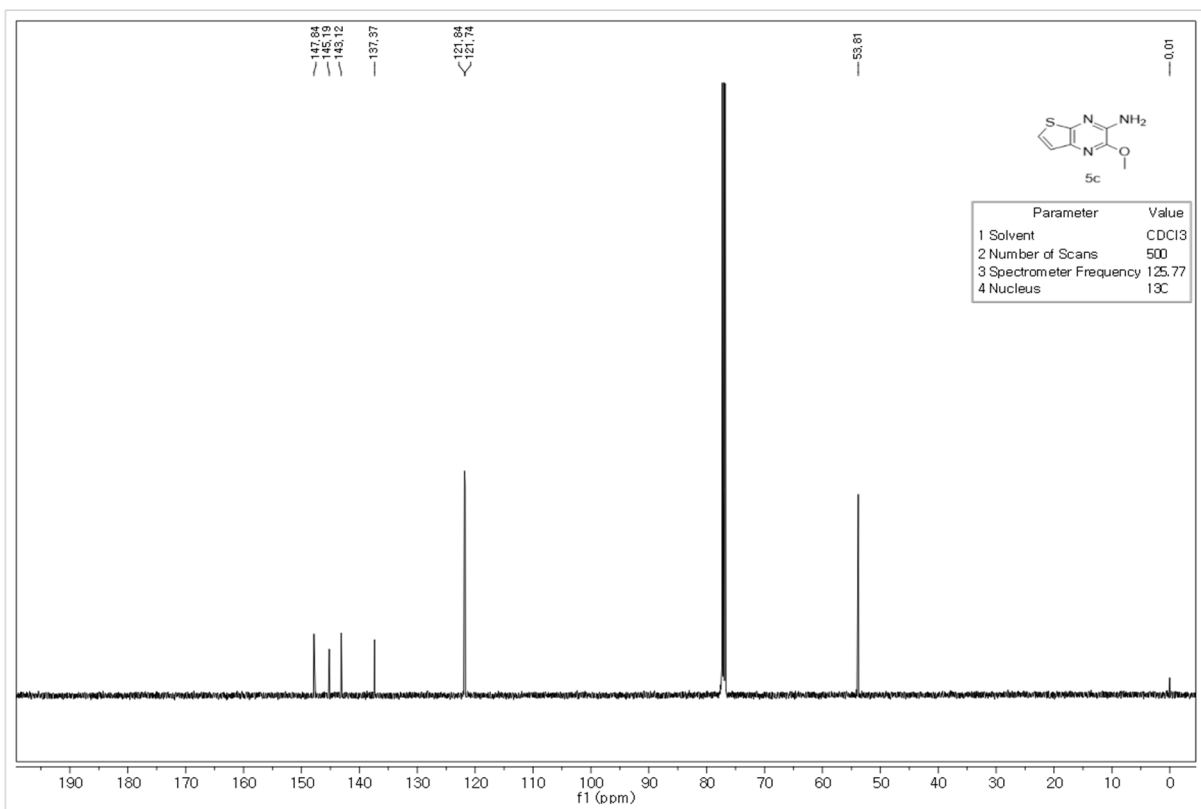

<sup>13</sup>C-NMR-5c



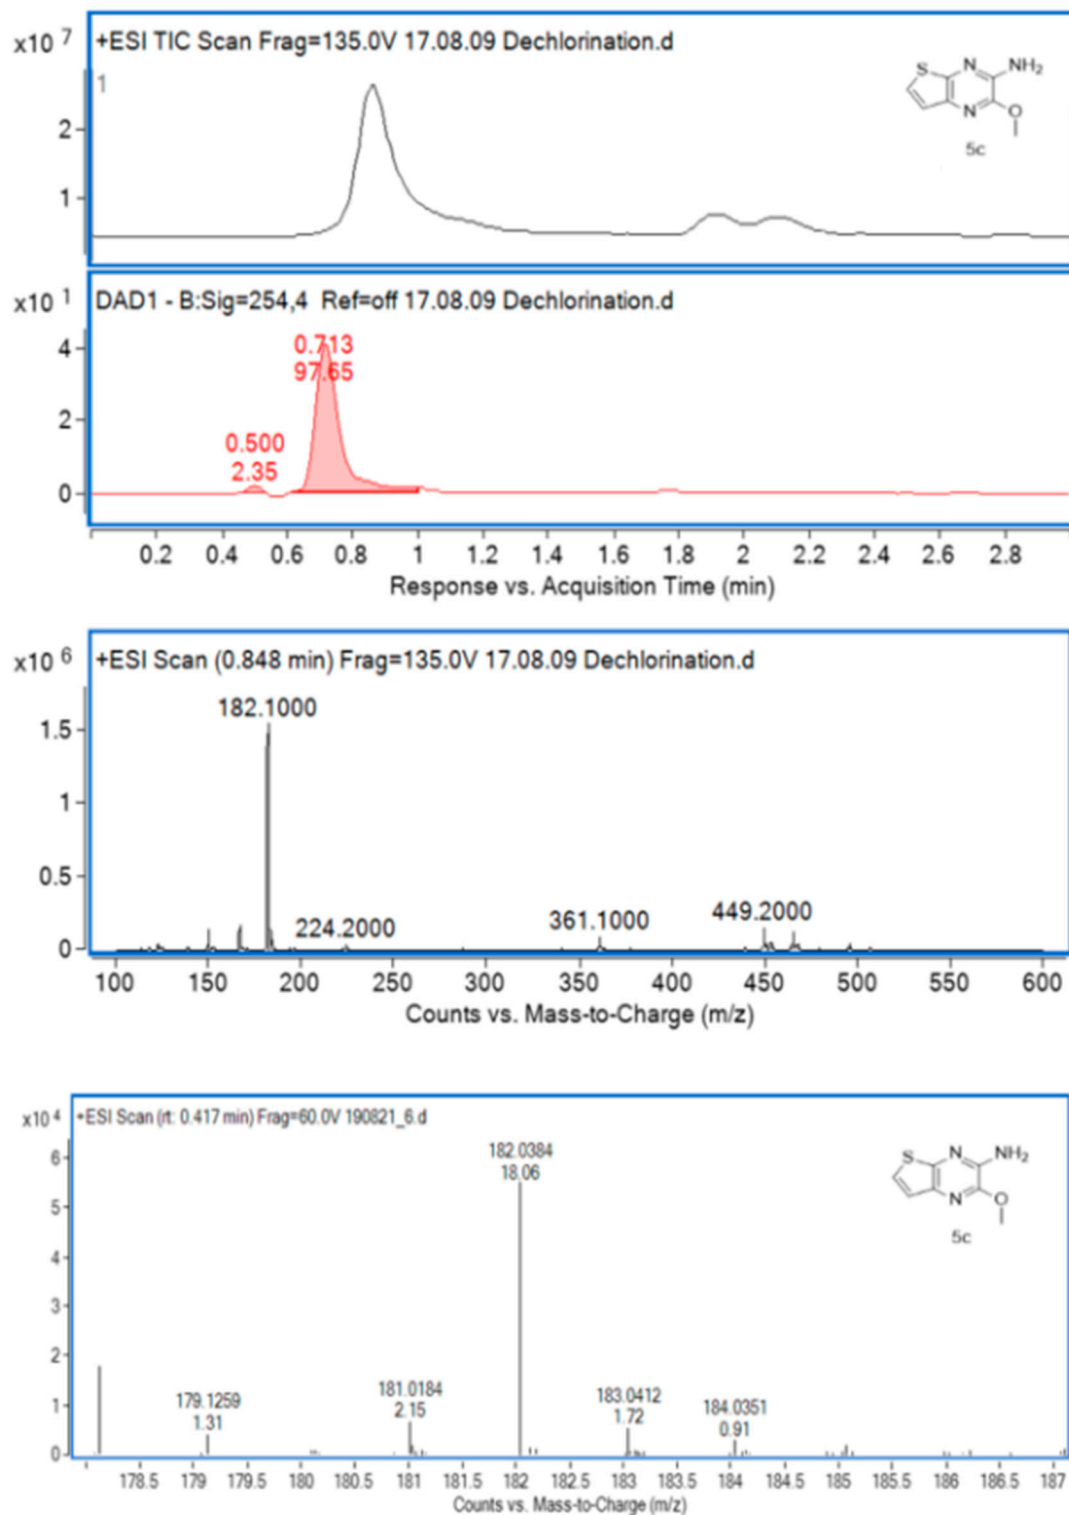

LC/MS, HR/MS-5c

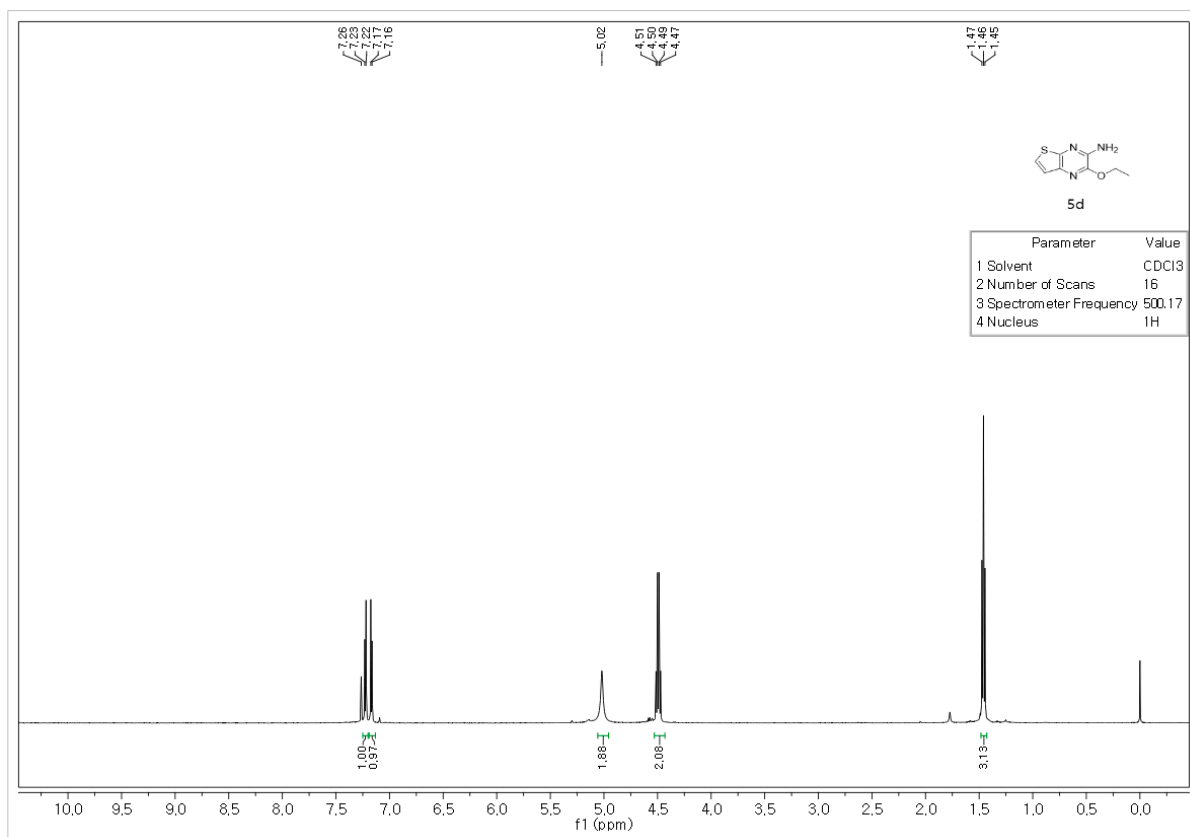

<sup>1</sup>H-NMR-5d

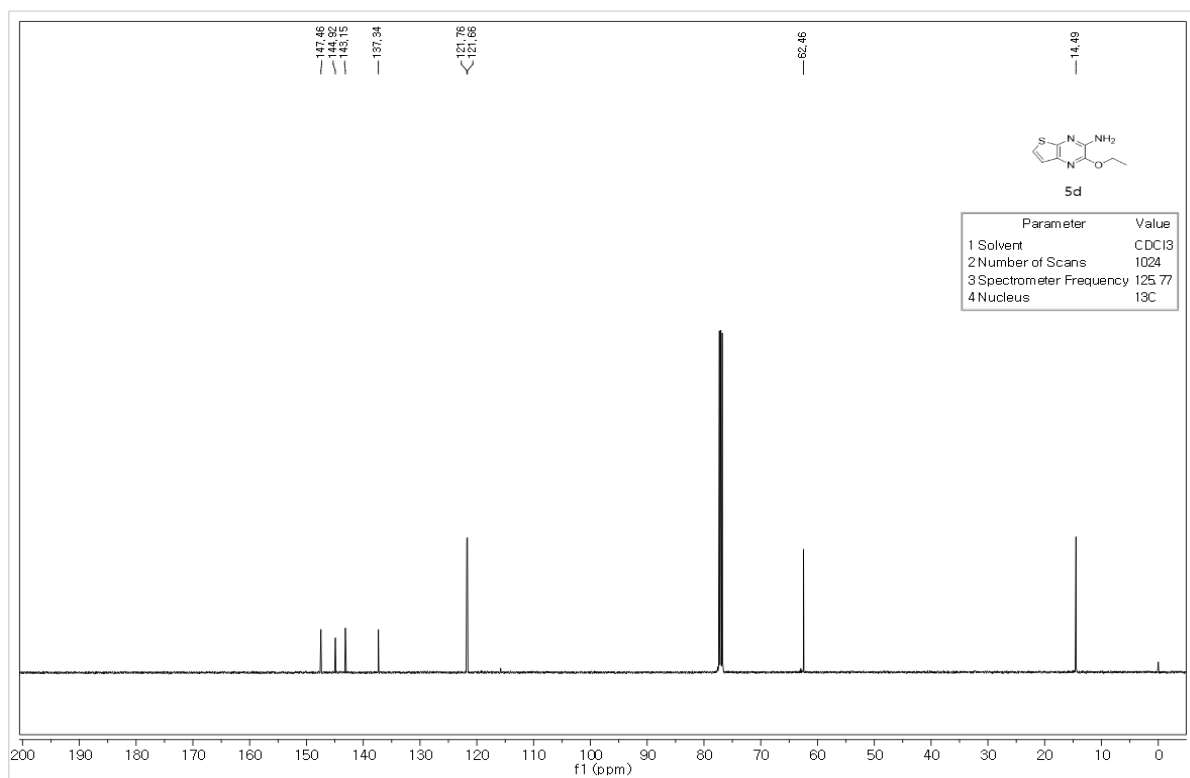

<sup>13</sup>C-NMR-5d

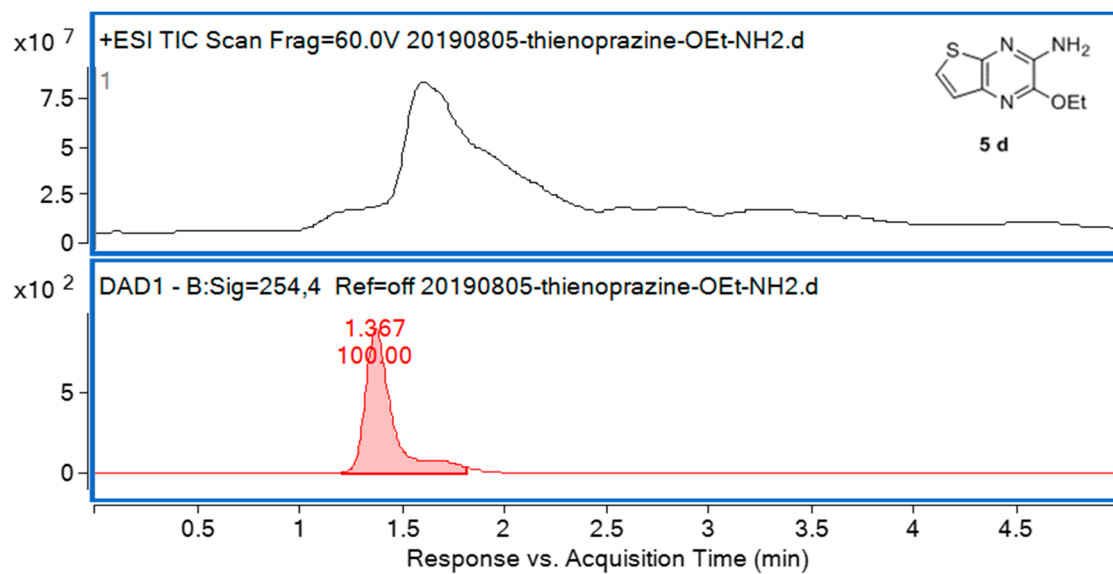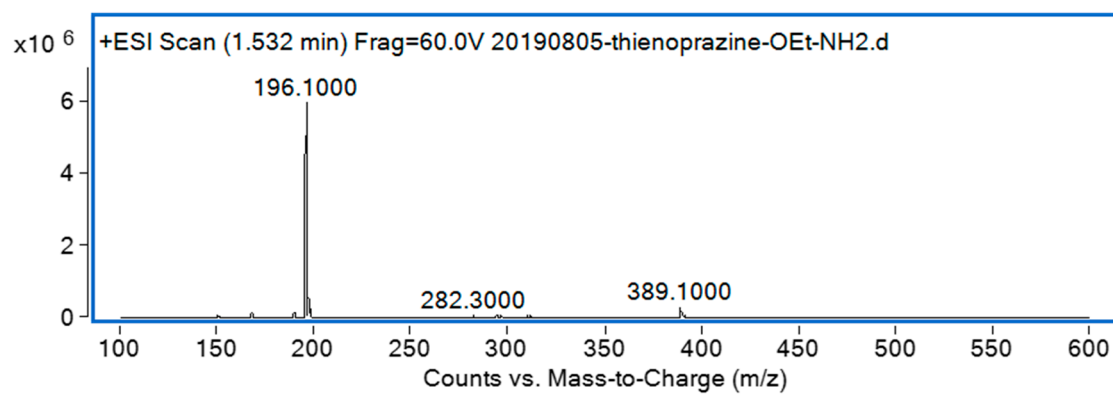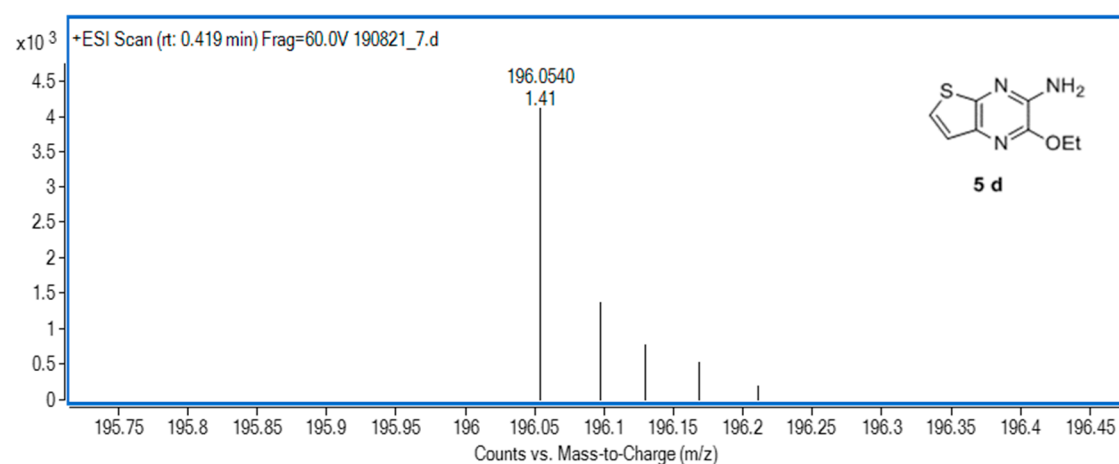

LC/MS, HR/MS-5d

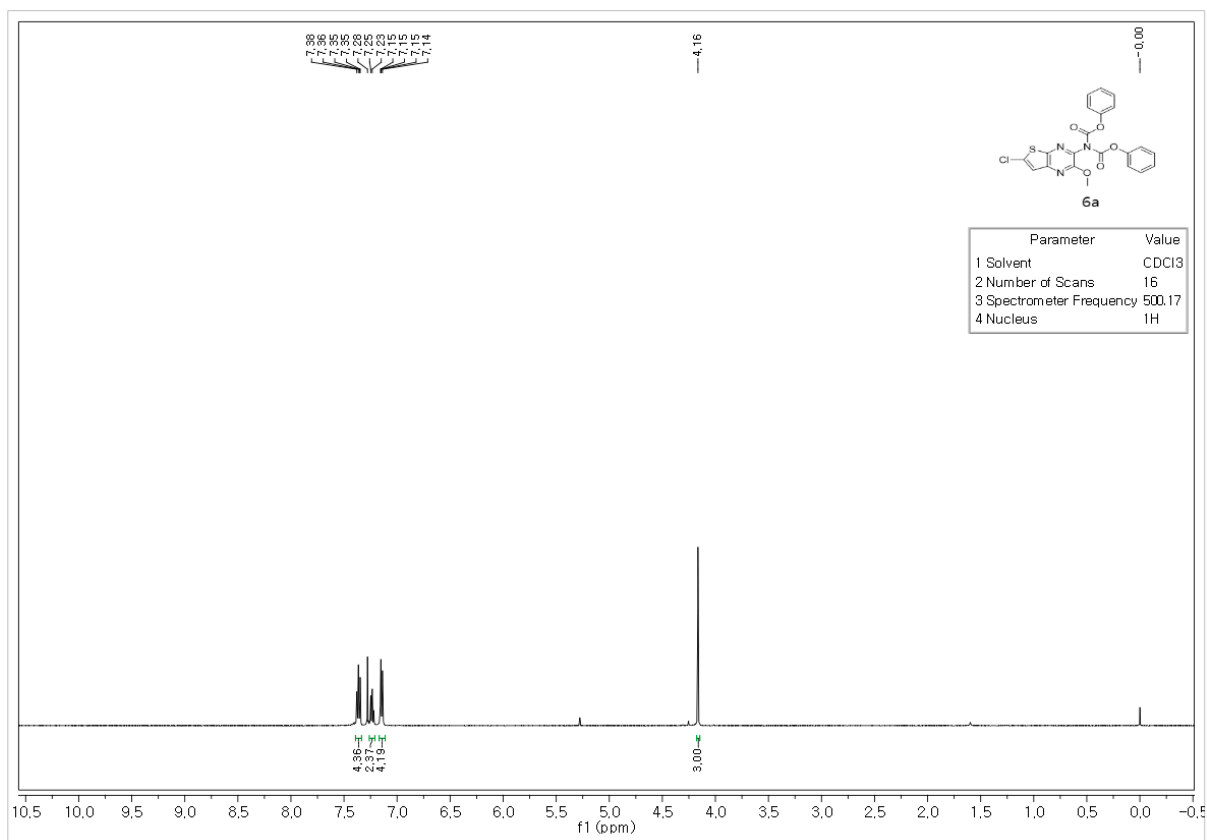

**<sup>1</sup>H-NMR-6a**

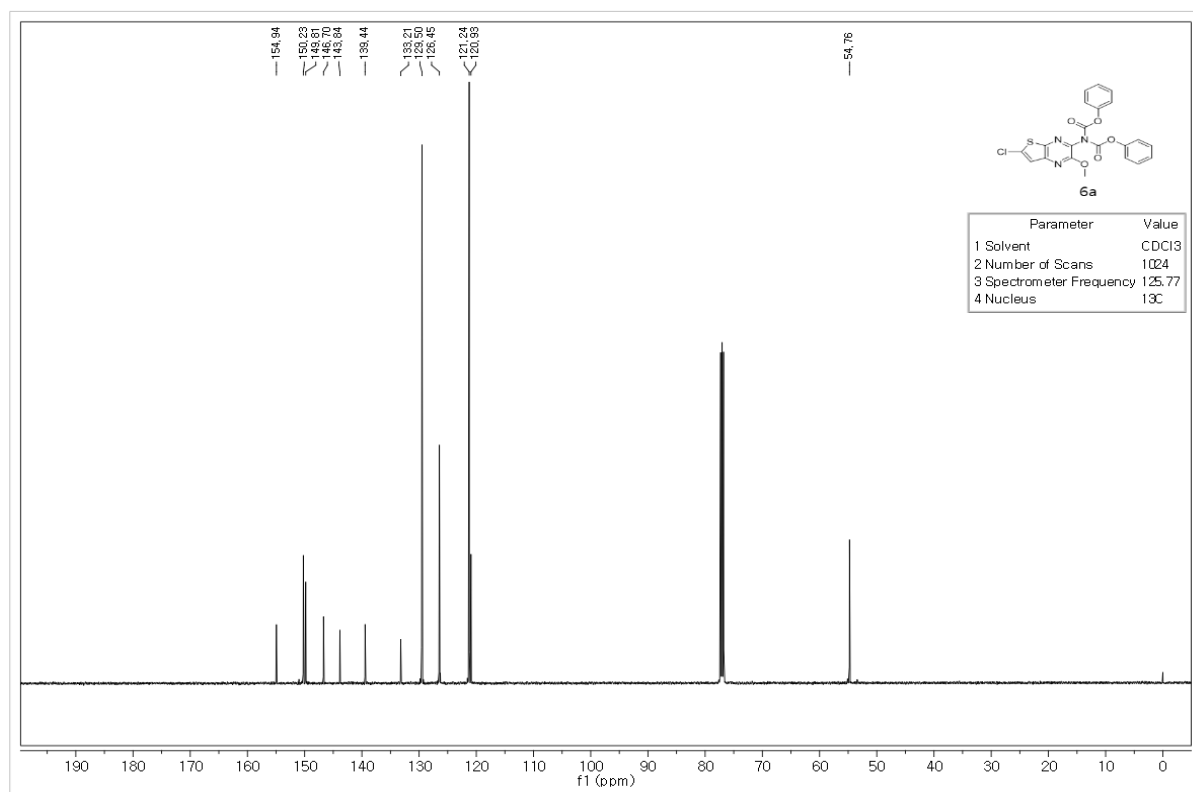

**<sup>13</sup>C-NMR-6a**

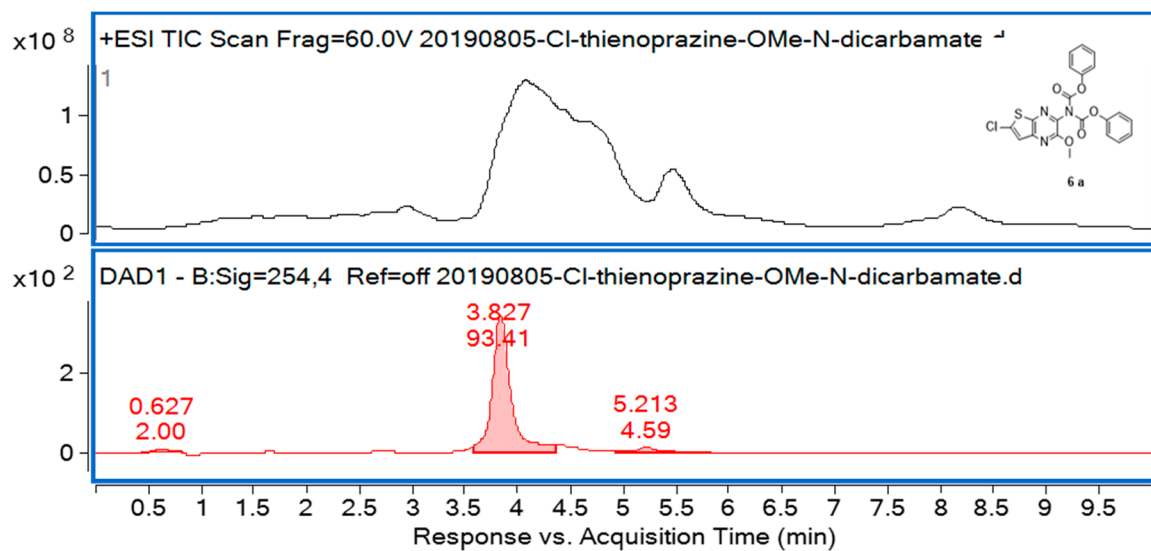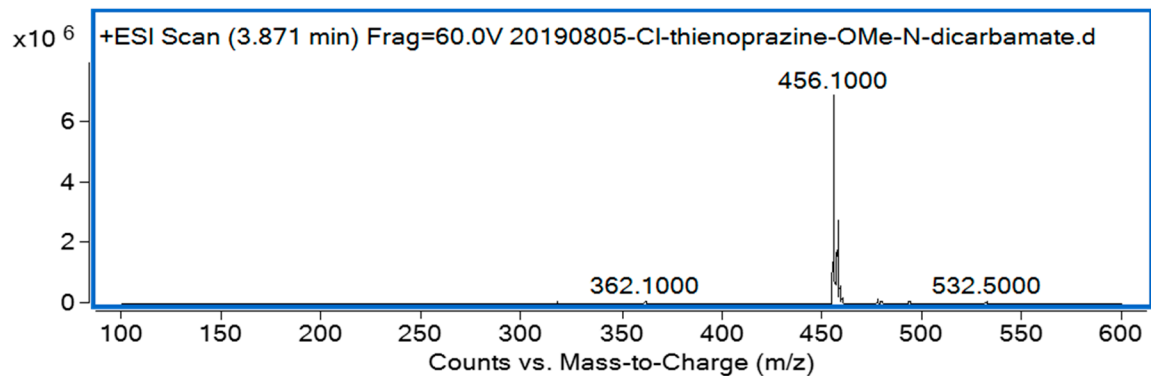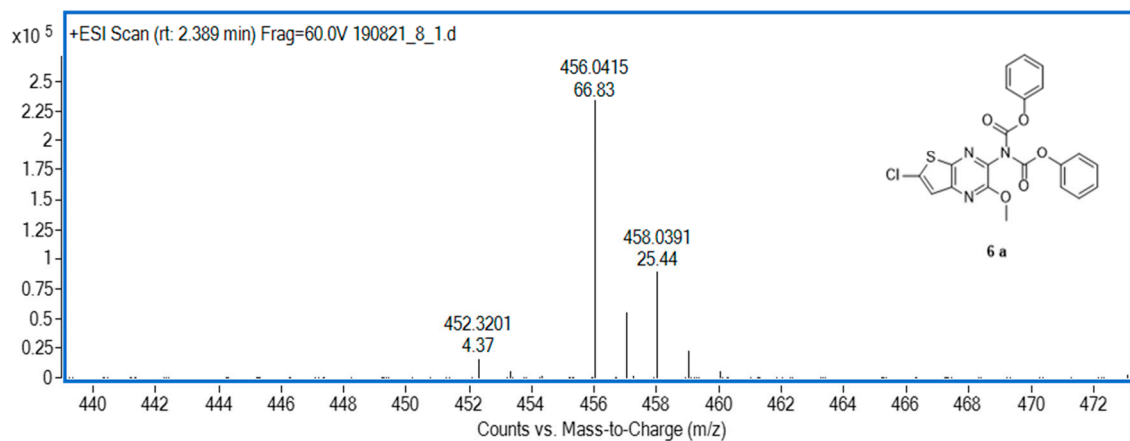

**LC/MS, HR/MS-6a**

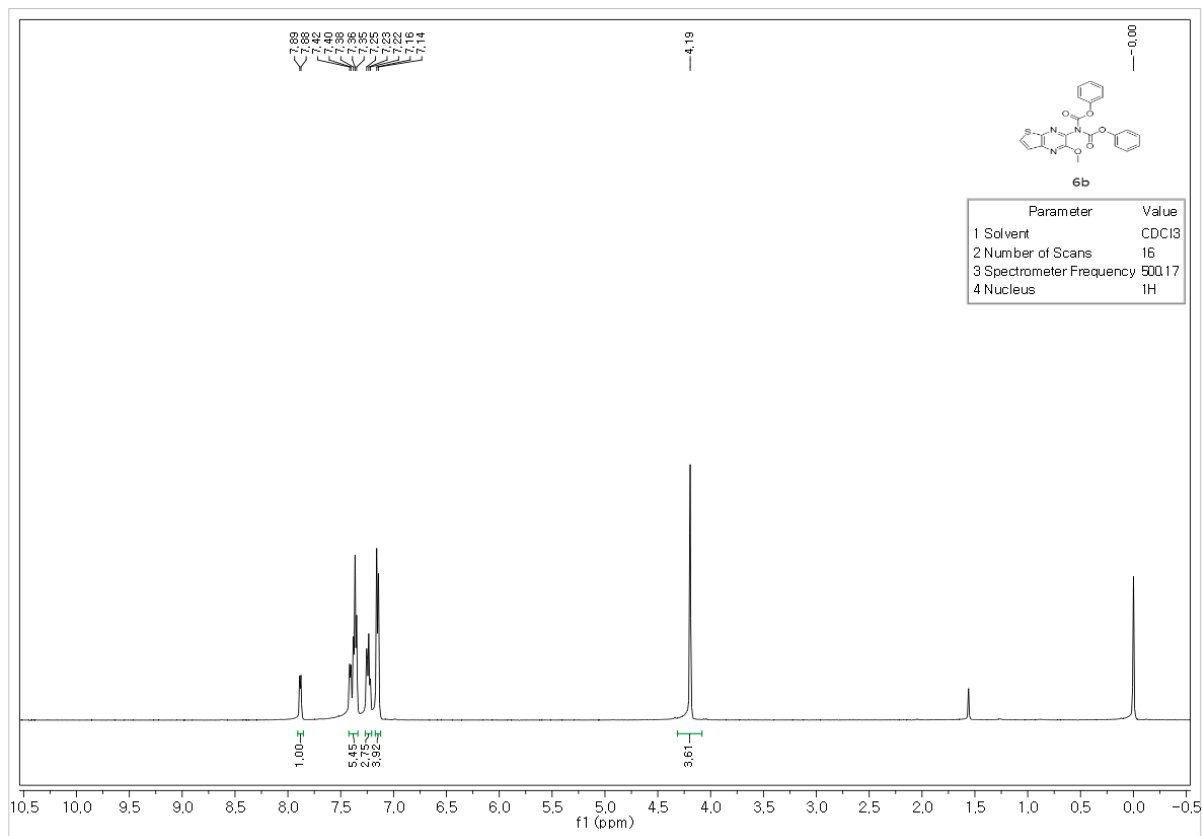

**<sup>1</sup>H-NMR-6b**

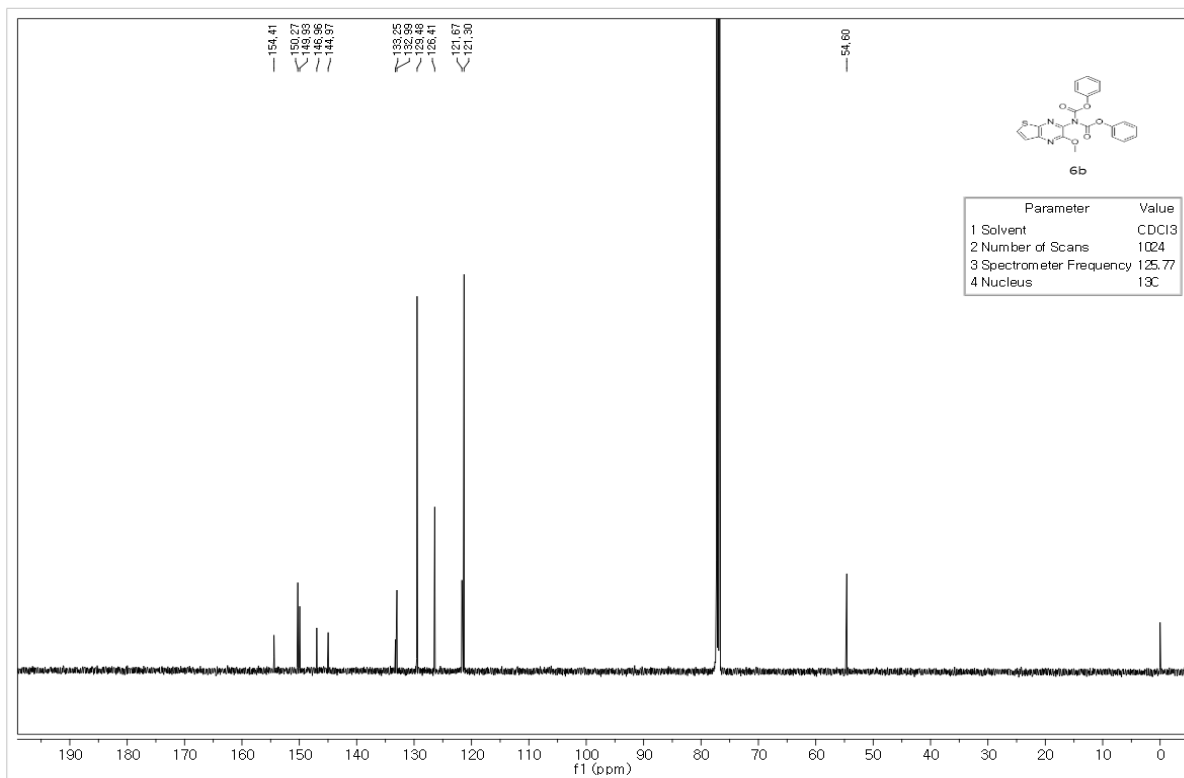

**<sup>13</sup>C-NMR-6b**

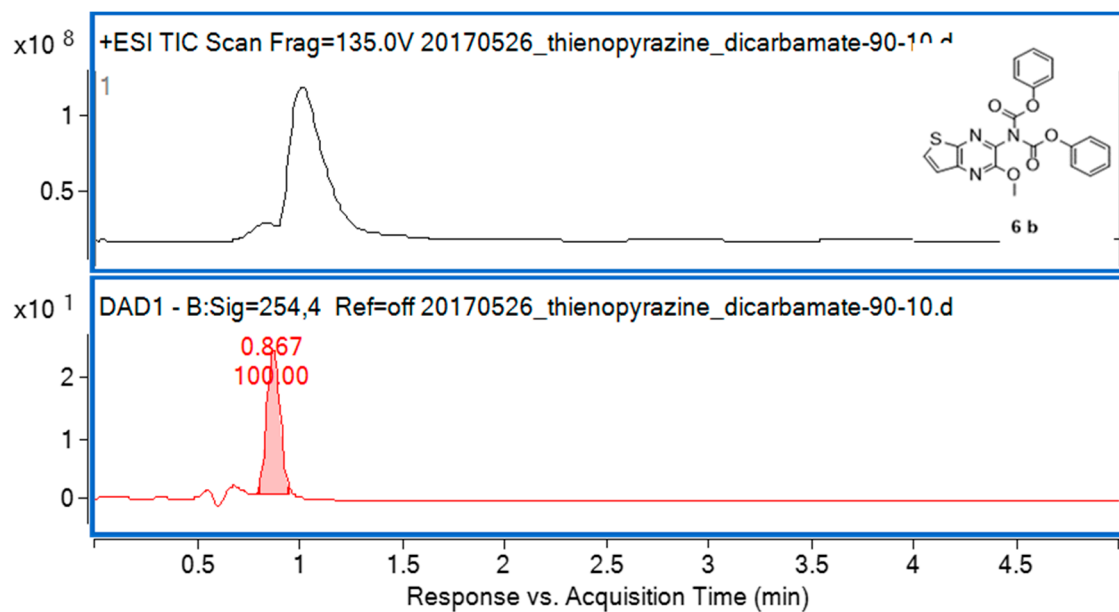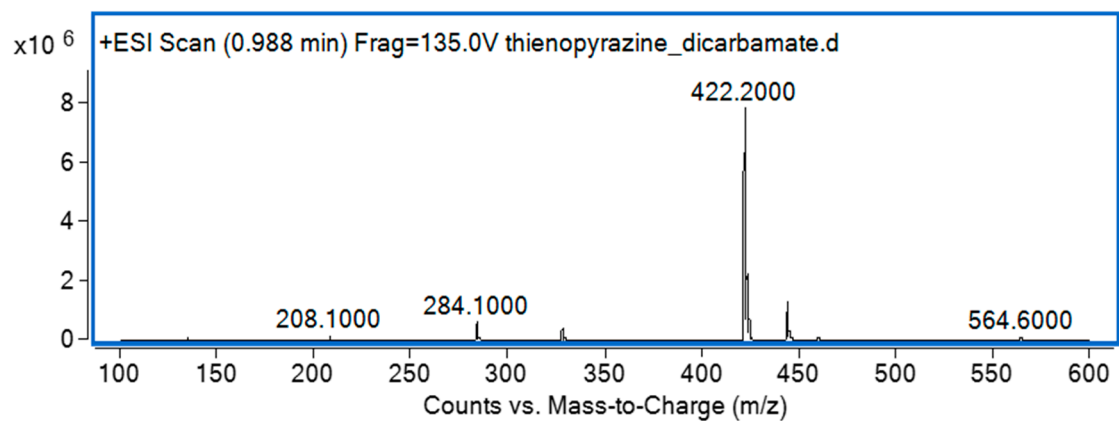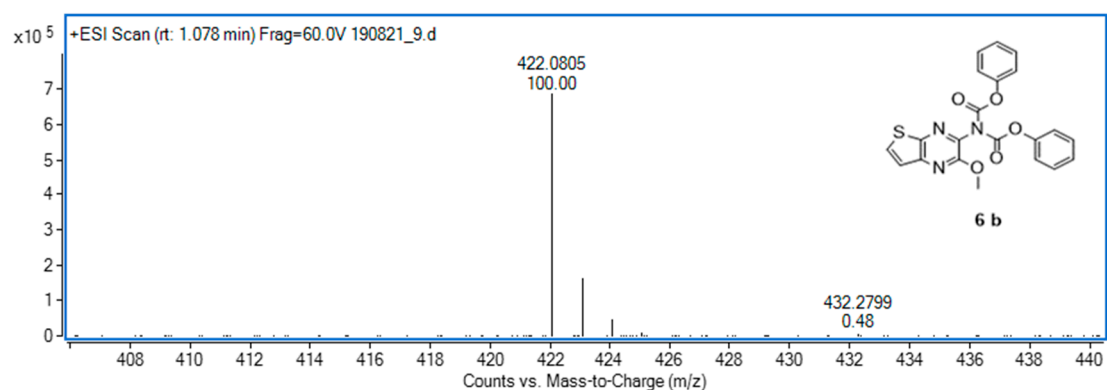

LC/MS, HR/MS-6b

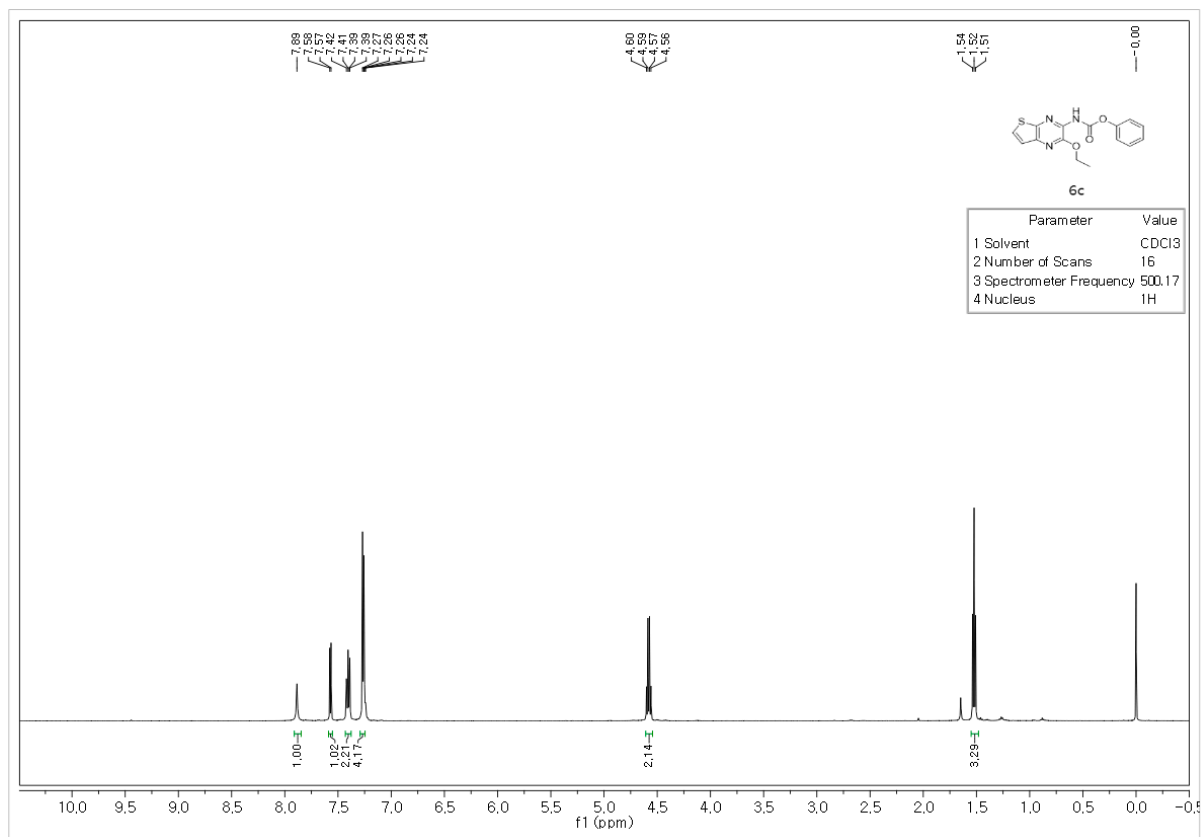

<sup>1</sup>H-NMR-6c

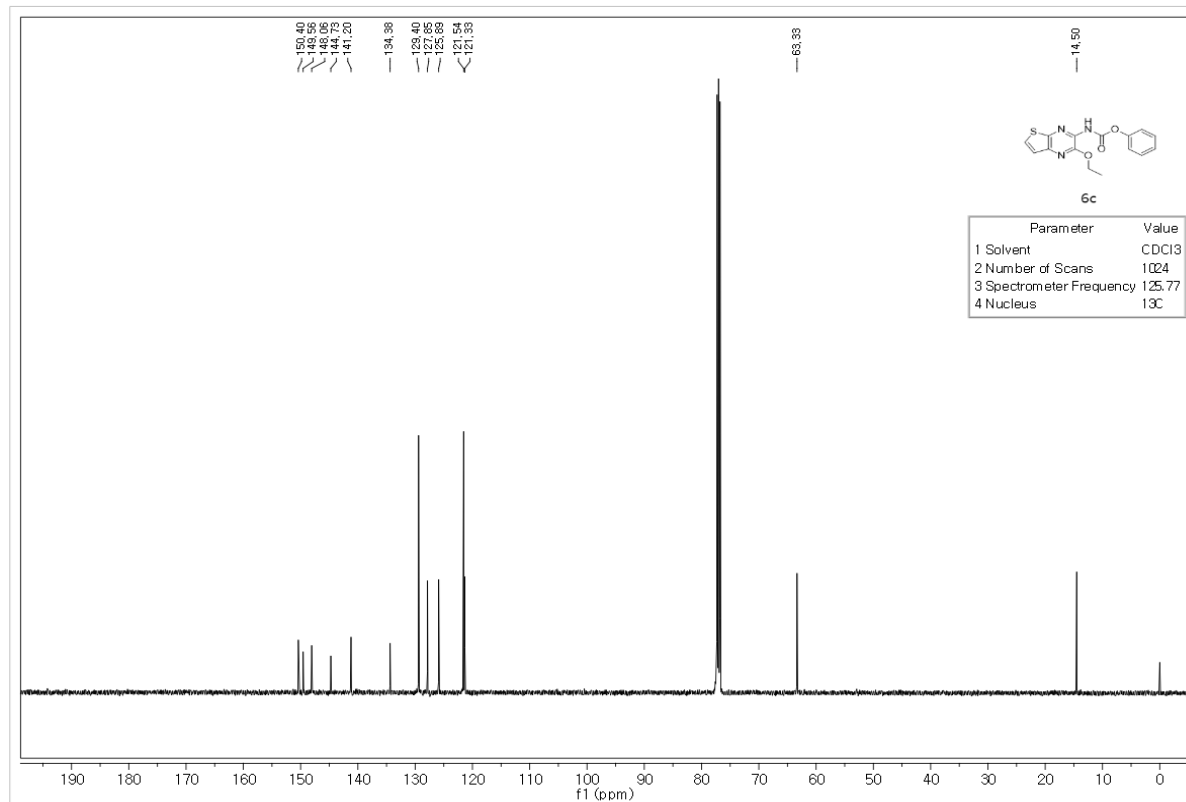

<sup>13</sup>C-NMR-6c



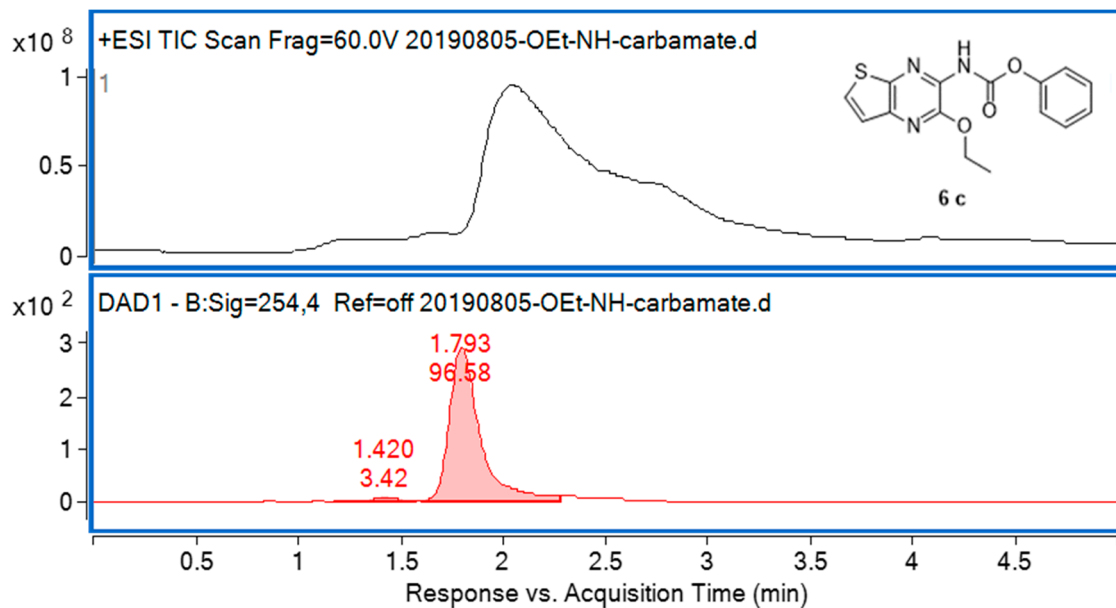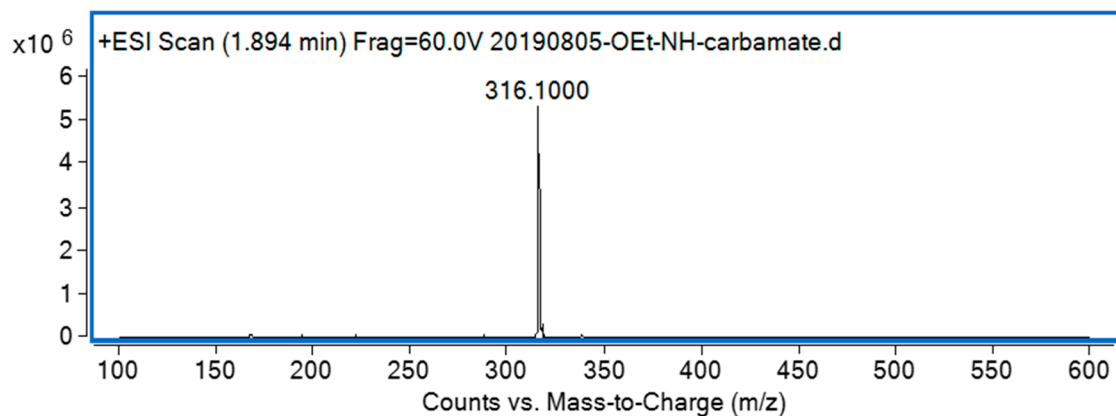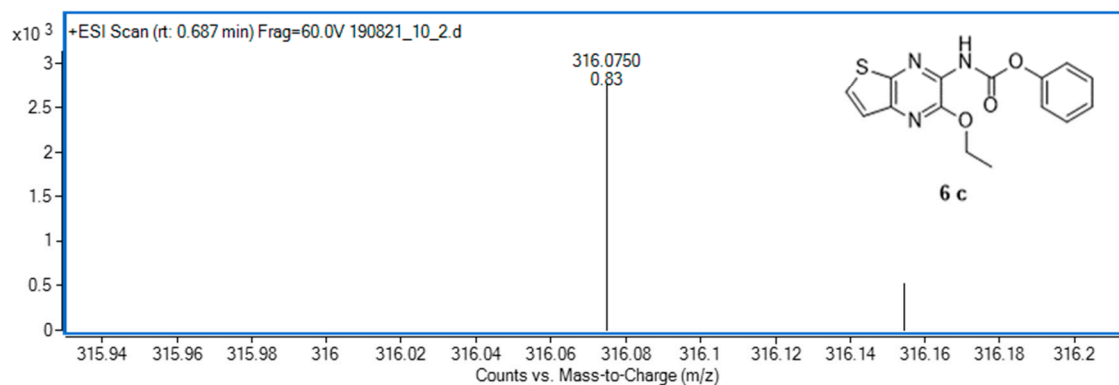

LC/MS, HR/MS-6c

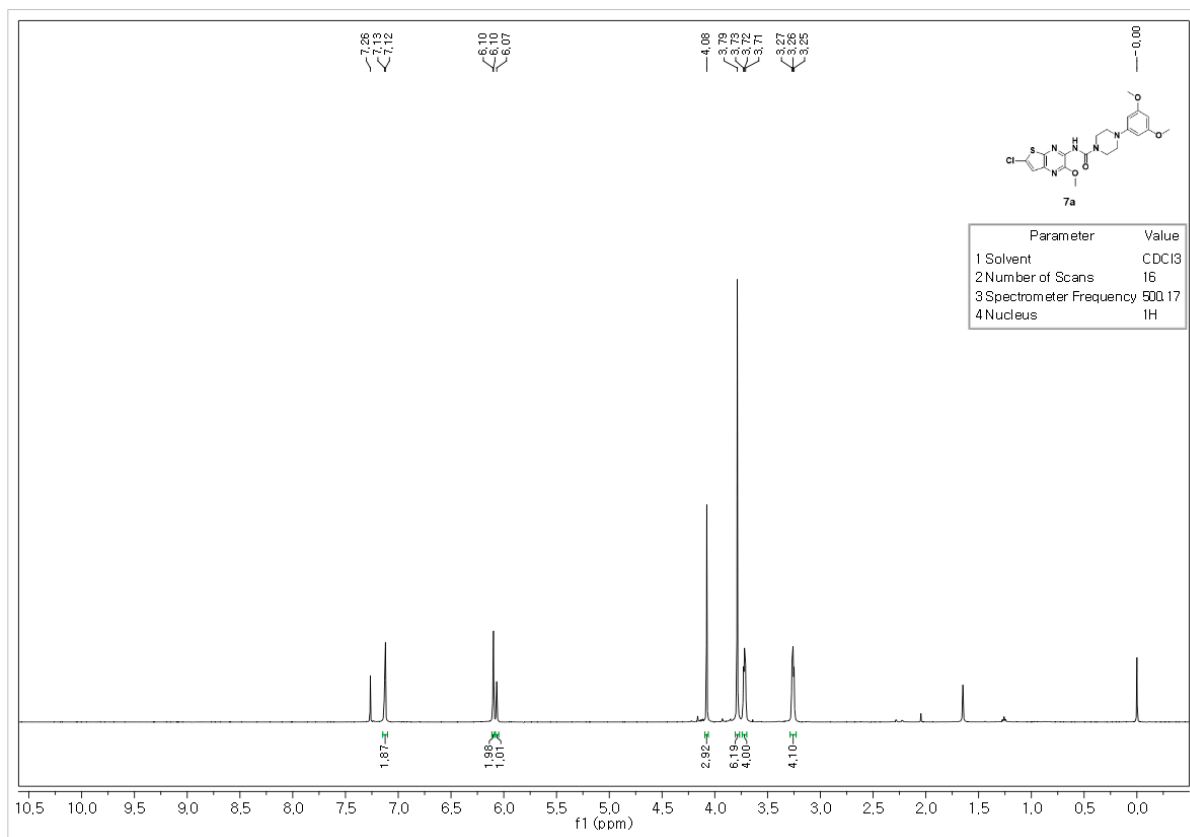

**<sup>1</sup>H-NMR-7a**

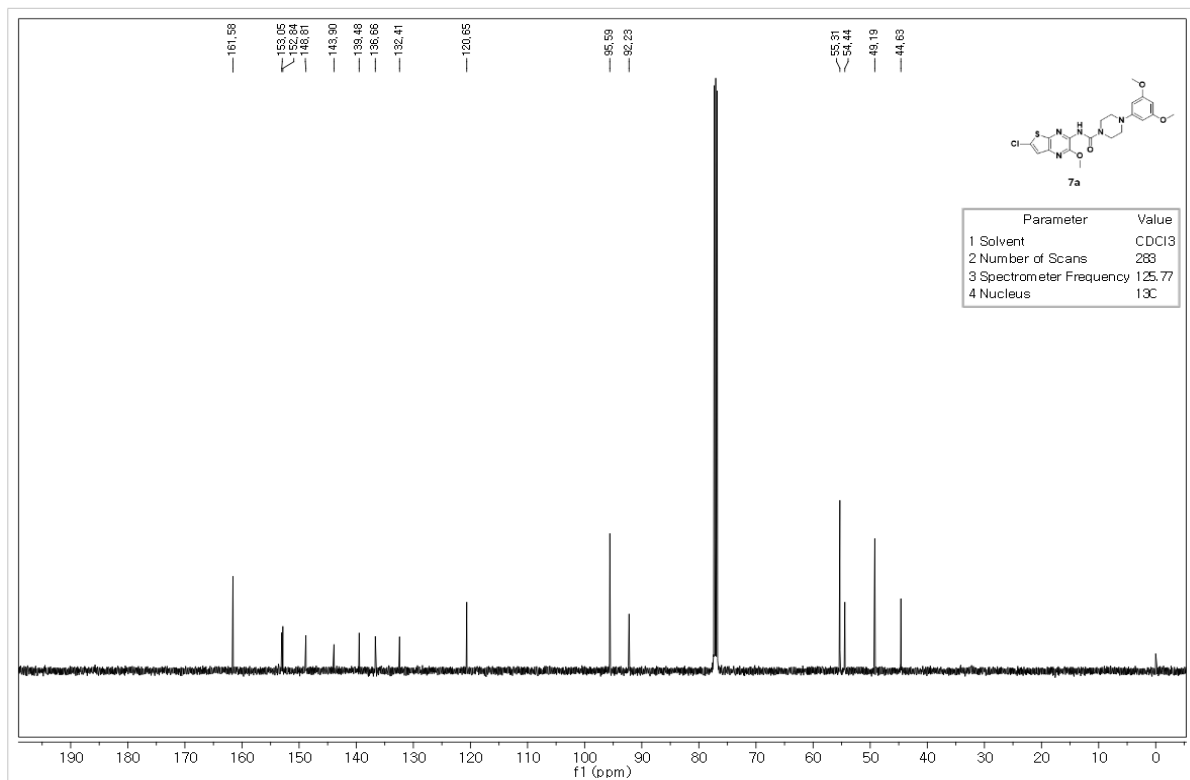

**<sup>13</sup>C-NMR-7a**

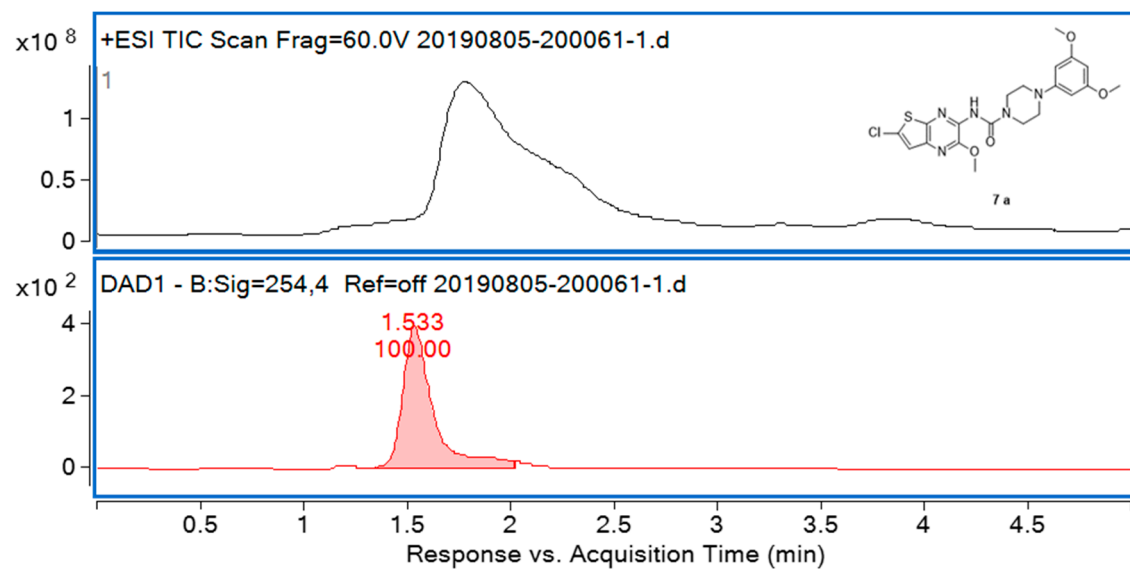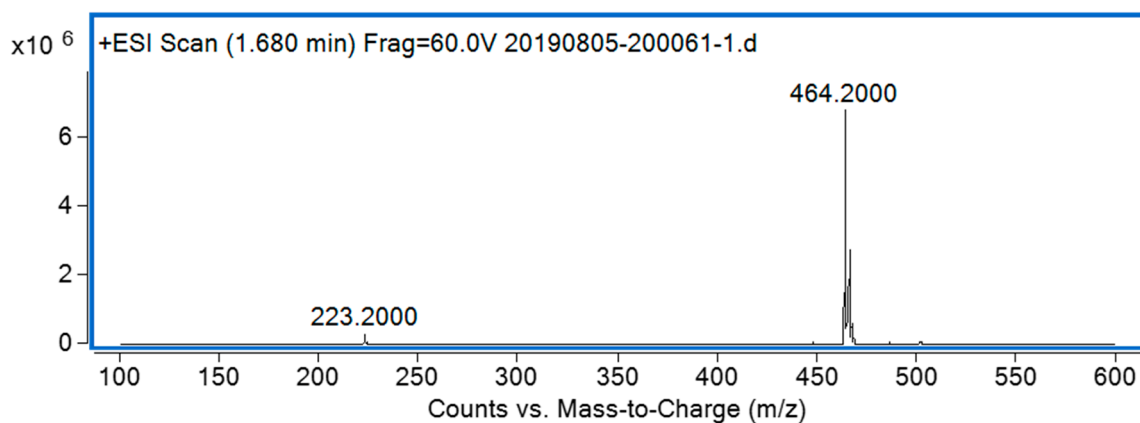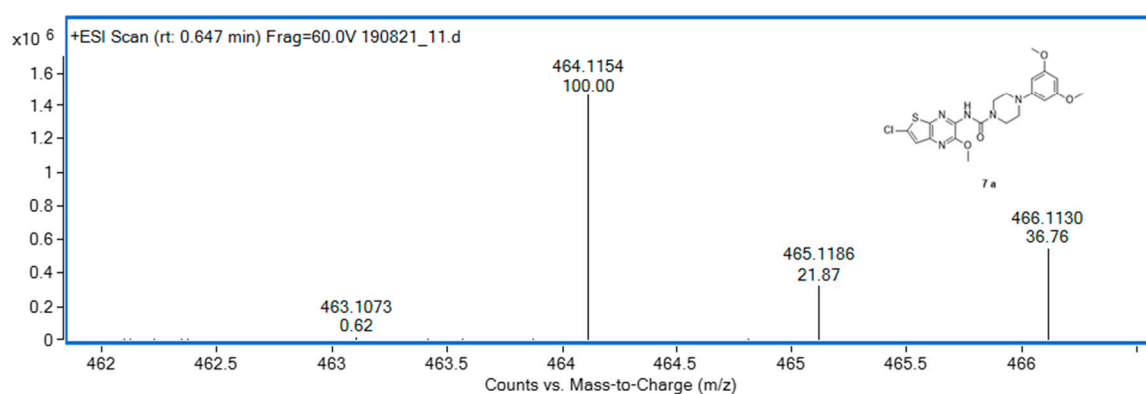

LC/MS, HR/MS-7a

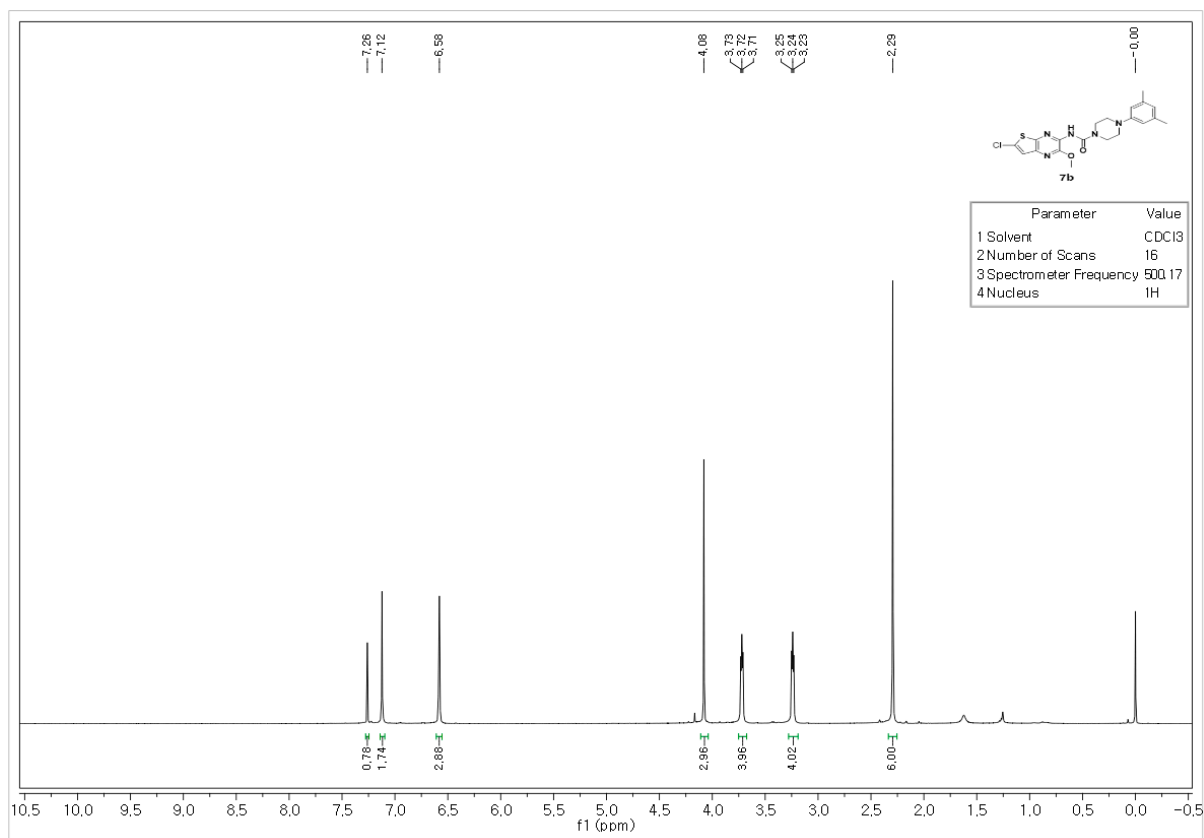

**<sup>1</sup>H-NMR-7b**

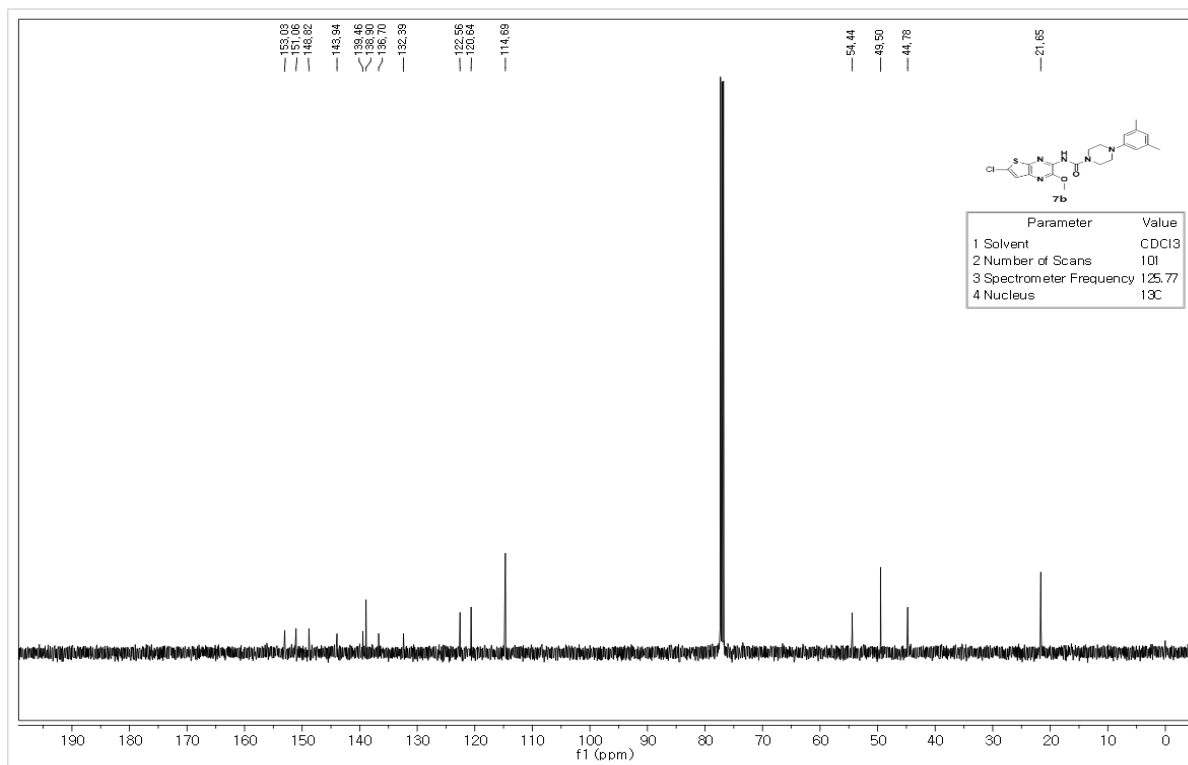

**<sup>13</sup>C-NMR-7b**

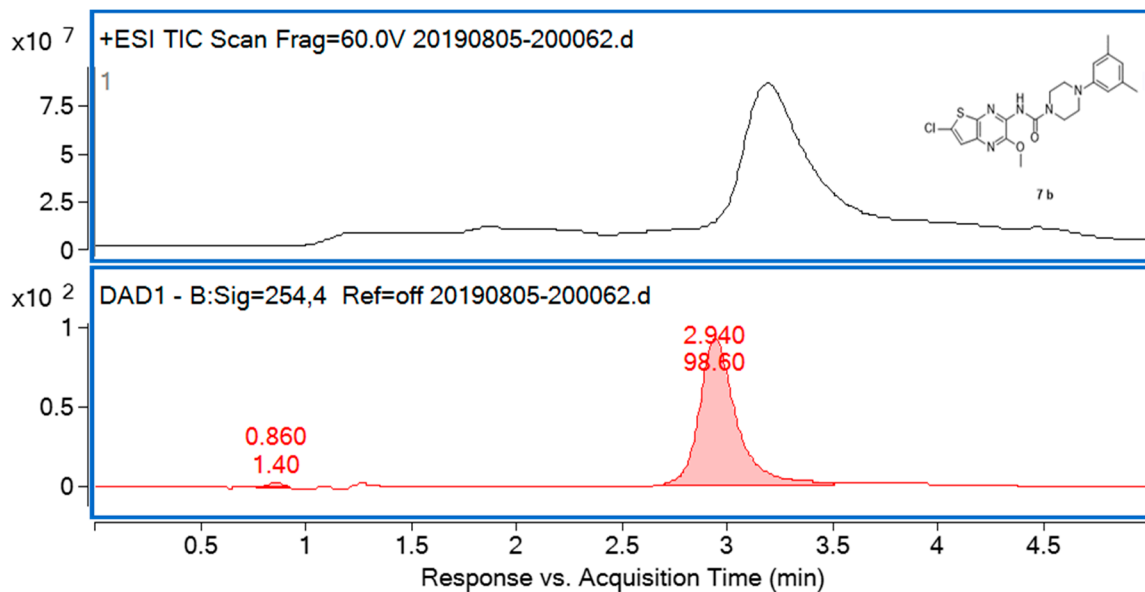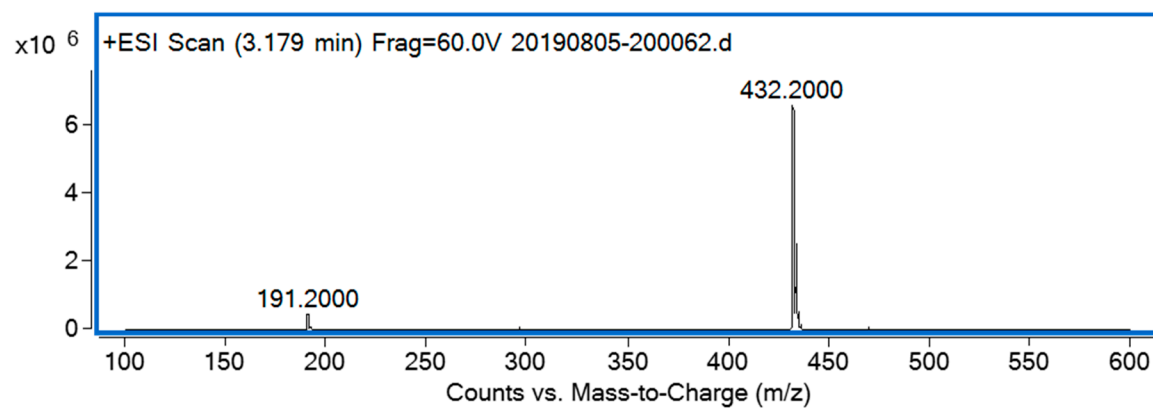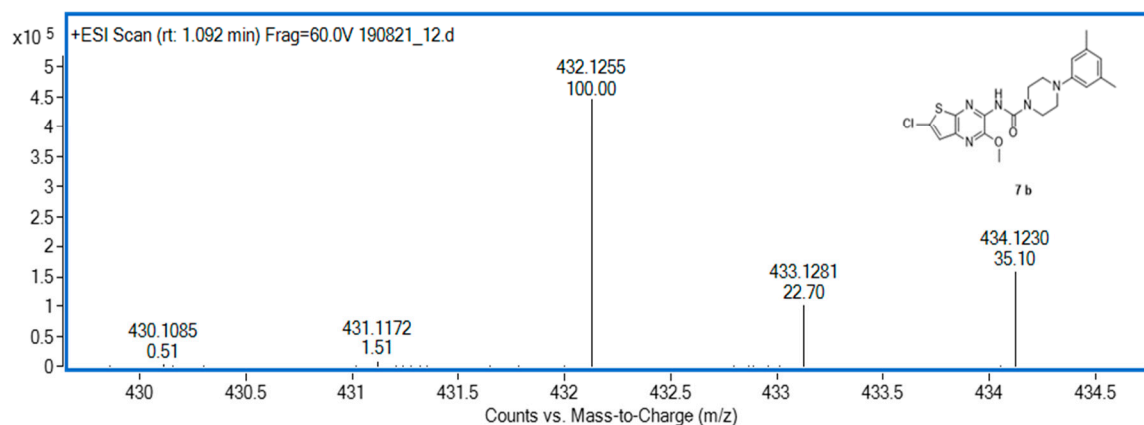

LC/MS, HR/MS-7b

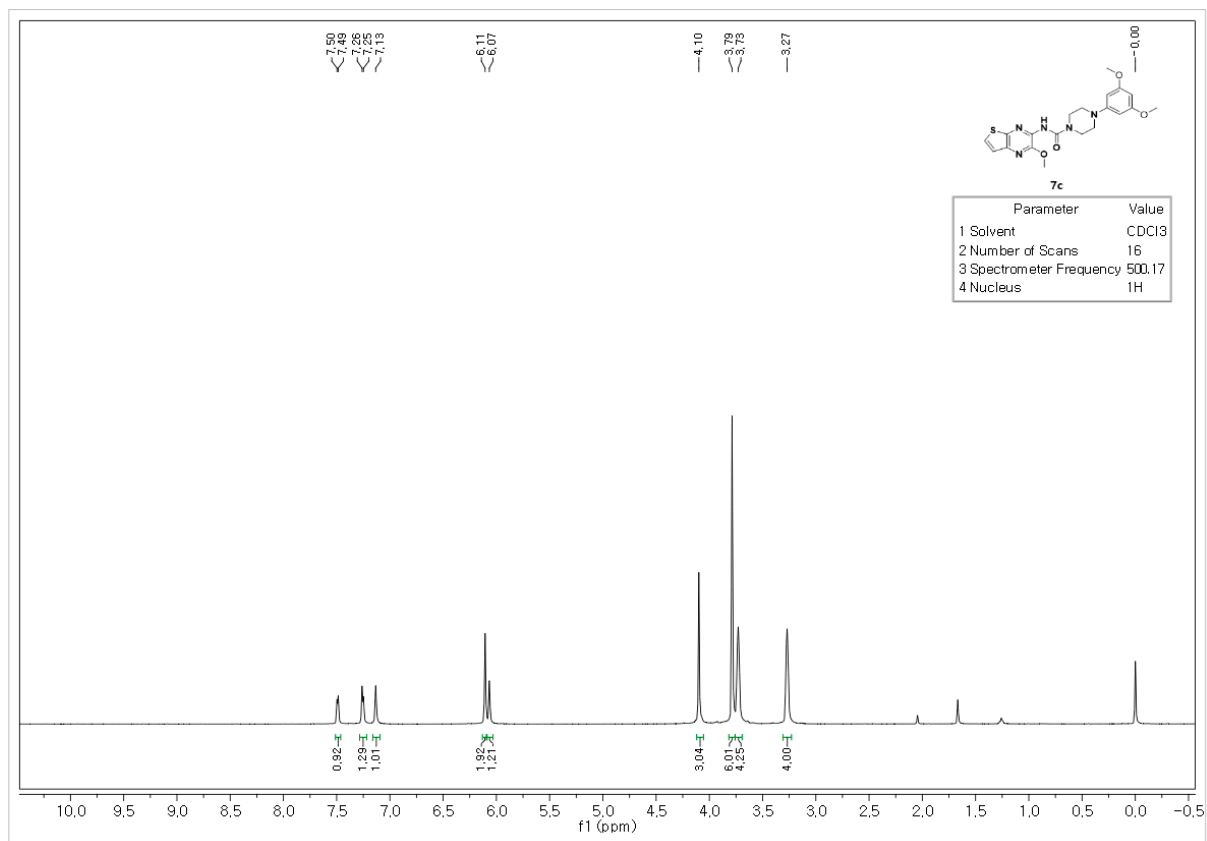

<sup>1</sup>H-NMR-7c

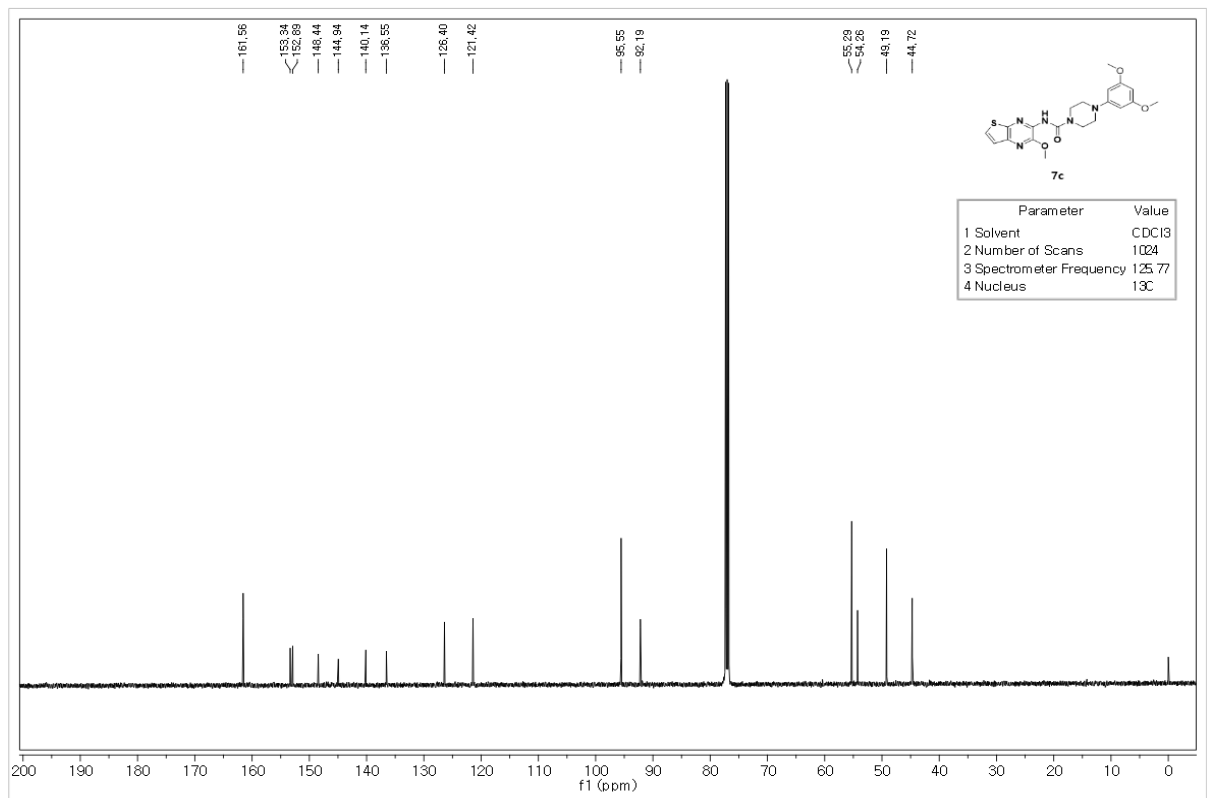

<sup>13</sup>C-NMR-7c

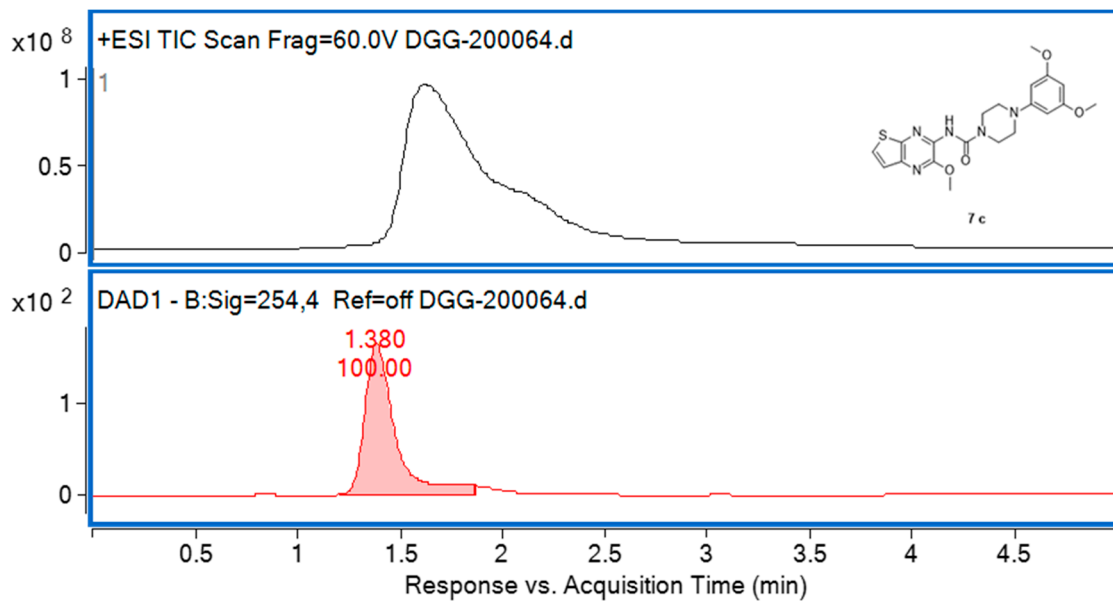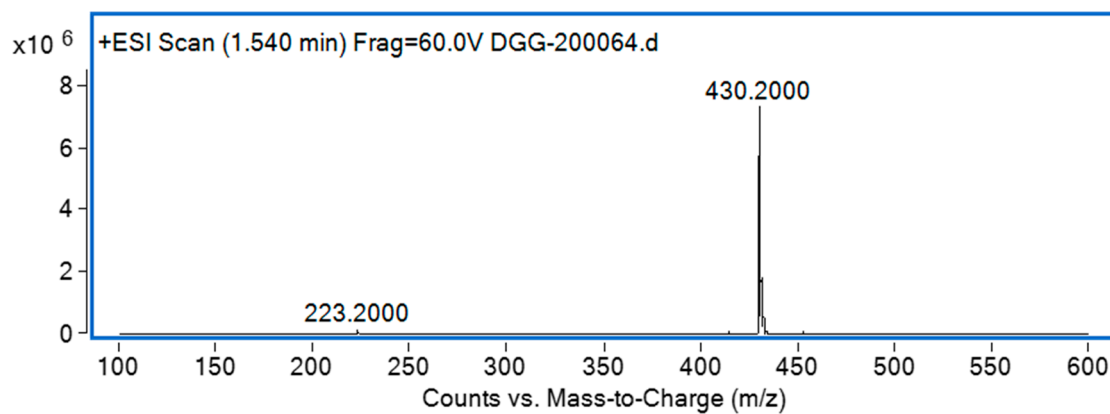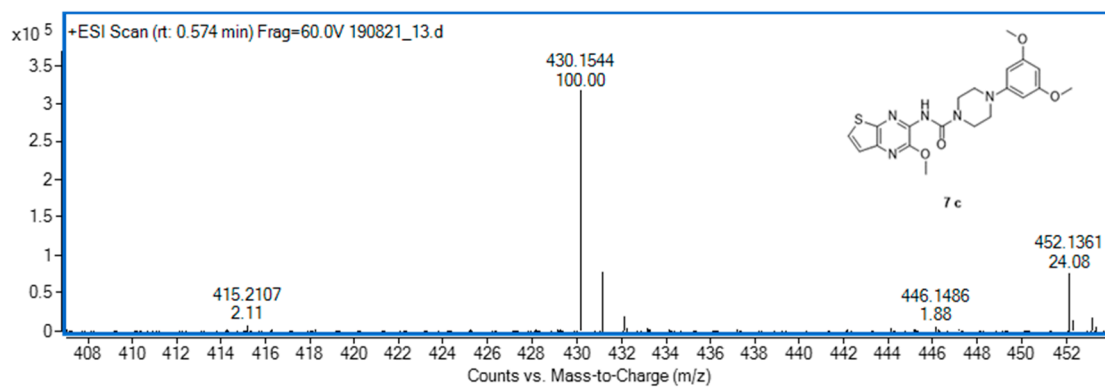

LC/MS, HR/MS-7c

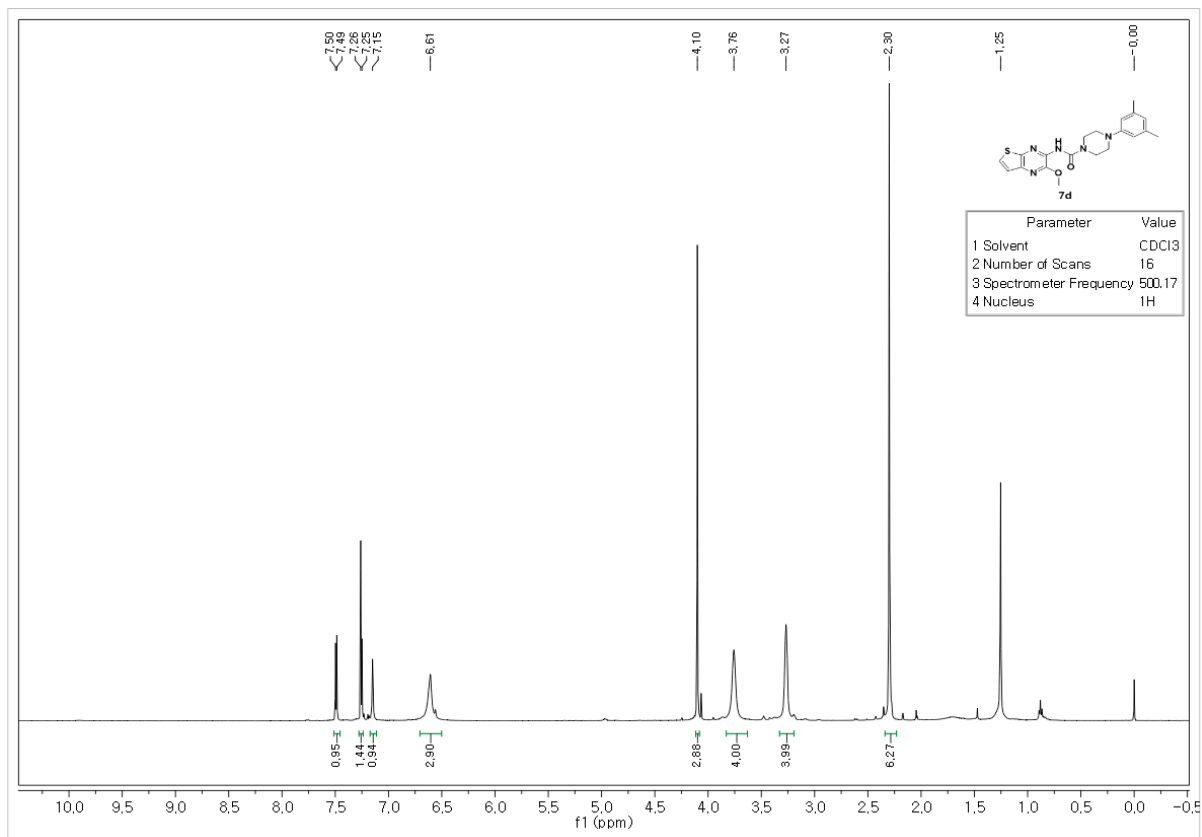

**<sup>1</sup>H-NMR-7d**

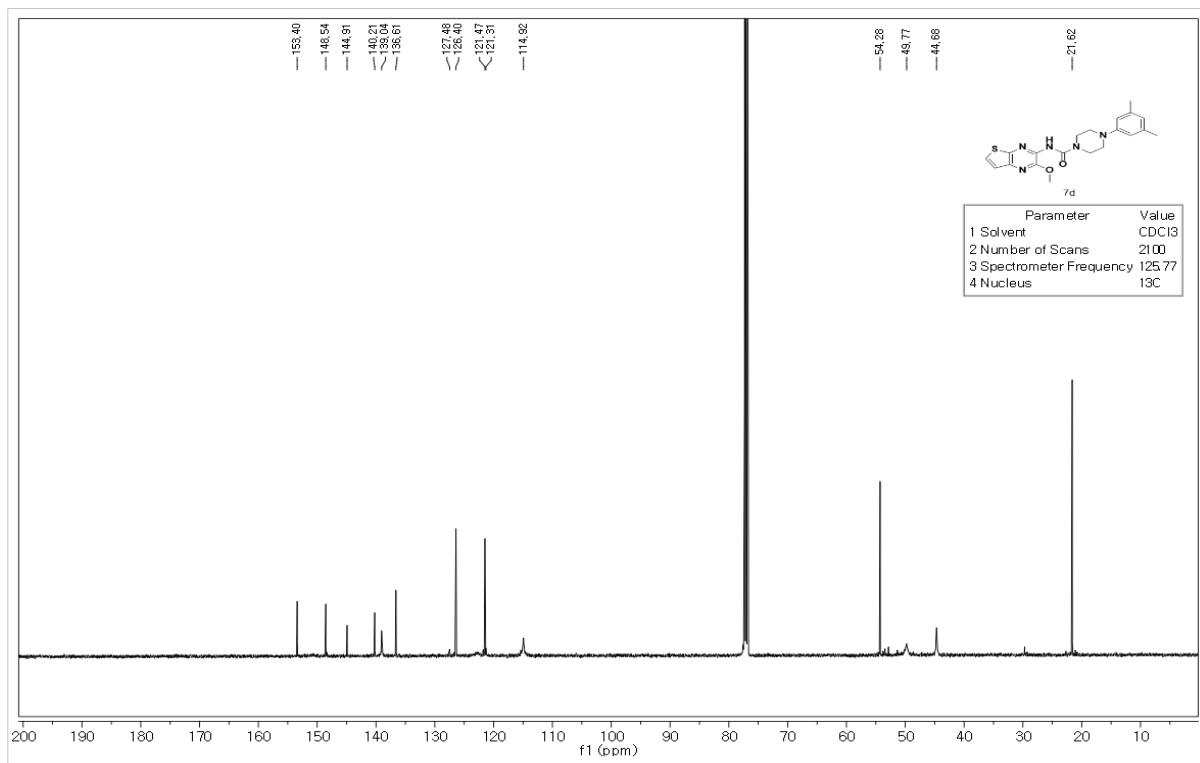

**<sup>13</sup>C-NMR-7d**



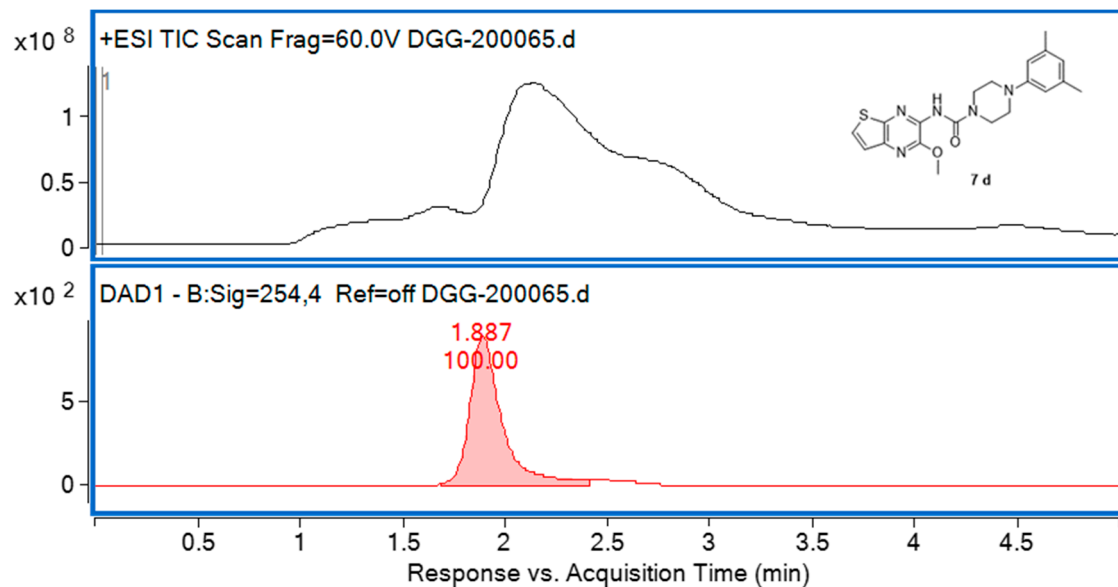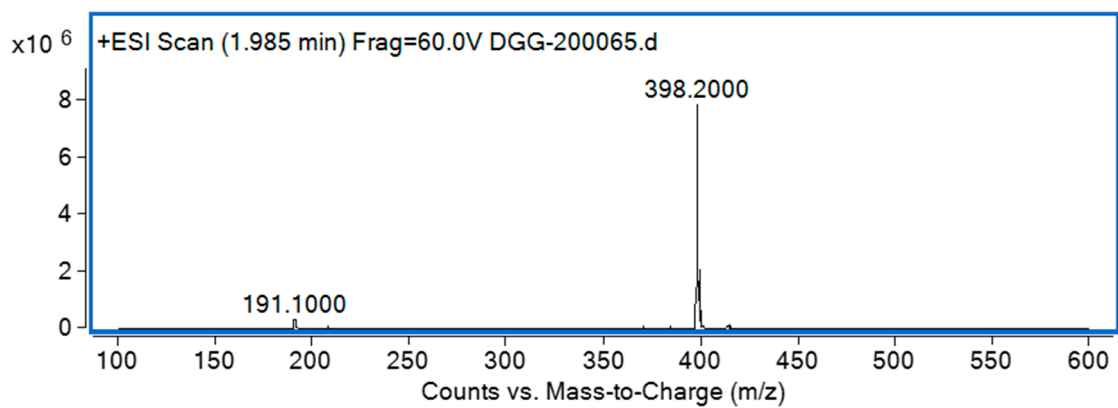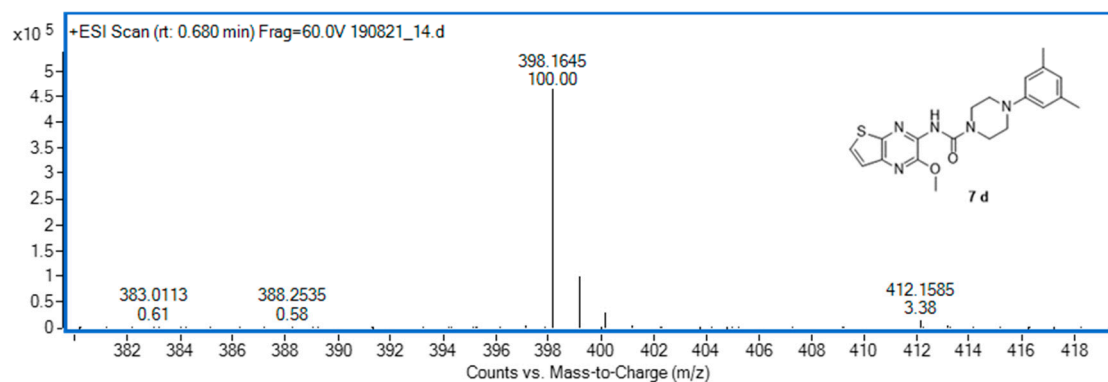

LC/MS, HR/MS-7d

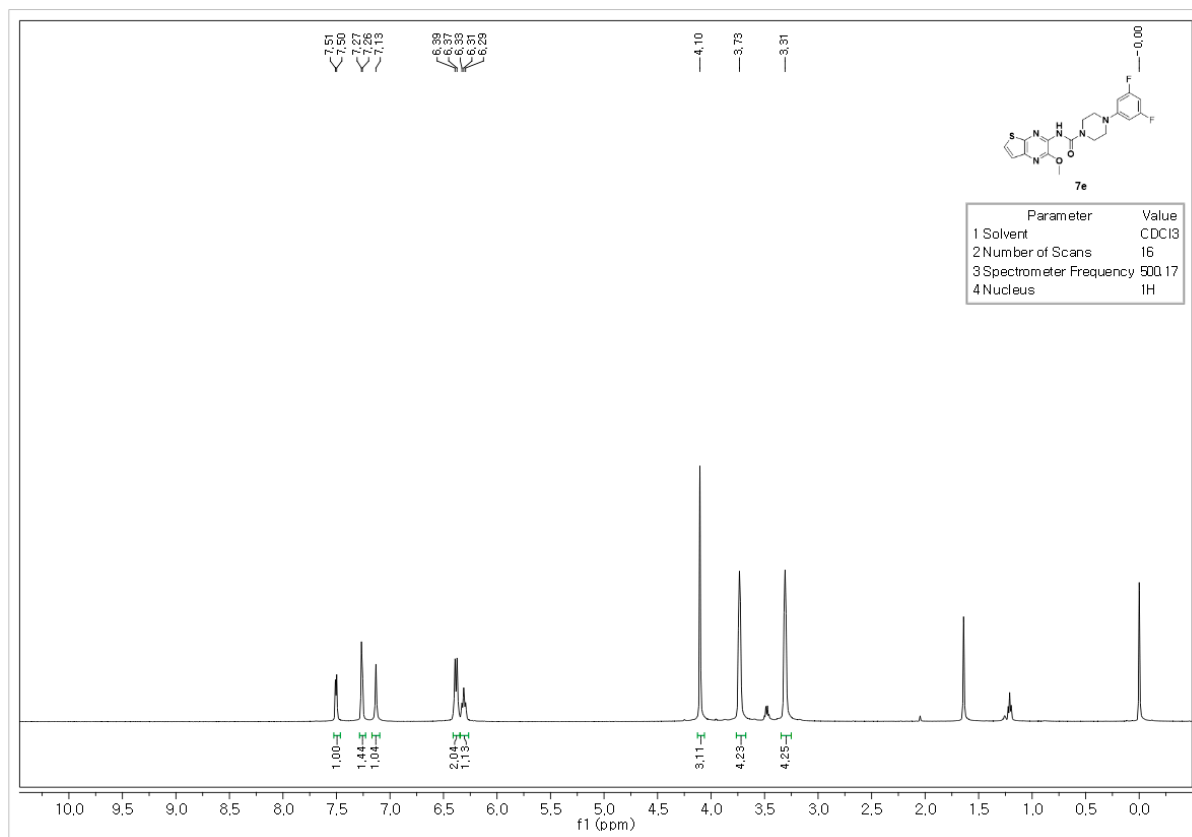

**<sup>1</sup>H-NMR-7e**

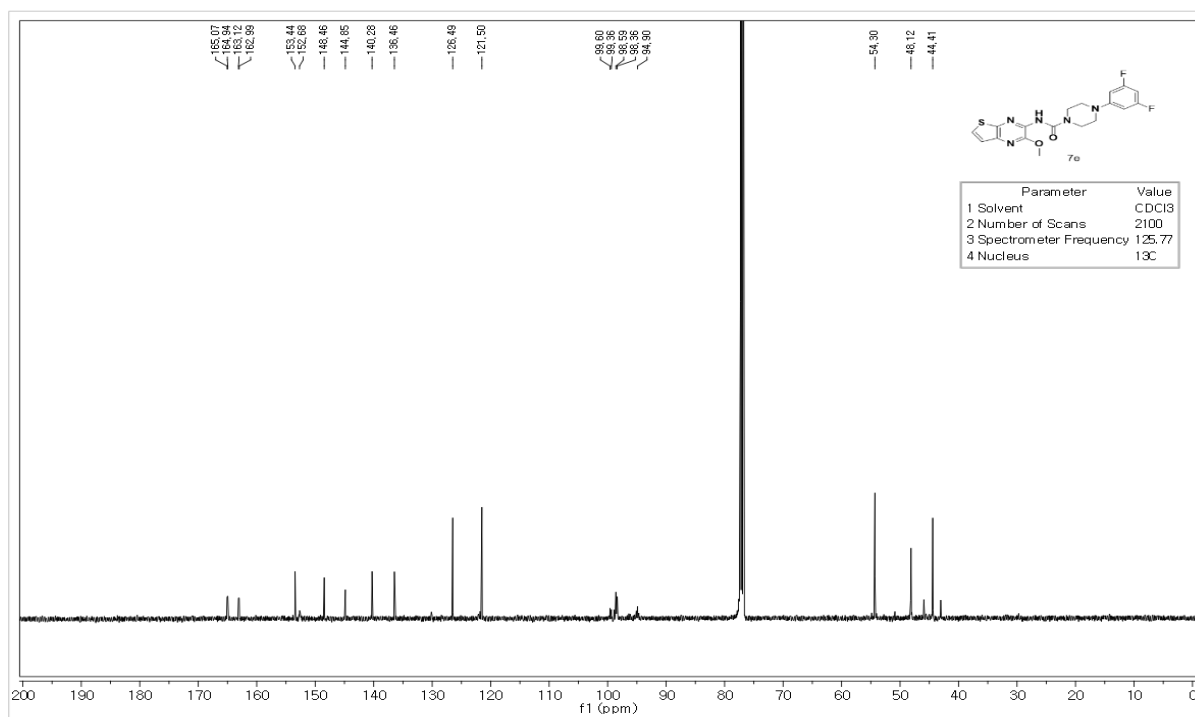

**<sup>13</sup>C-NMR-7e**

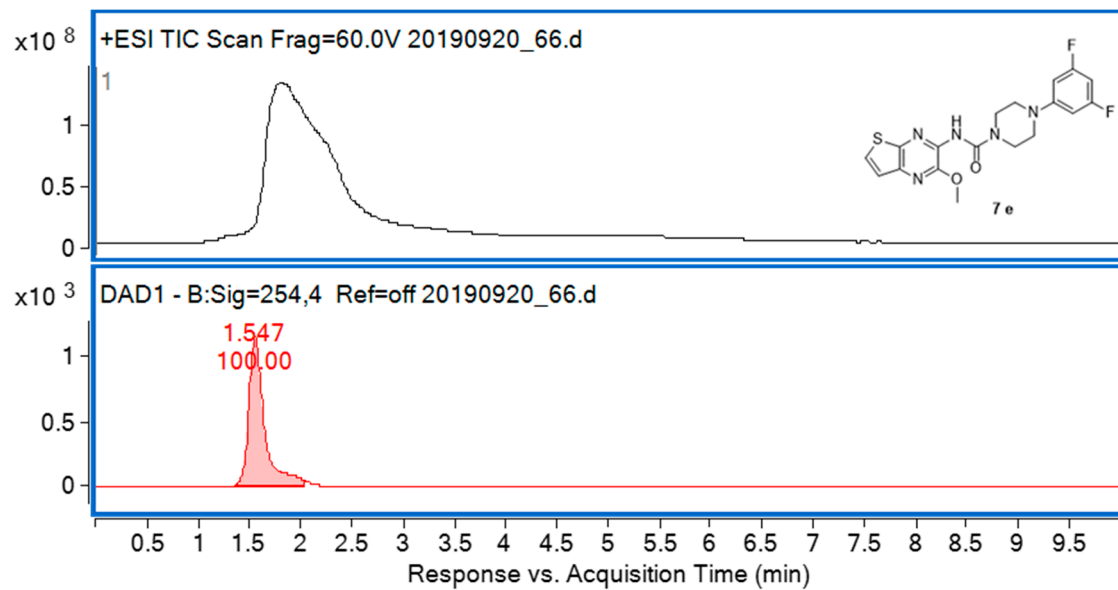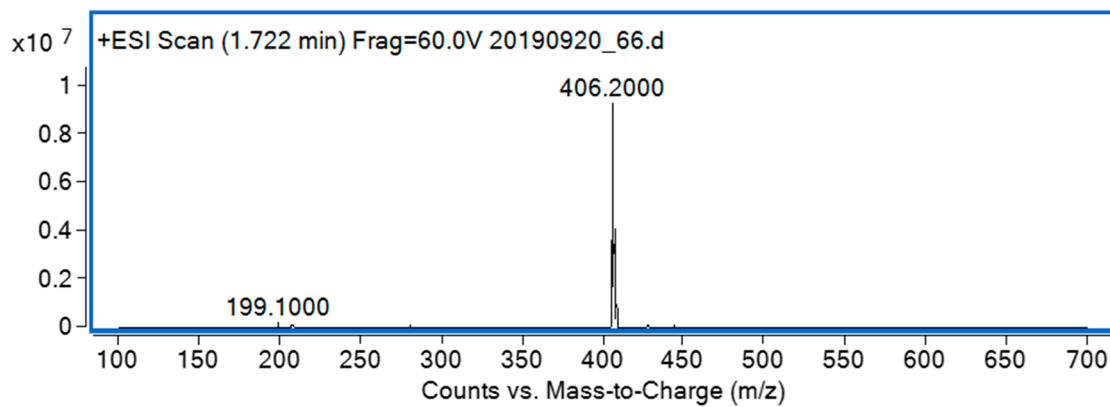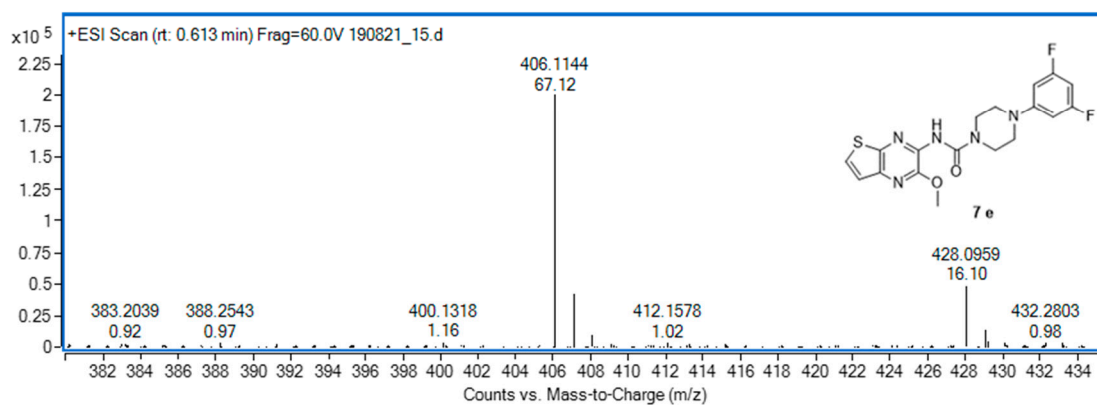

LC/MS, HR/MS-7e

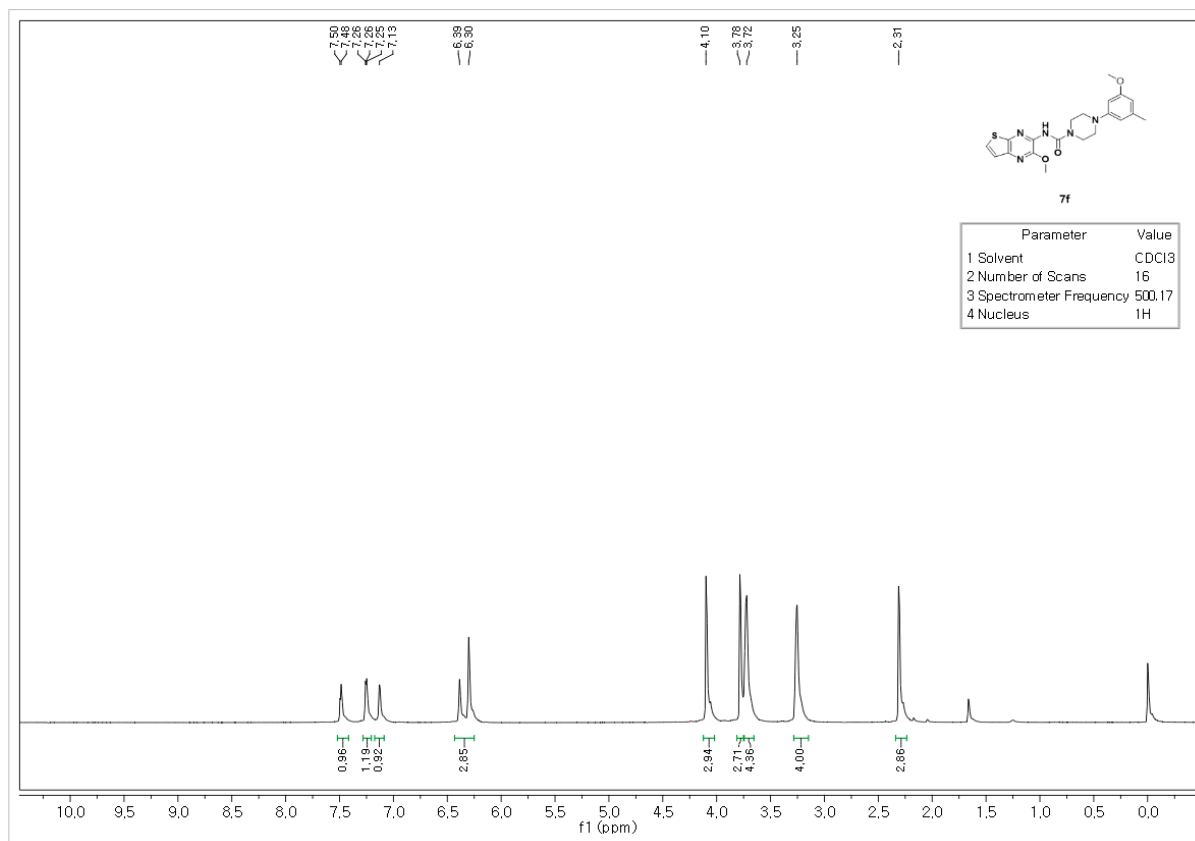

**<sup>1</sup>H-NMR-7f**

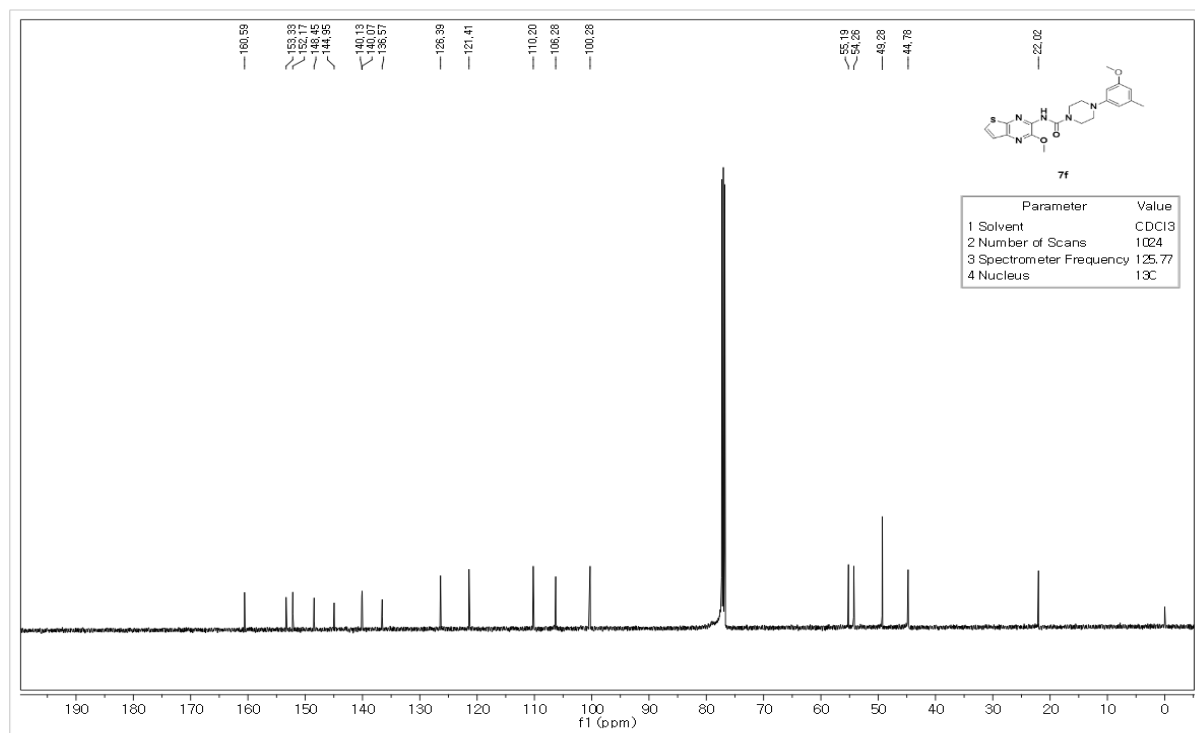

**<sup>13</sup>C-NMR-7f**

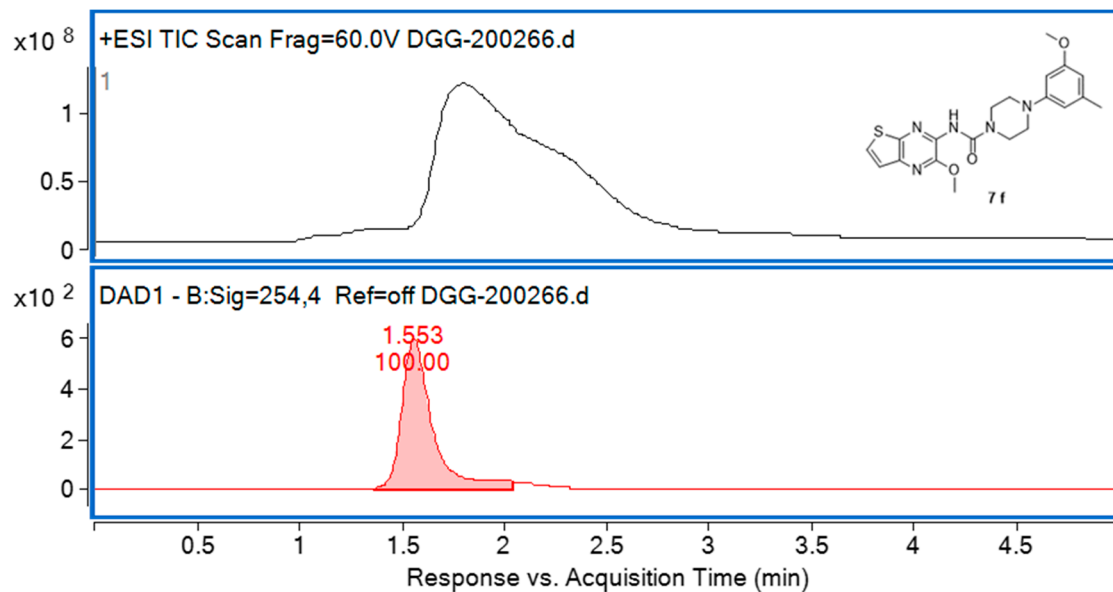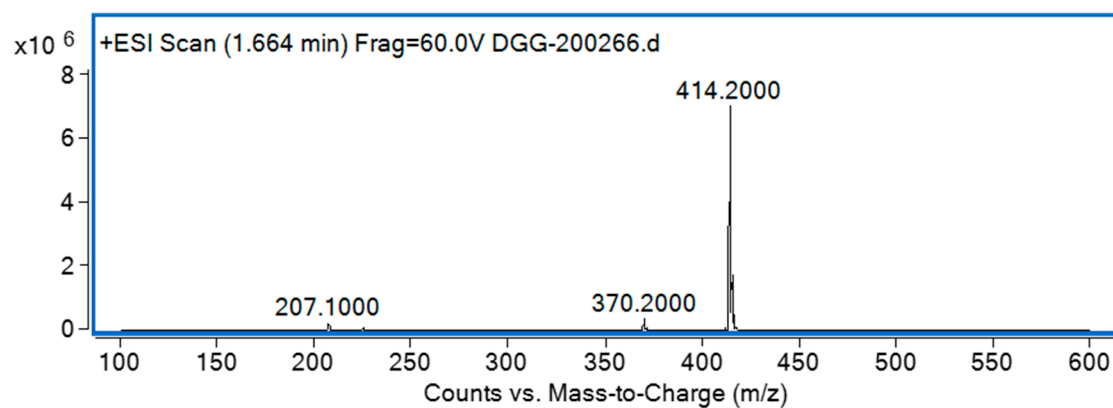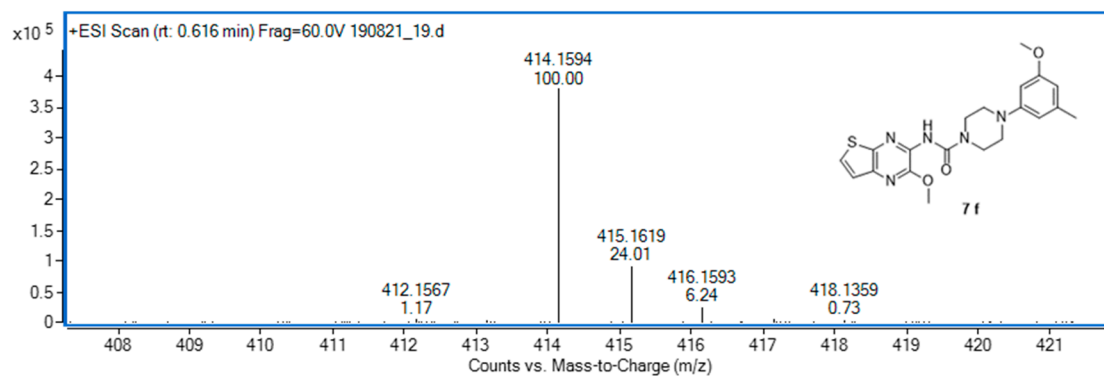

LC/MS, HR/MS-7f

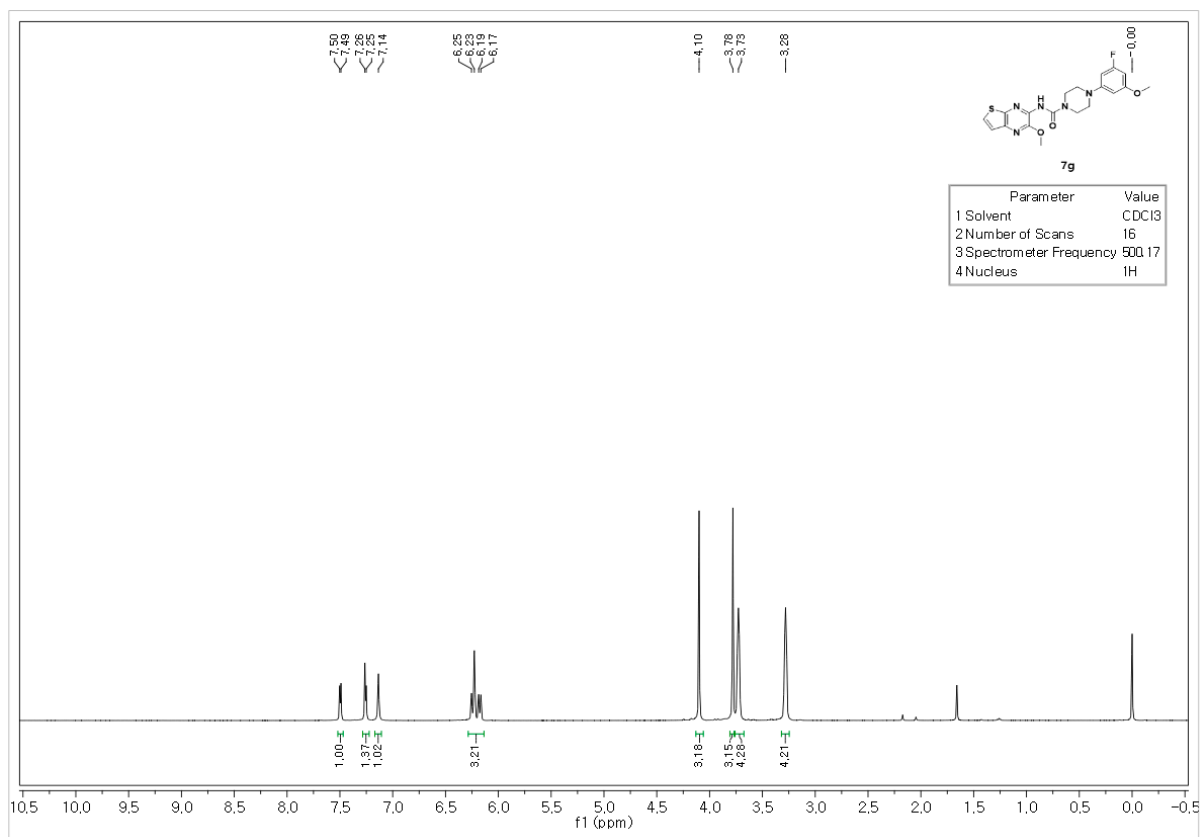

<sup>1</sup>H-NMR-7g

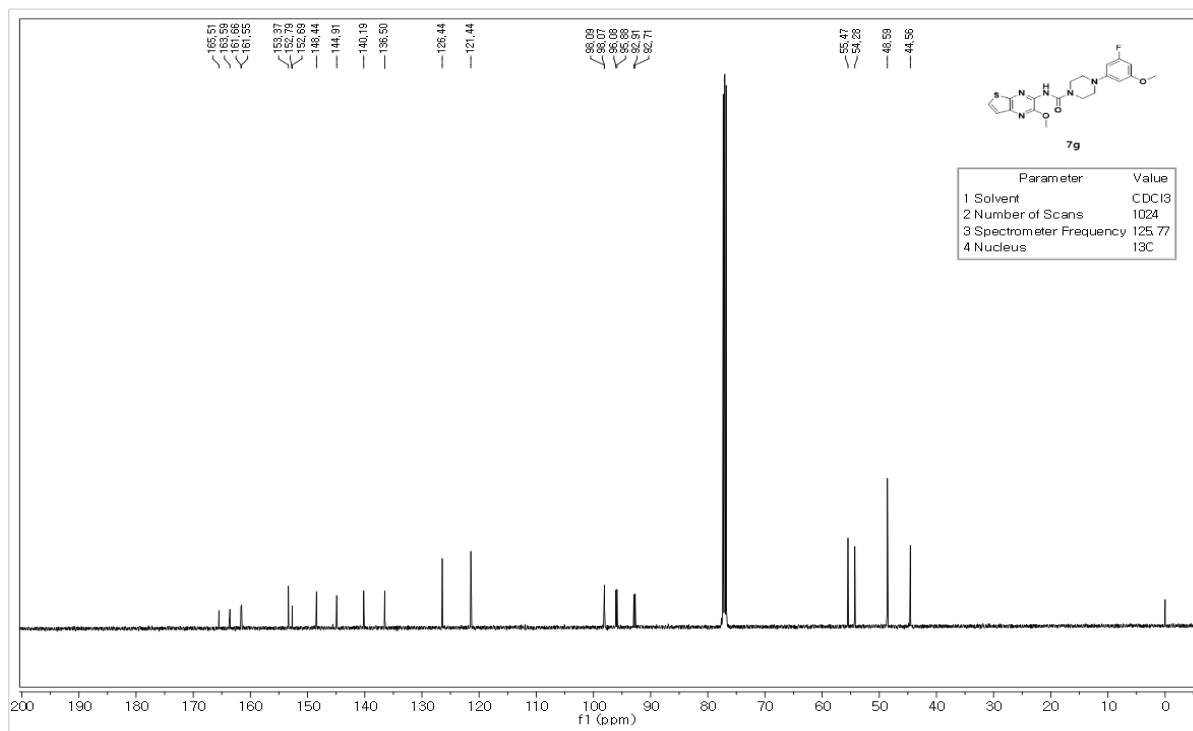

<sup>13</sup>C-NMR-7g

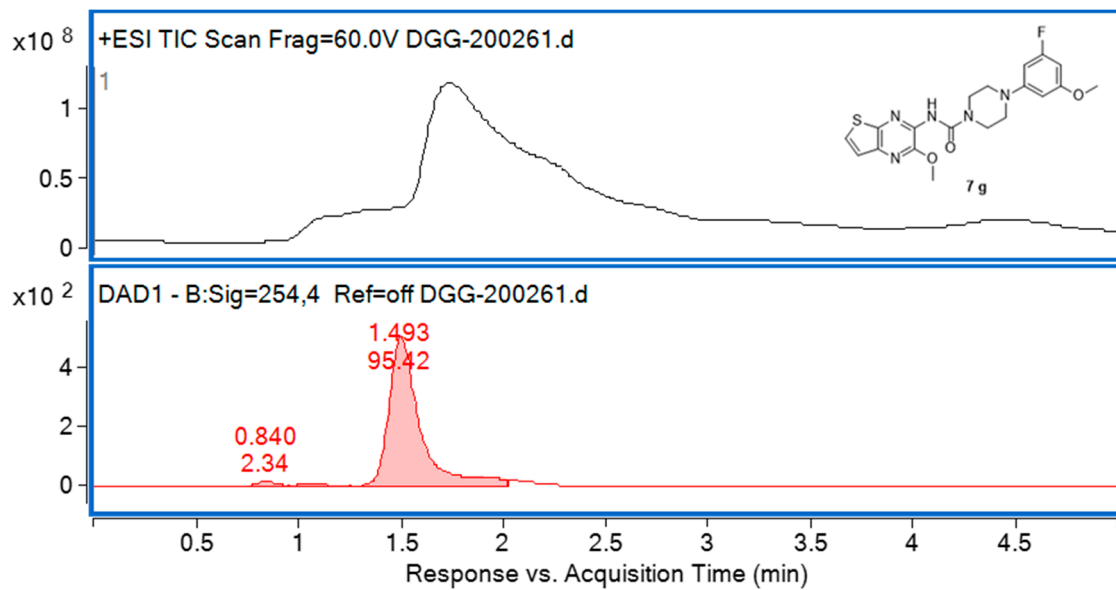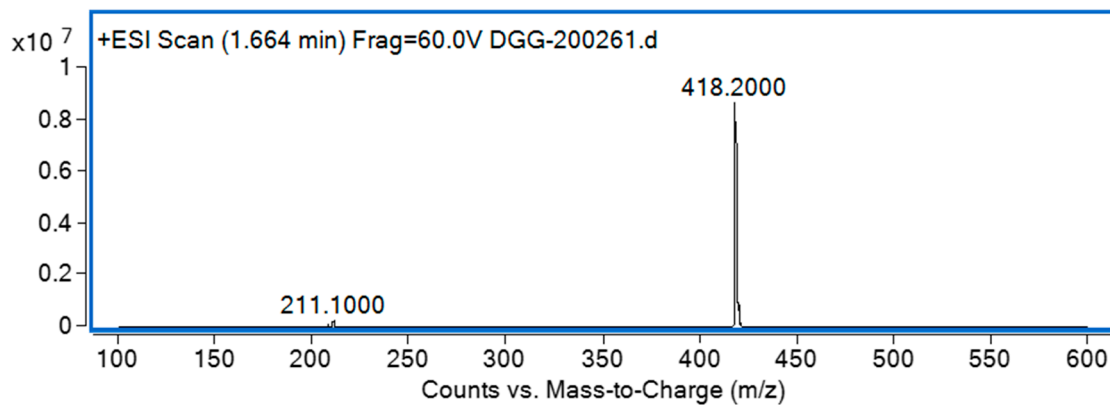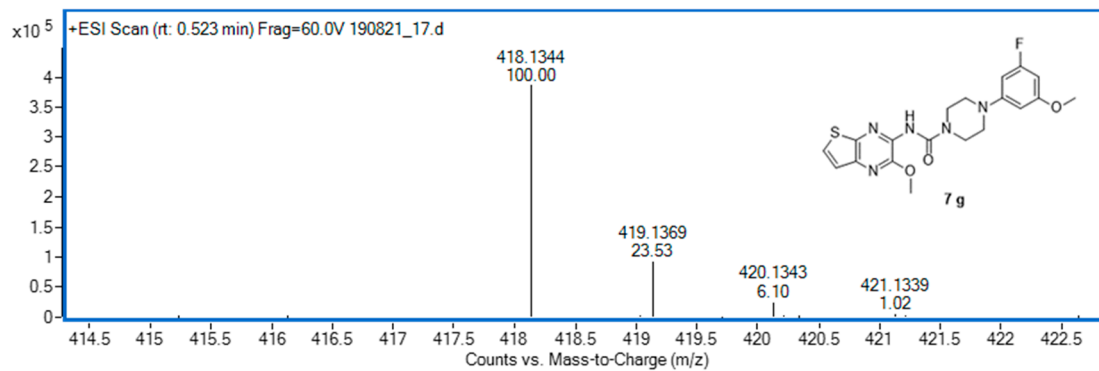

**LC/MS, HR/MS-7g**

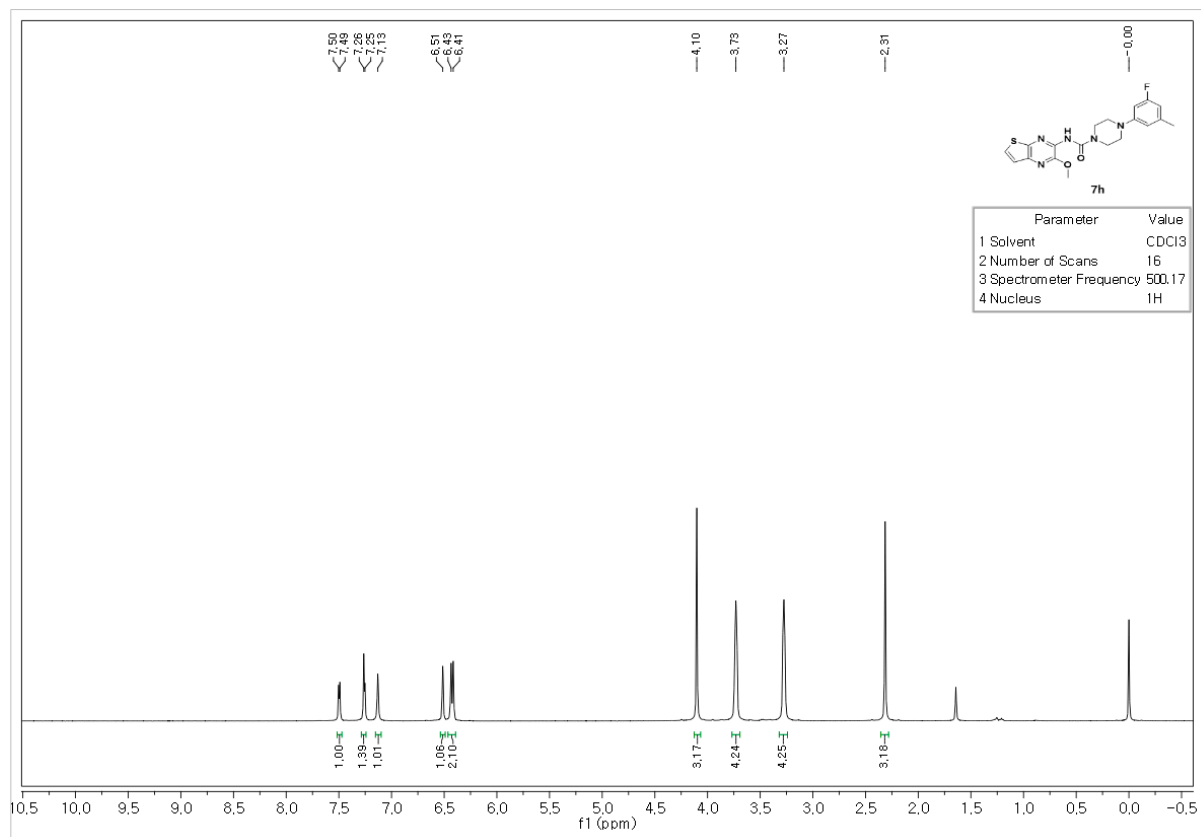

<sup>1</sup>H-NMR-7h

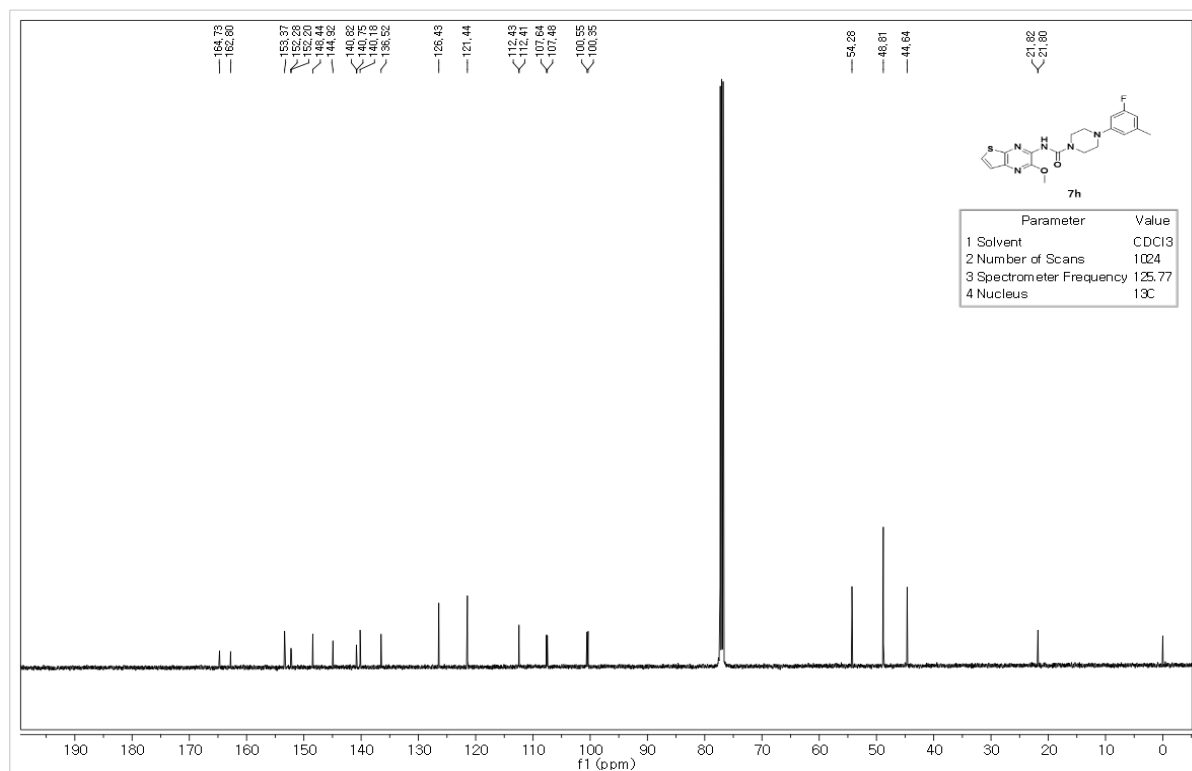

<sup>13</sup>C-NMR-7h



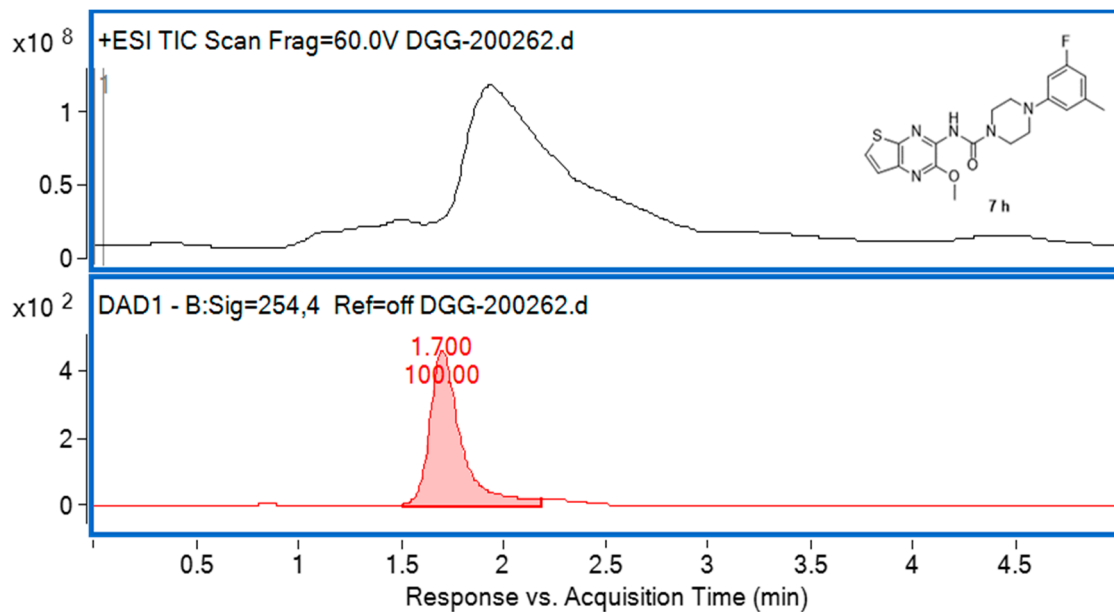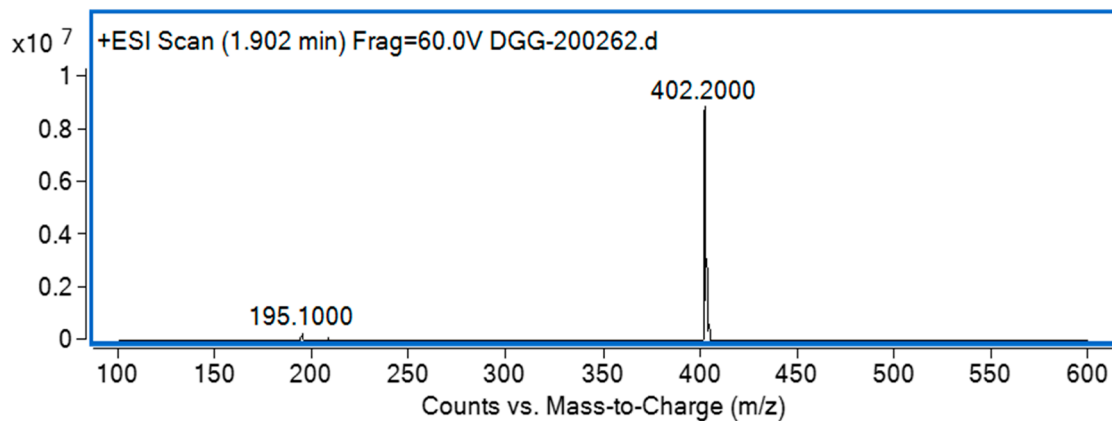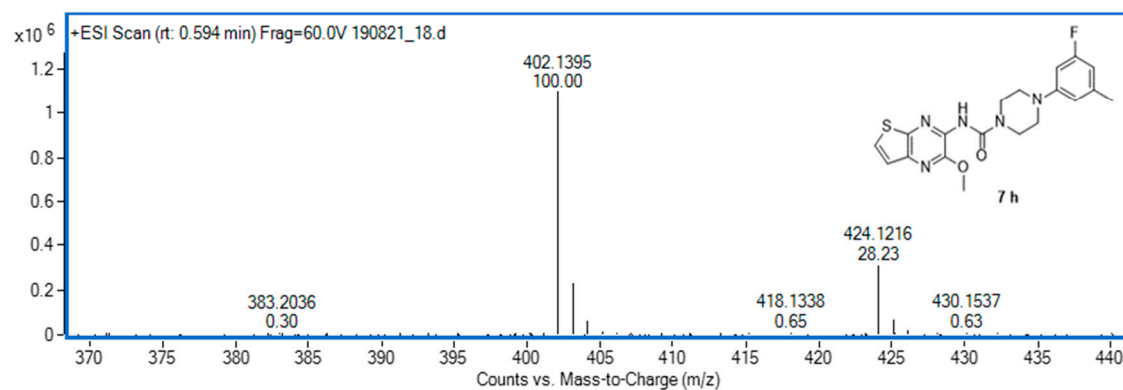

LC/MS, HR/MS-7h

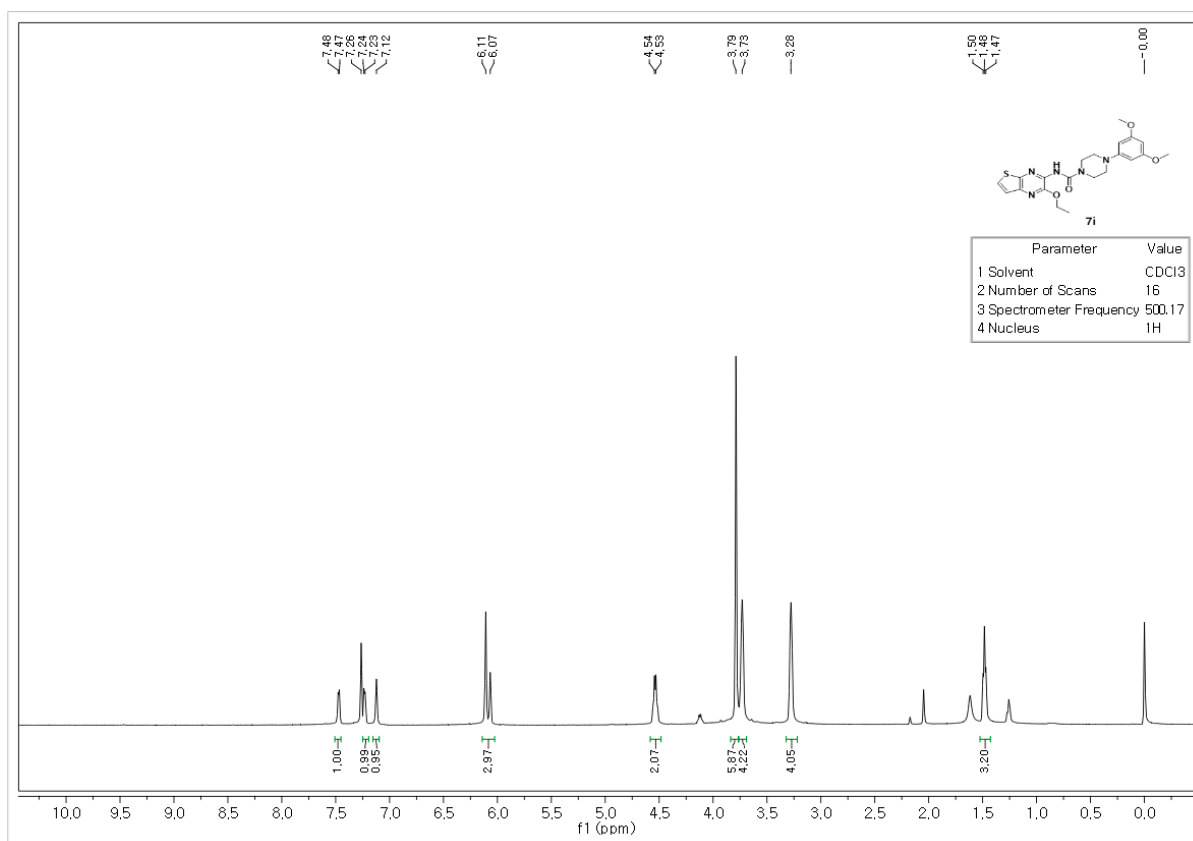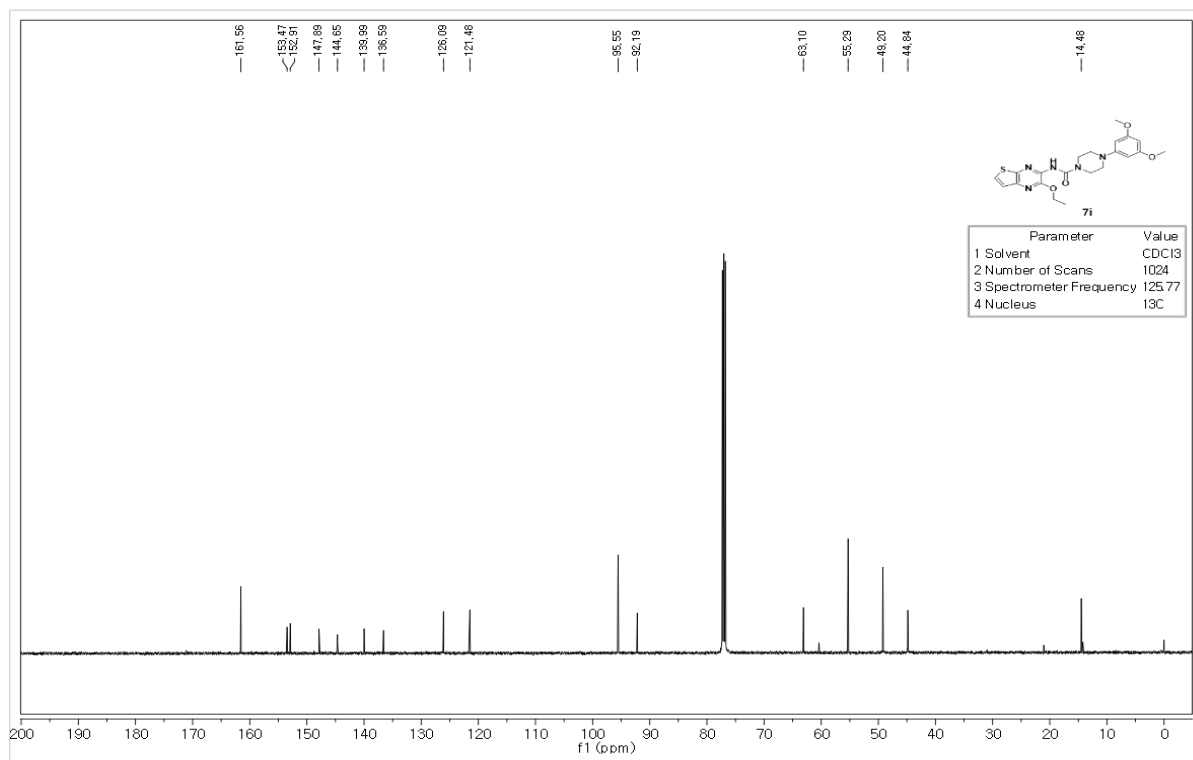

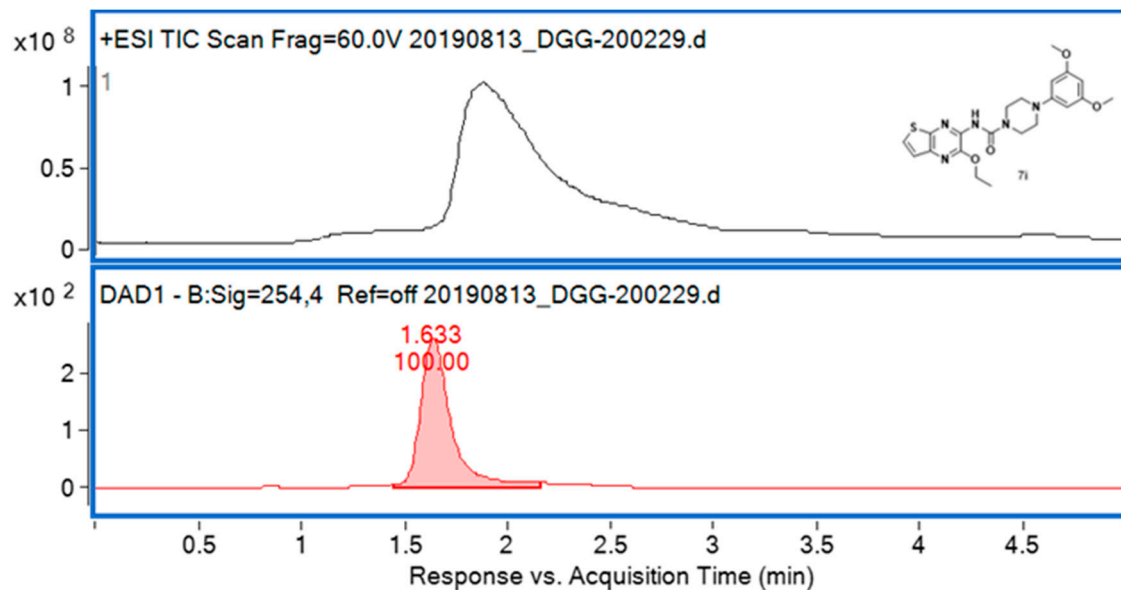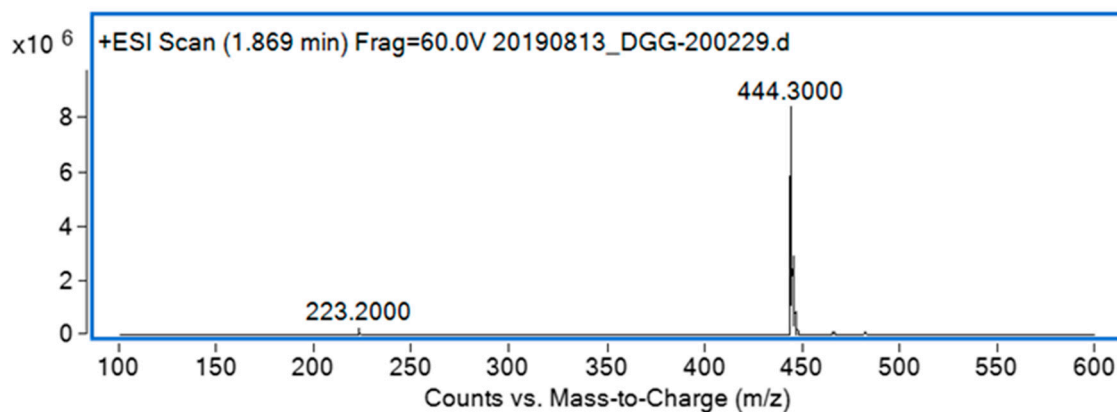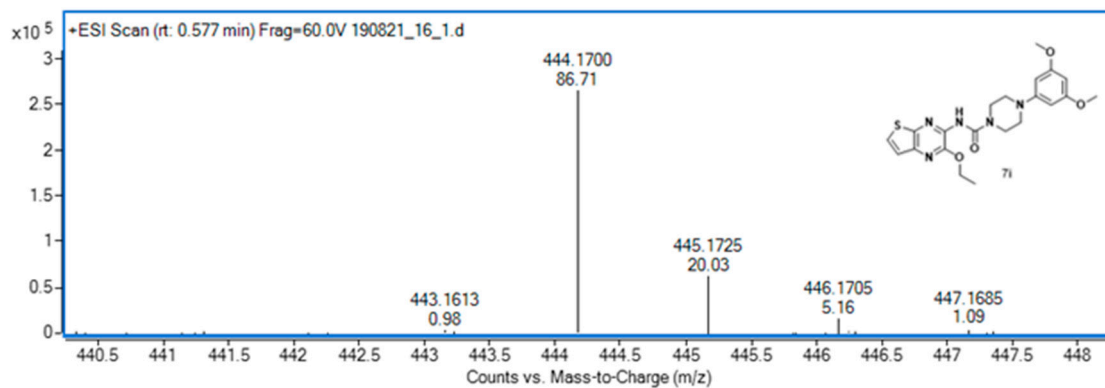

LC/MS, HR/MS-7i

## 2. Figures S1 and S2.

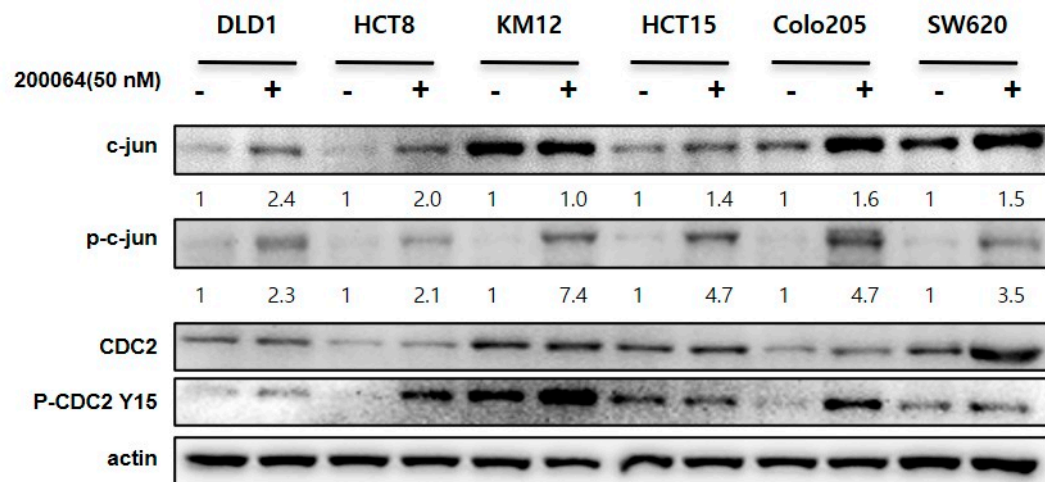

**Figure S1.** DGG200064 induced cell cycle arrest on colon cancer cells.

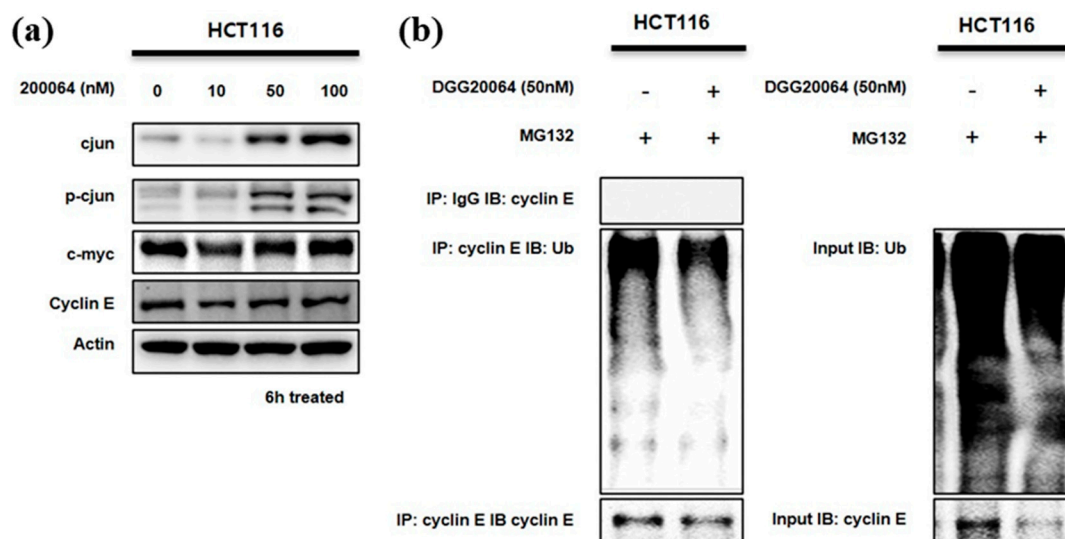

**Figure S2.** (a) DGG200064 dose-dependently induces c-Jun on HCT116 cells; (b) DGG200064 does not affect the ubiquitination of cyclin E.

### 3. Raw Biological Data

DLD1\_DMSO\_6h

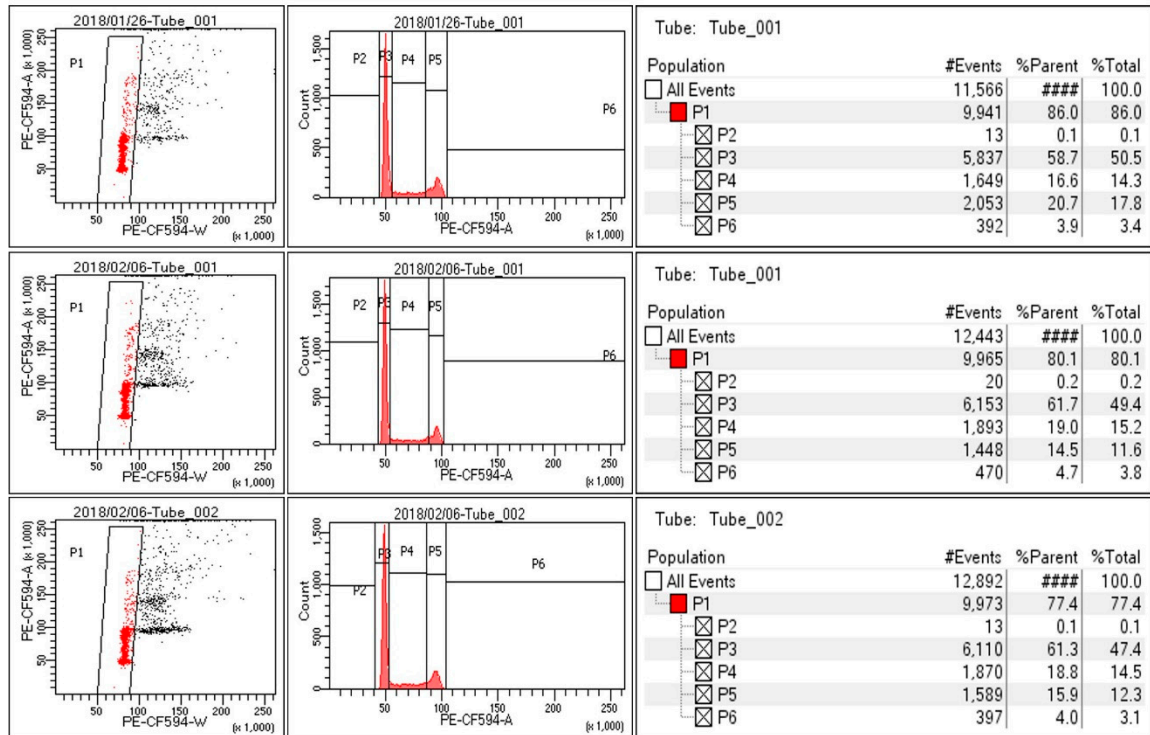

DLD1\_DGG20064\_50nM\_6h

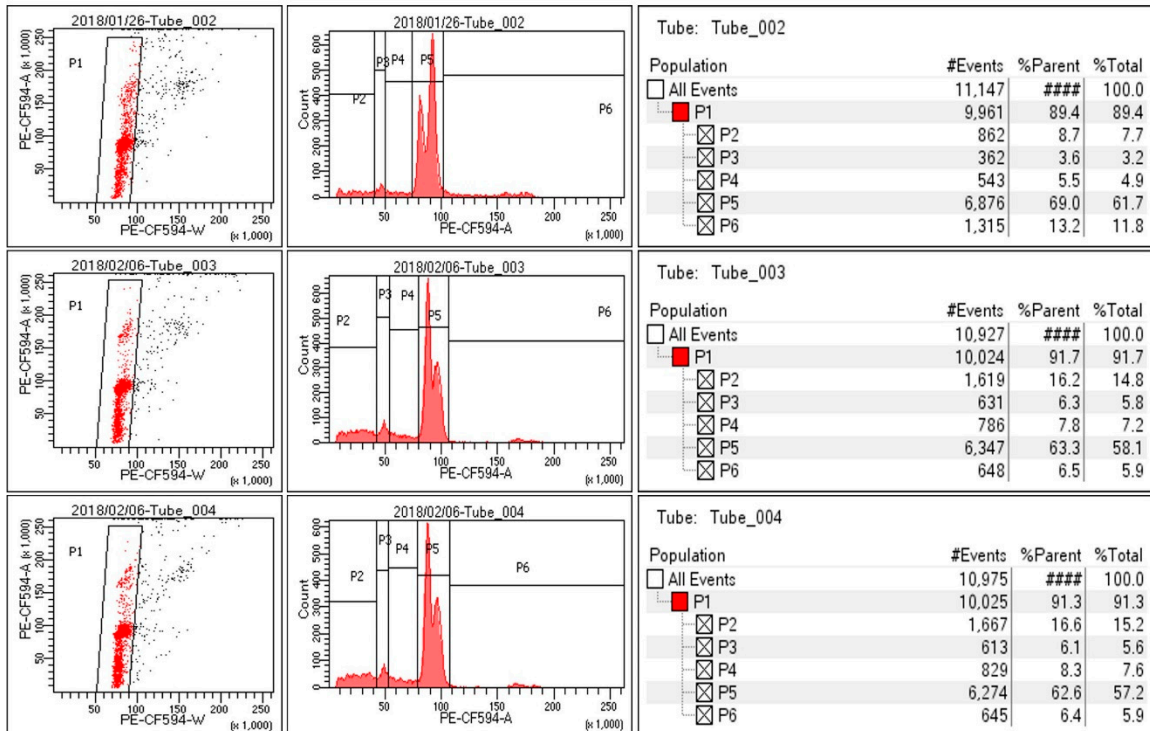

## HCT8\_DMSO\_6h

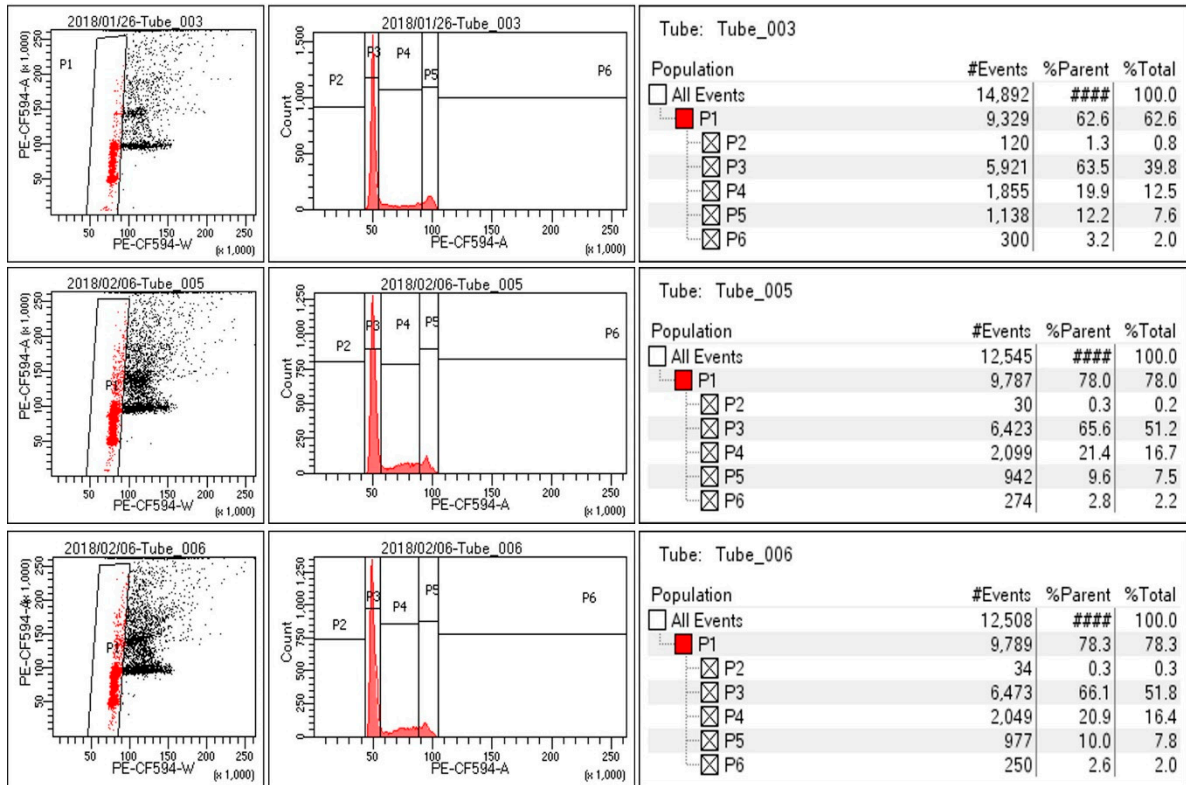

## HCT8\_DGG20064\_50nM\_6h

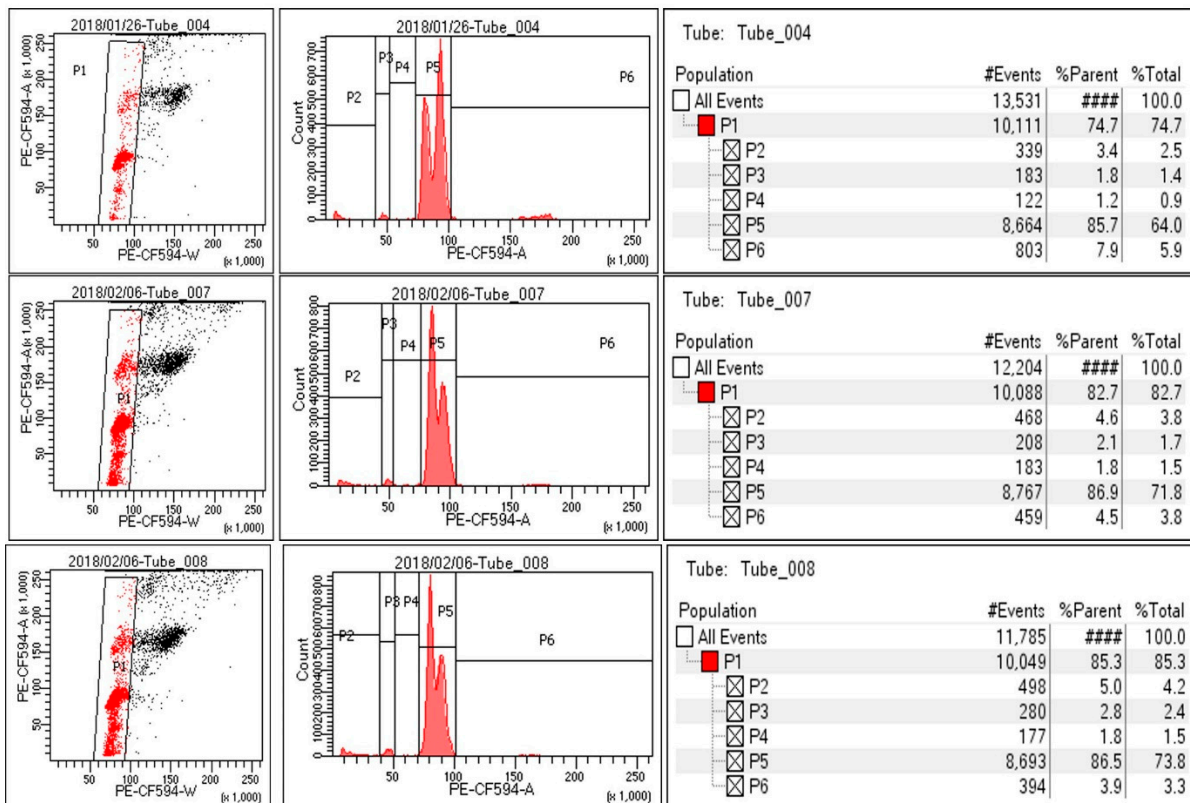



## KM12\_DMSO\_6h

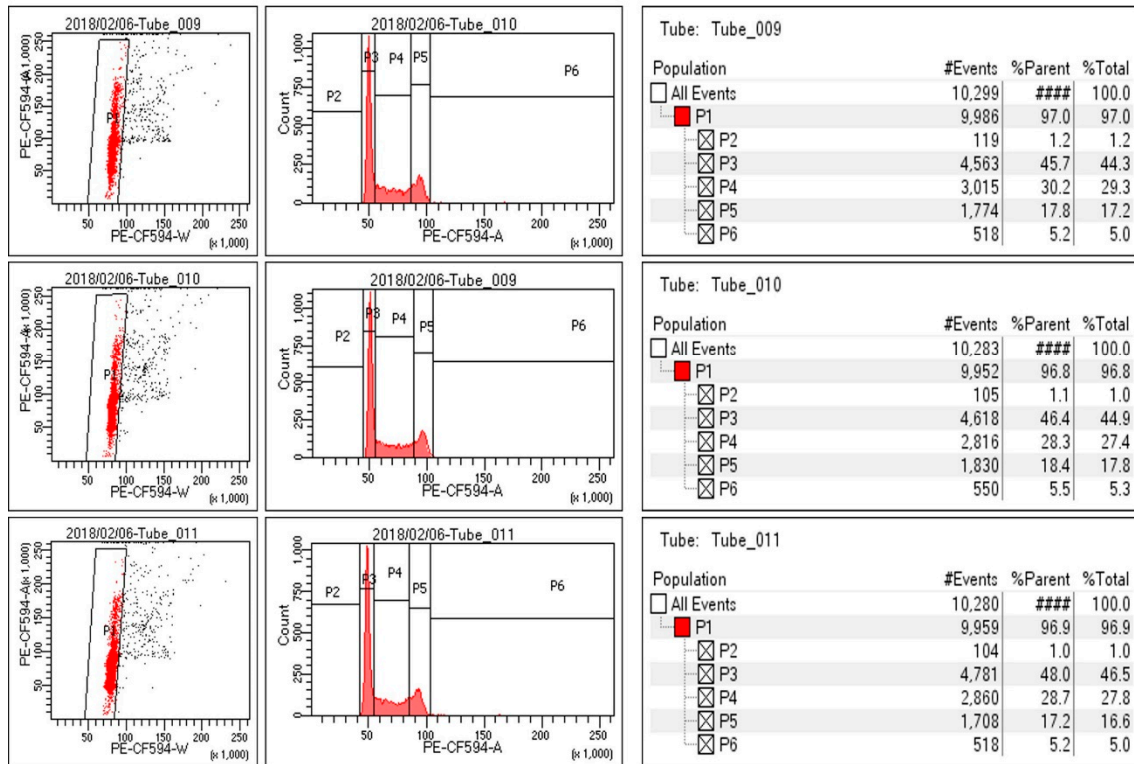

## KM12\_DGG20064\_50nM\_6h

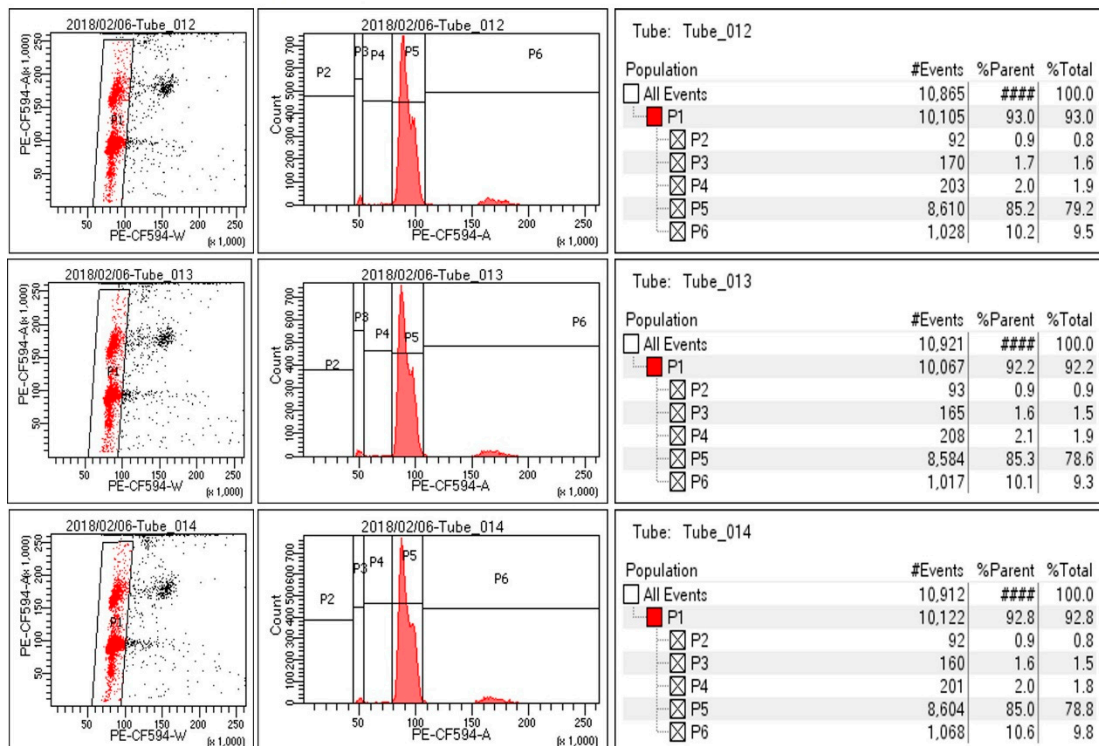

## HCT15\_DMSO\_6h

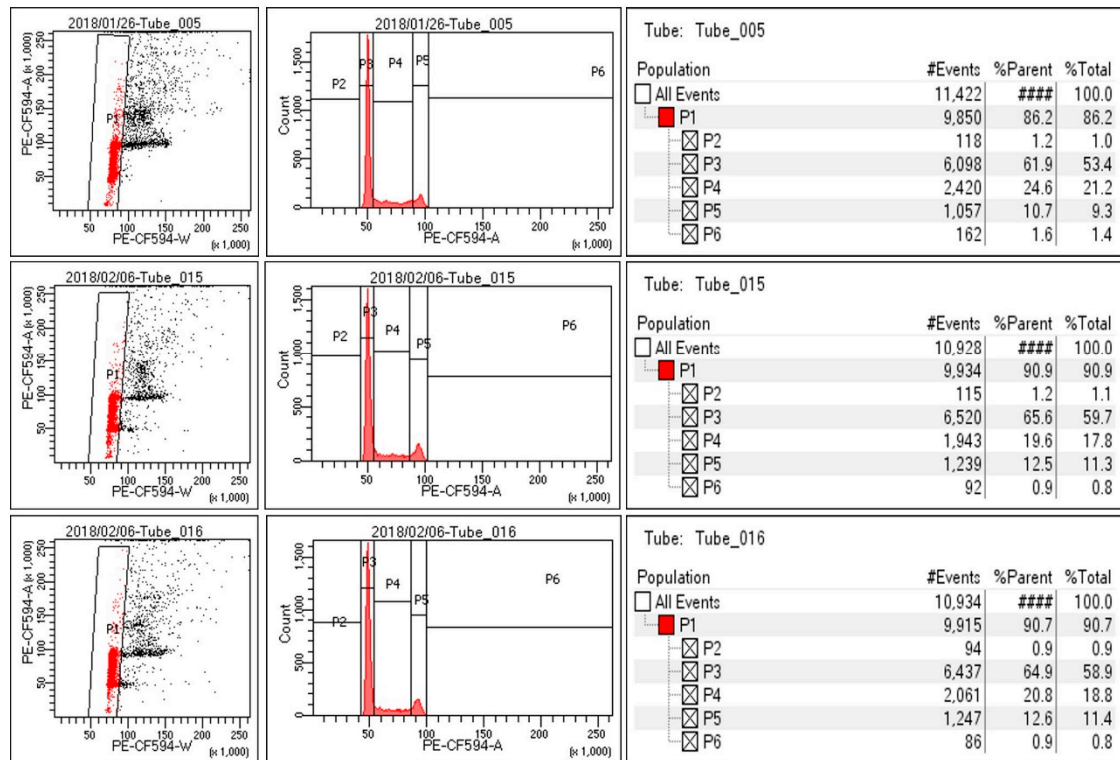

## HCT15\_DGG20064\_50nM\_6h

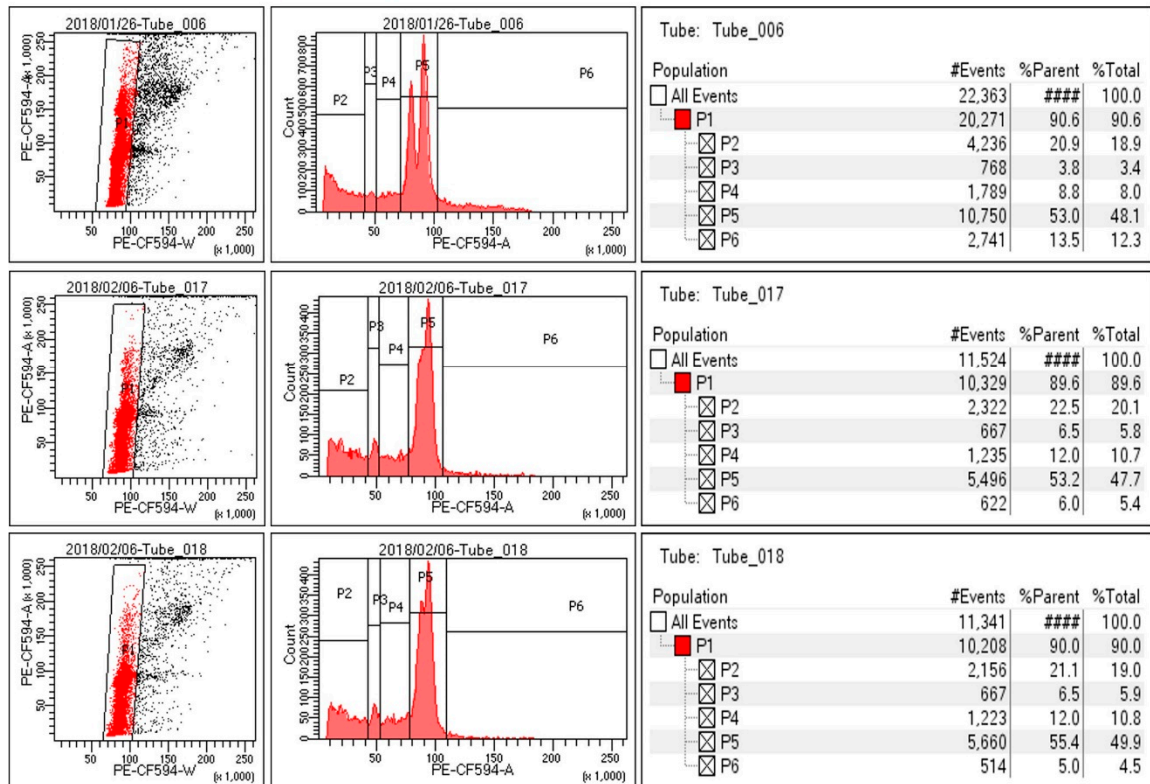



# HT29\_DGG20064\_50nM\_6h

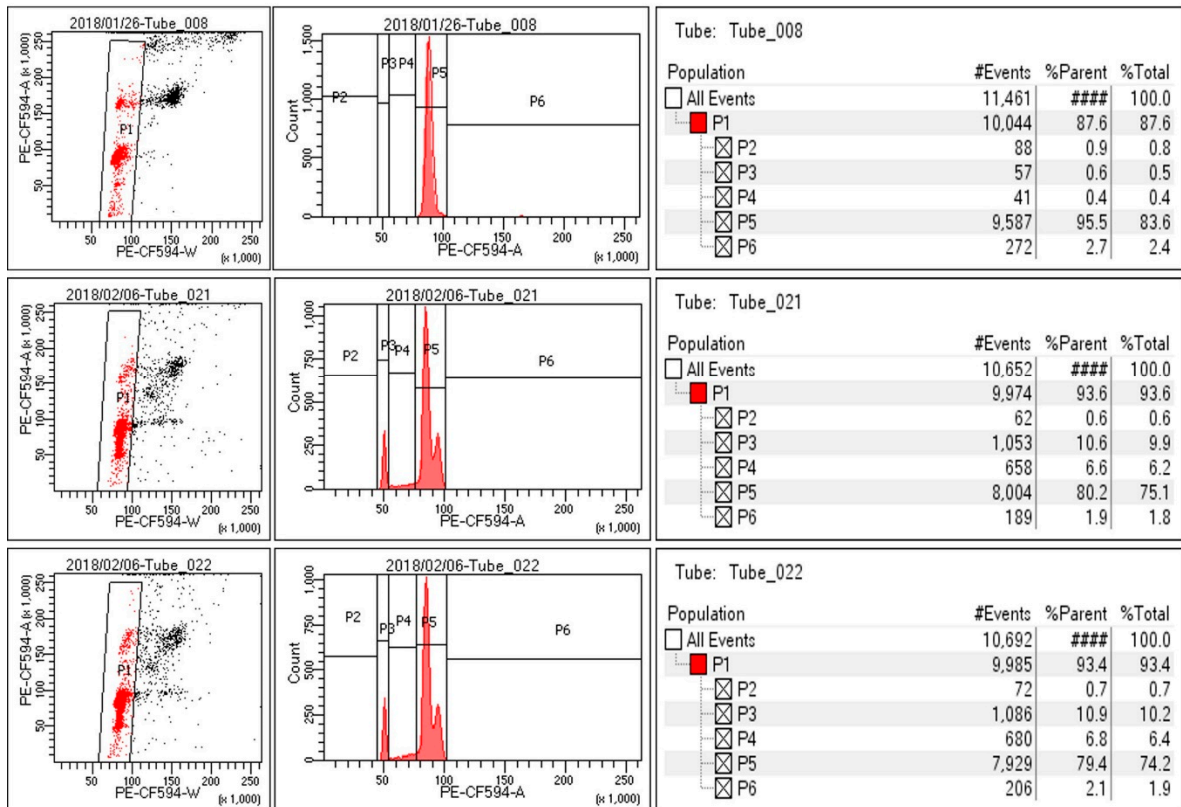

# HT29\_DGG20064\_50nM\_6h

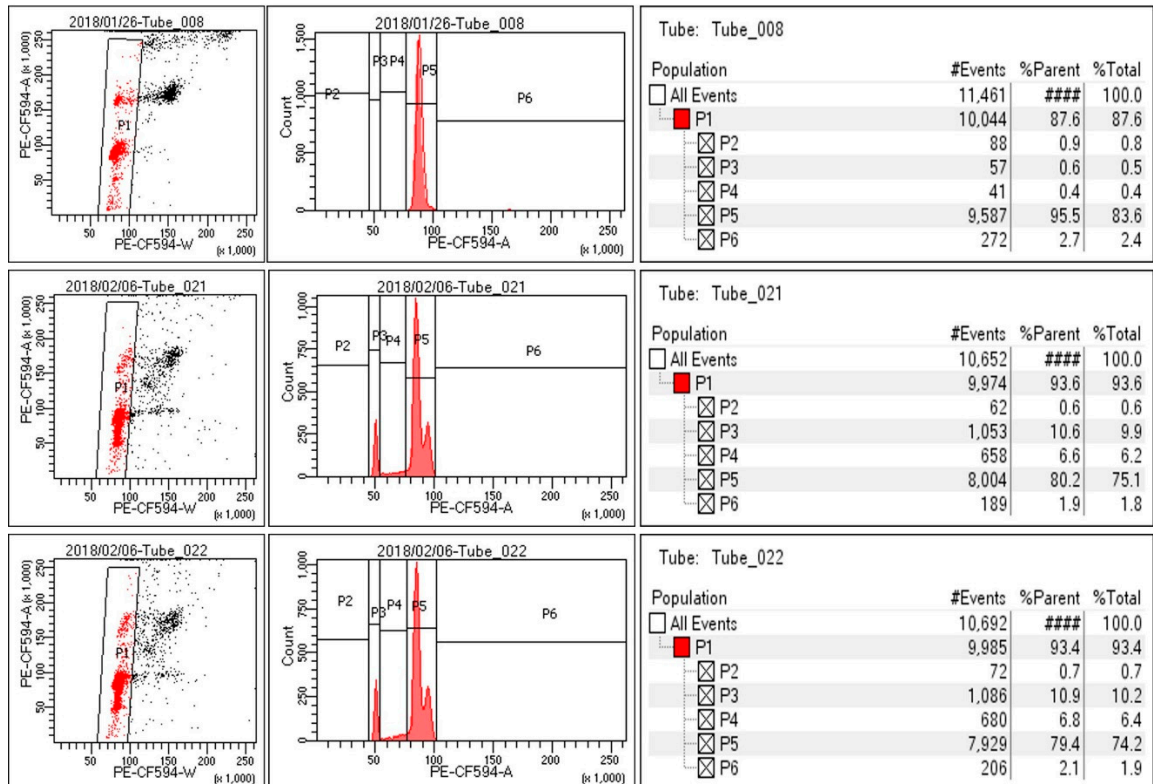

## COLO-205\_DMSO\_6h

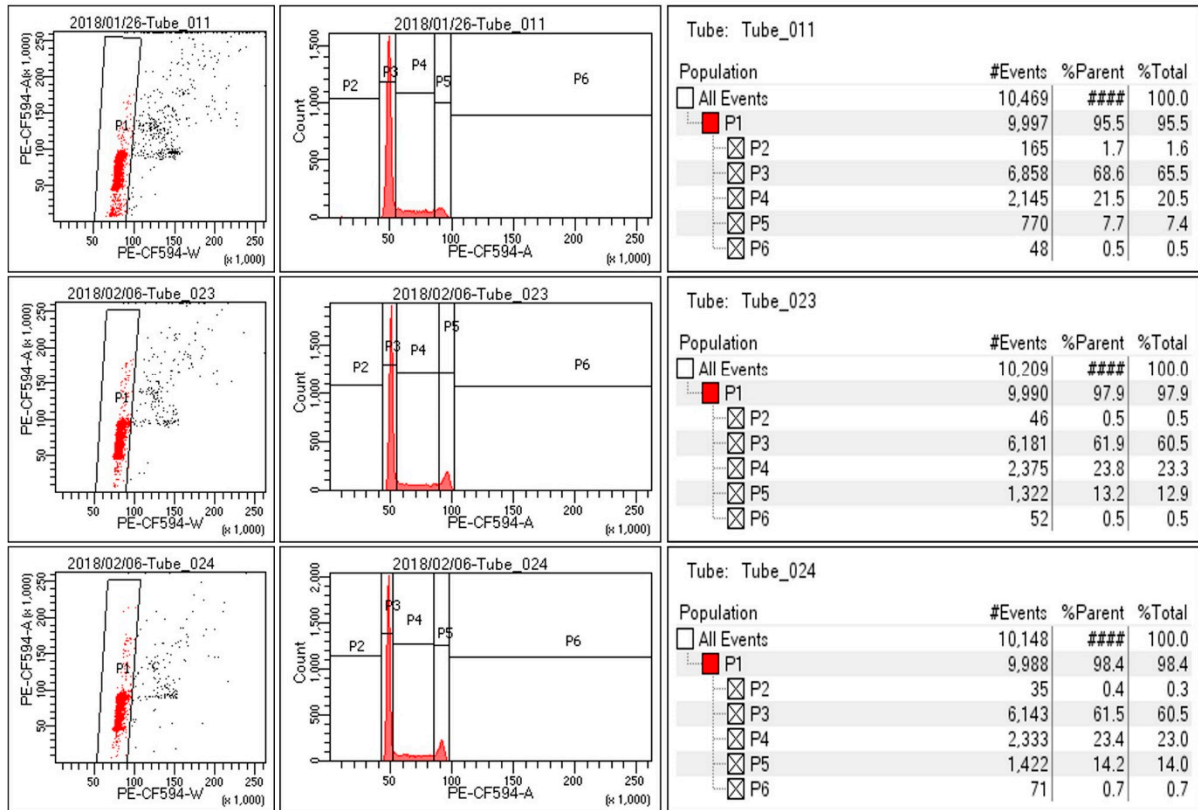

## COLO-205\_DGG20064\_50nM\_6h

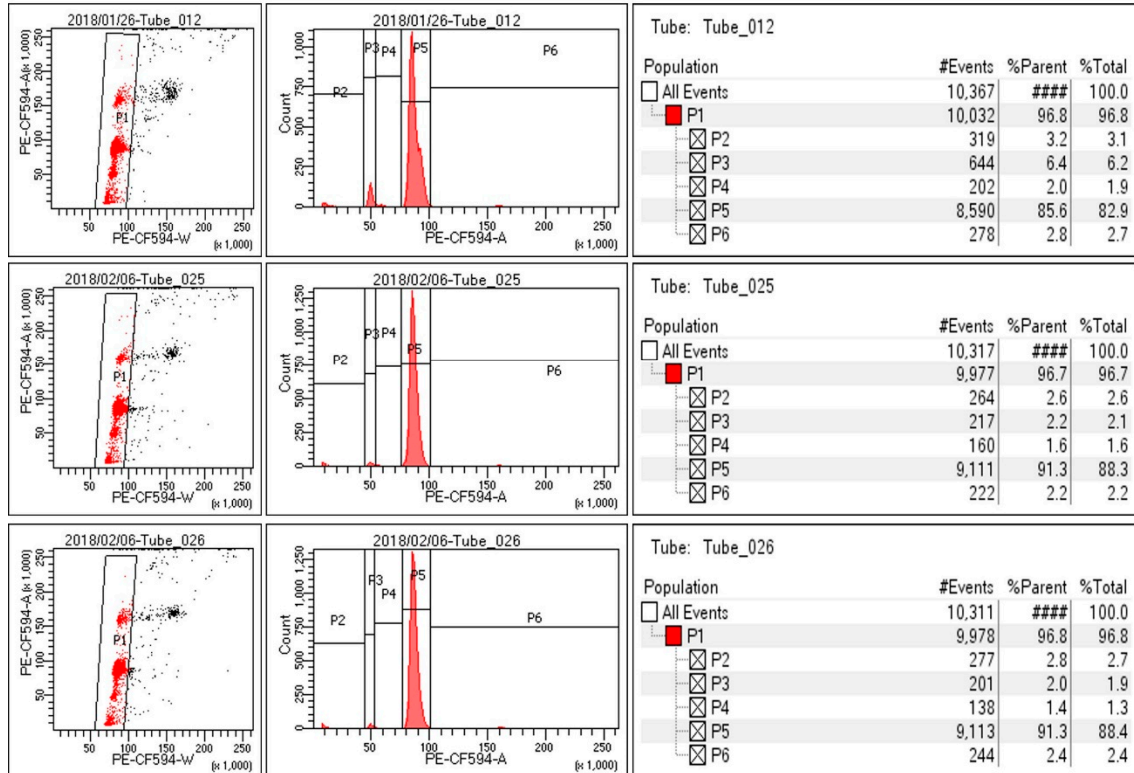

# SW620\_DMSO\_6h

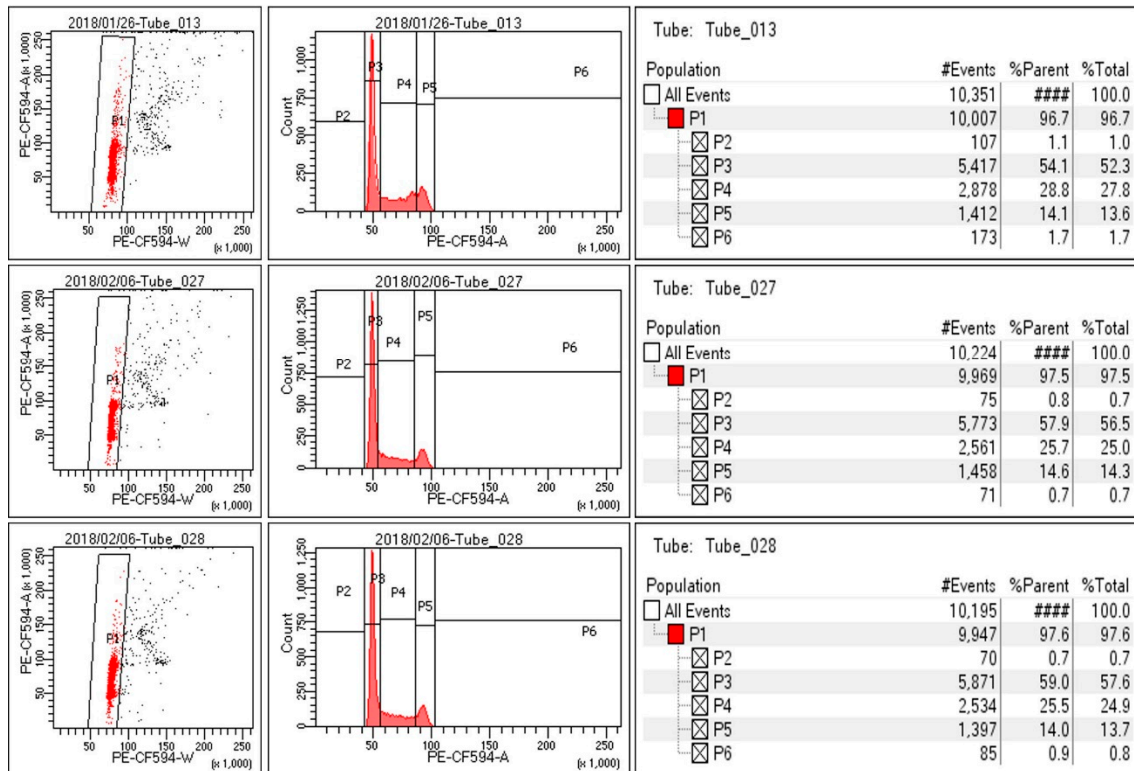

# SW620\_DGG20064\_50nM\_6h

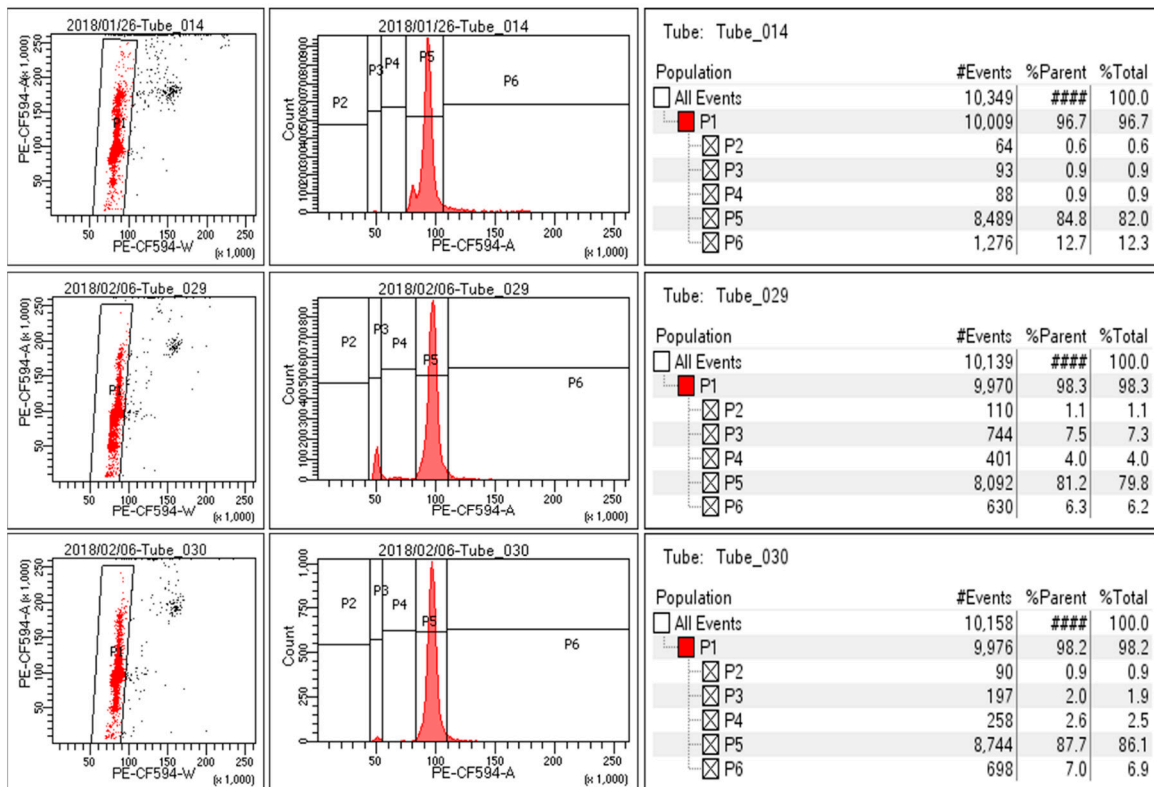

Figure 2A HCT116 and DLD1\_DGG200064 dose-dependent treatment

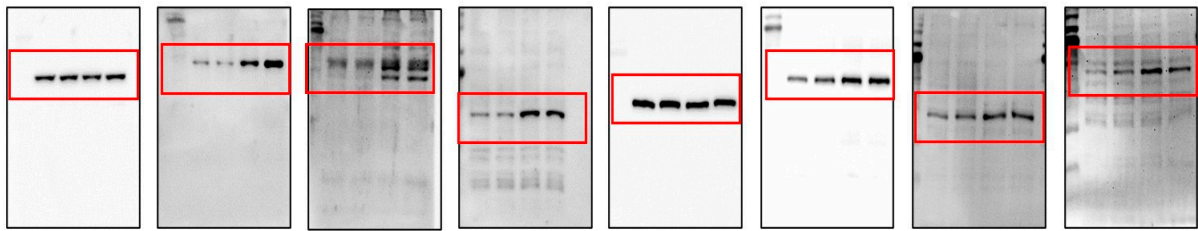

Figure 2C HCT116\_c-Jun siRNA

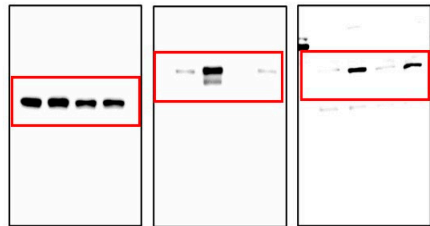

Figure 2D. HCT116\_FBW7 siRNA

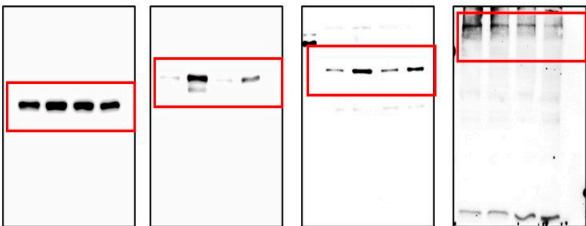

Figure 2C. DLD1\_c-Jun siRNA

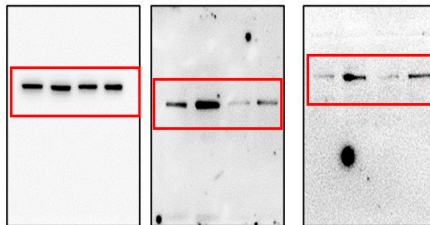

Figure 2D. DLD1\_FBW7 siRNA

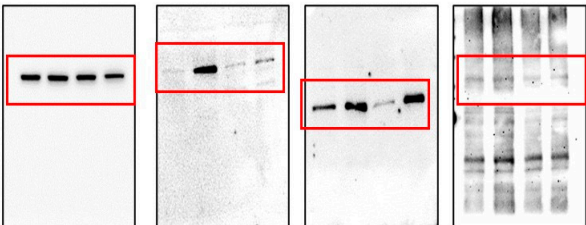

Figure 3.A HCT116

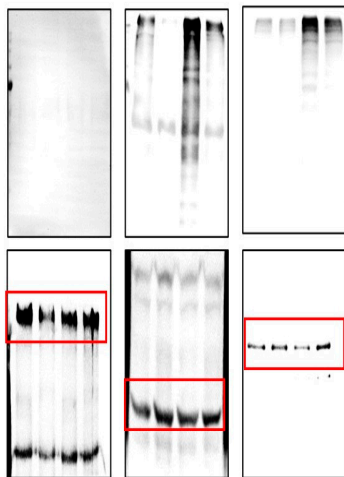

Figure 3.B DLD1

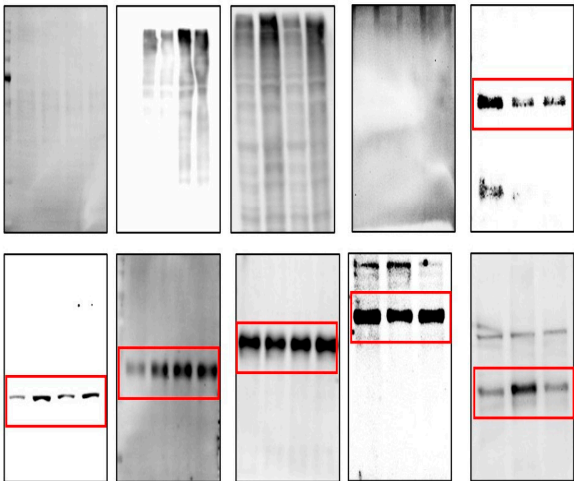

Figure 4.B

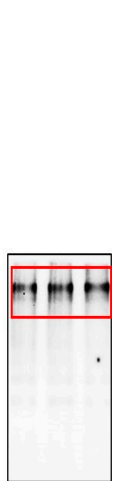



Figure 2A

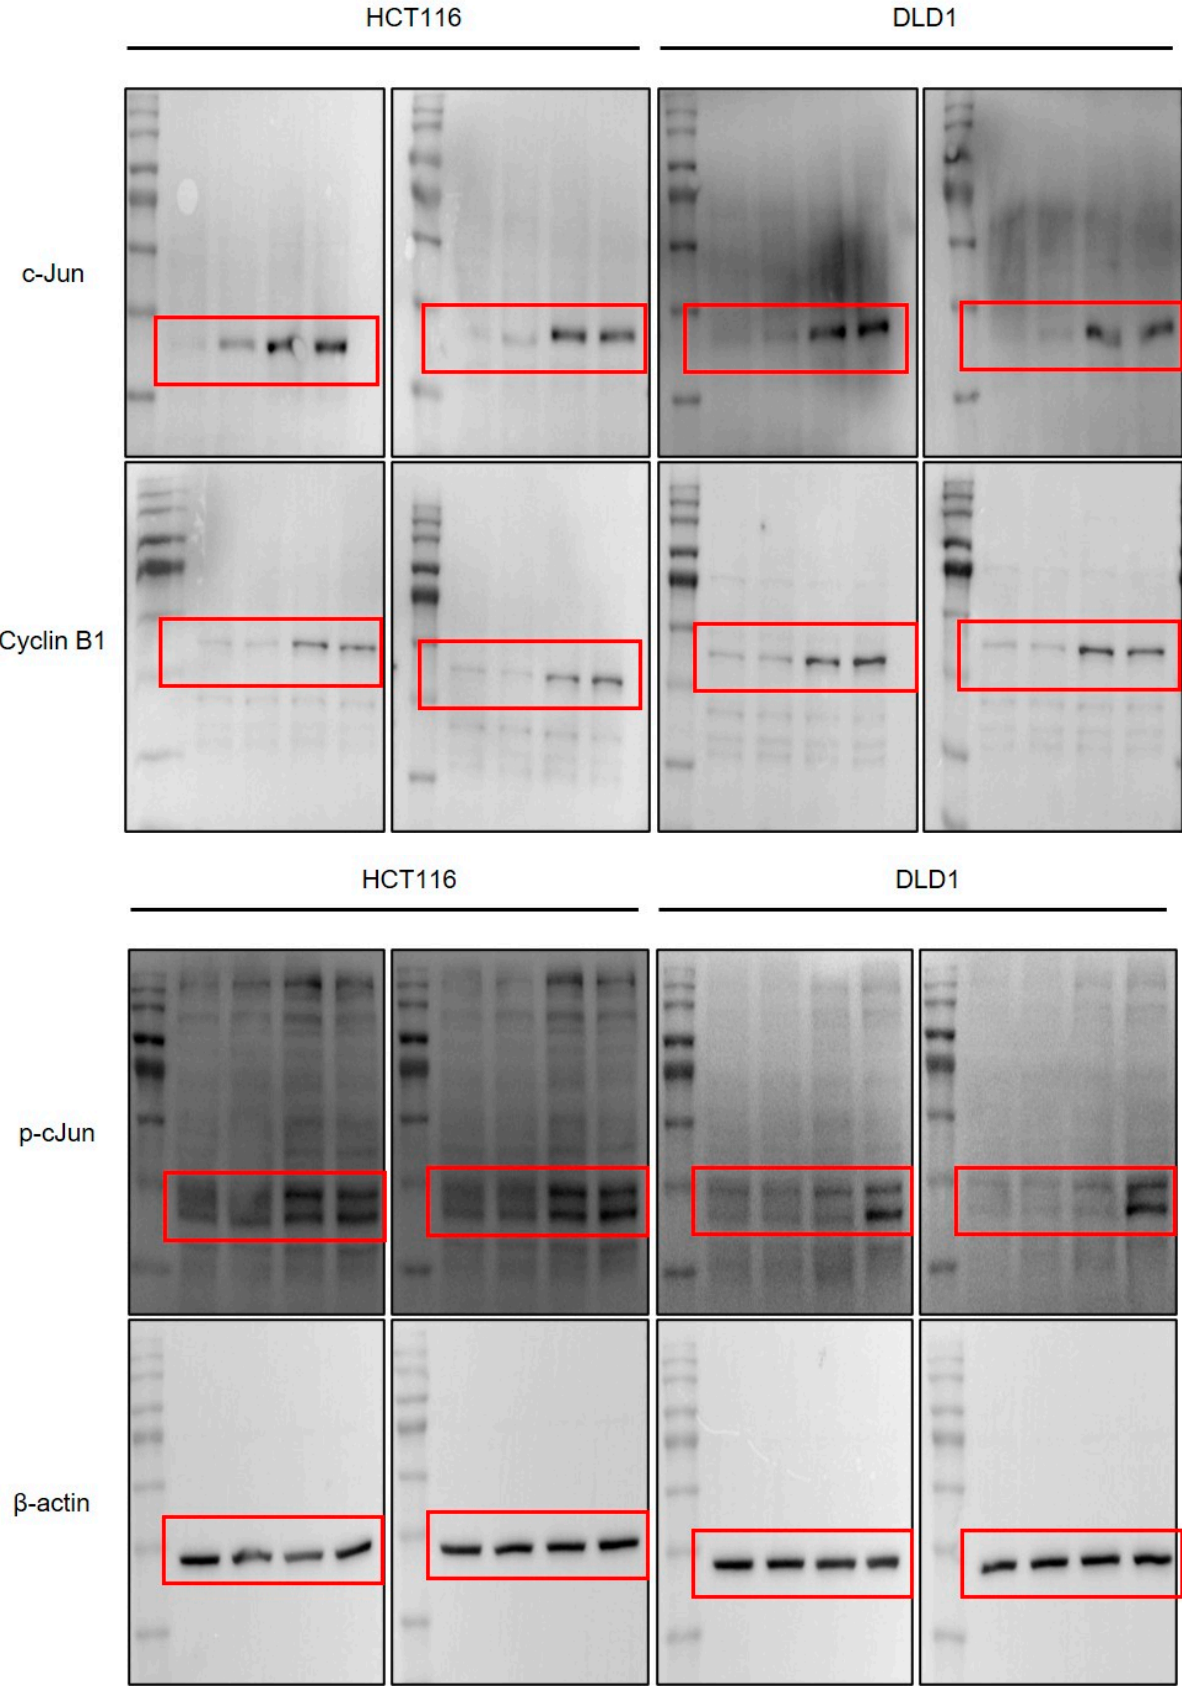

Figure 2B

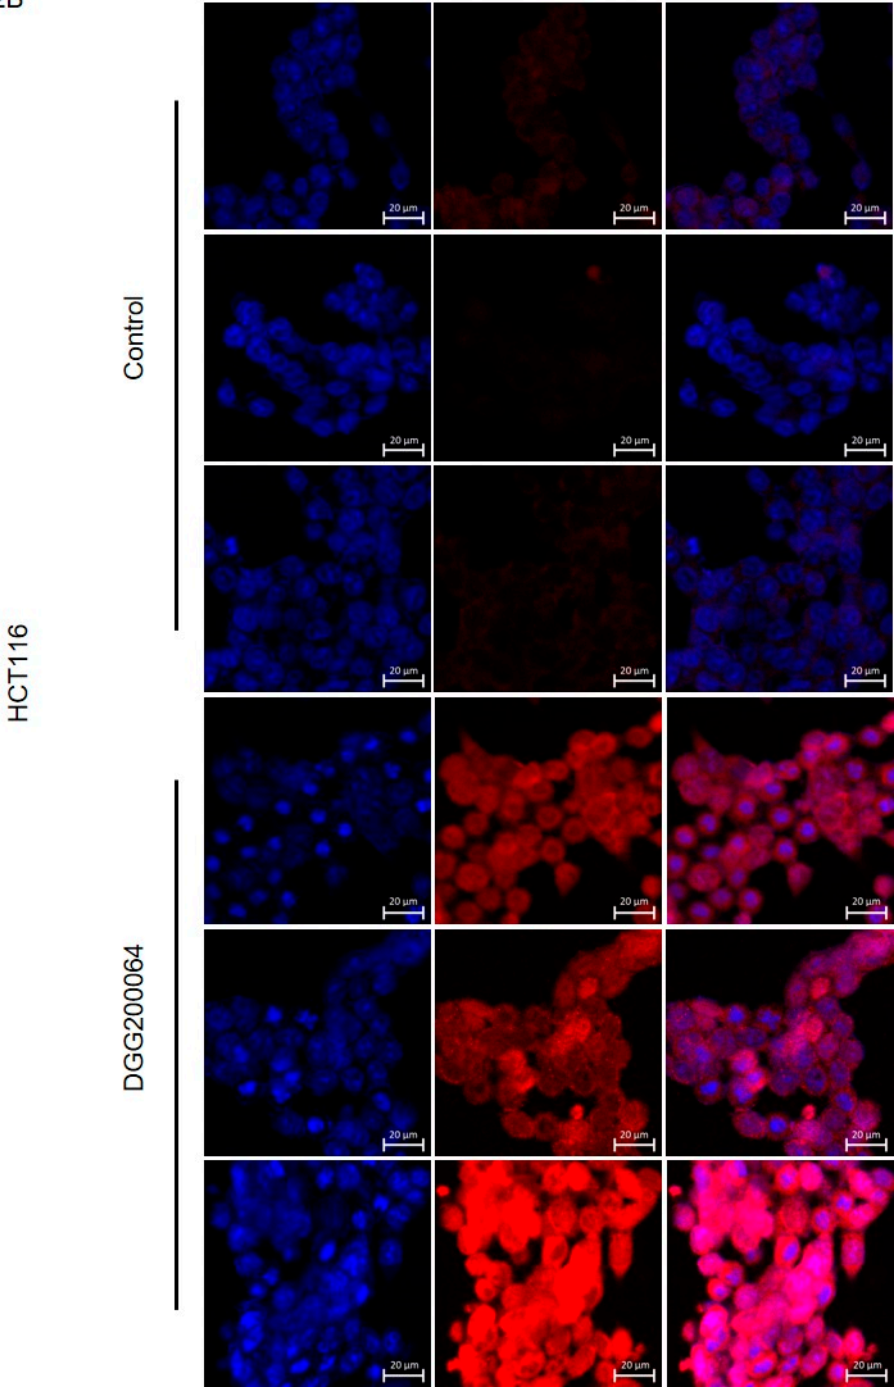

Figure 2C

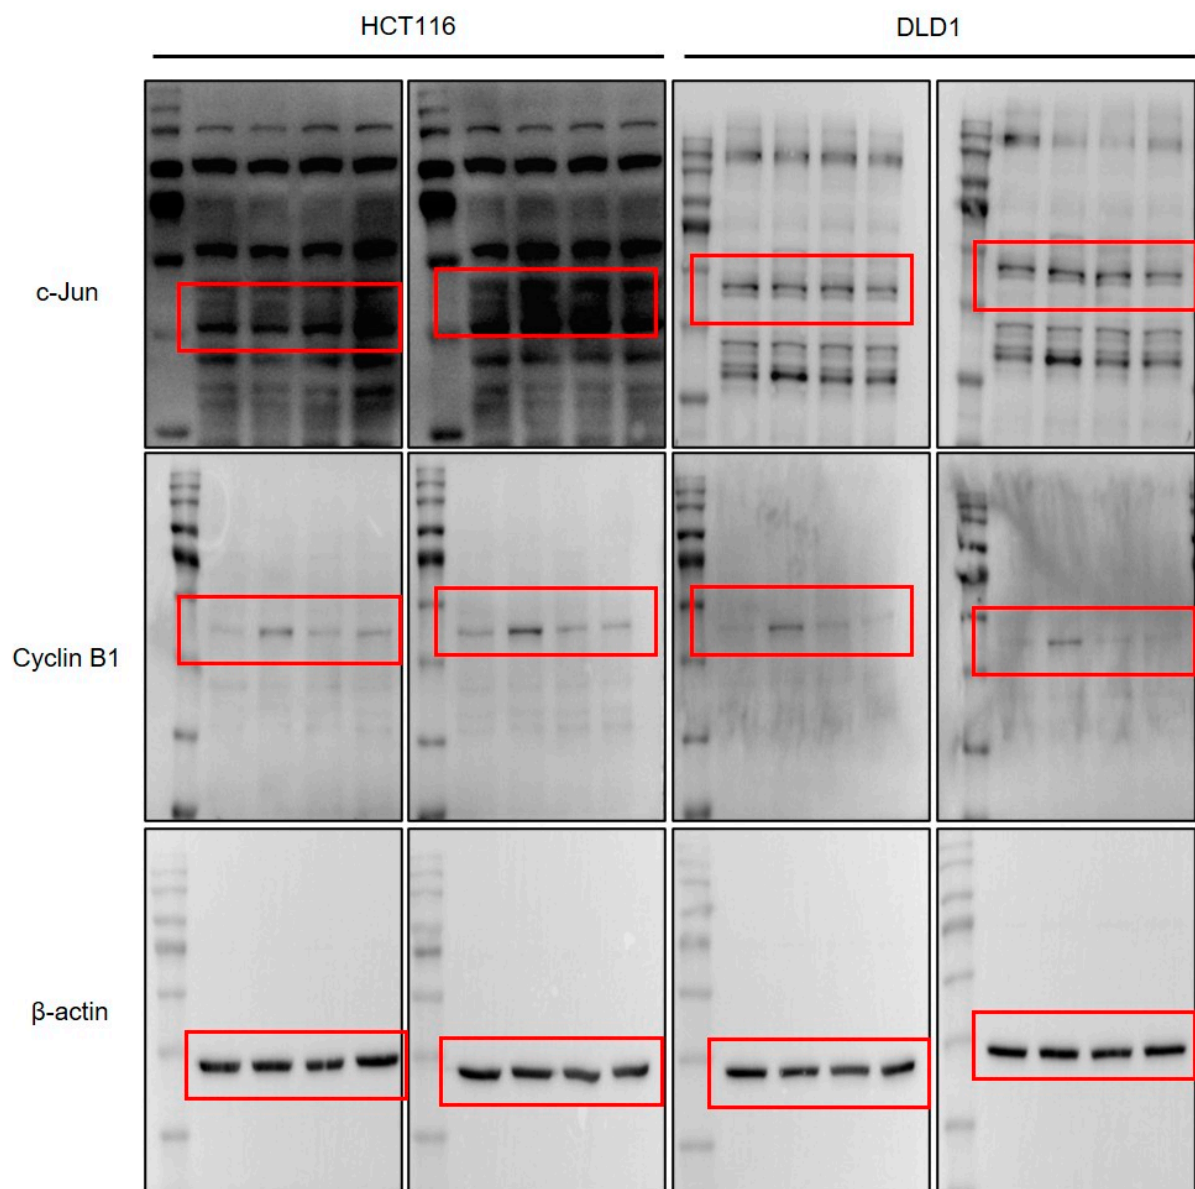

Figure 2D

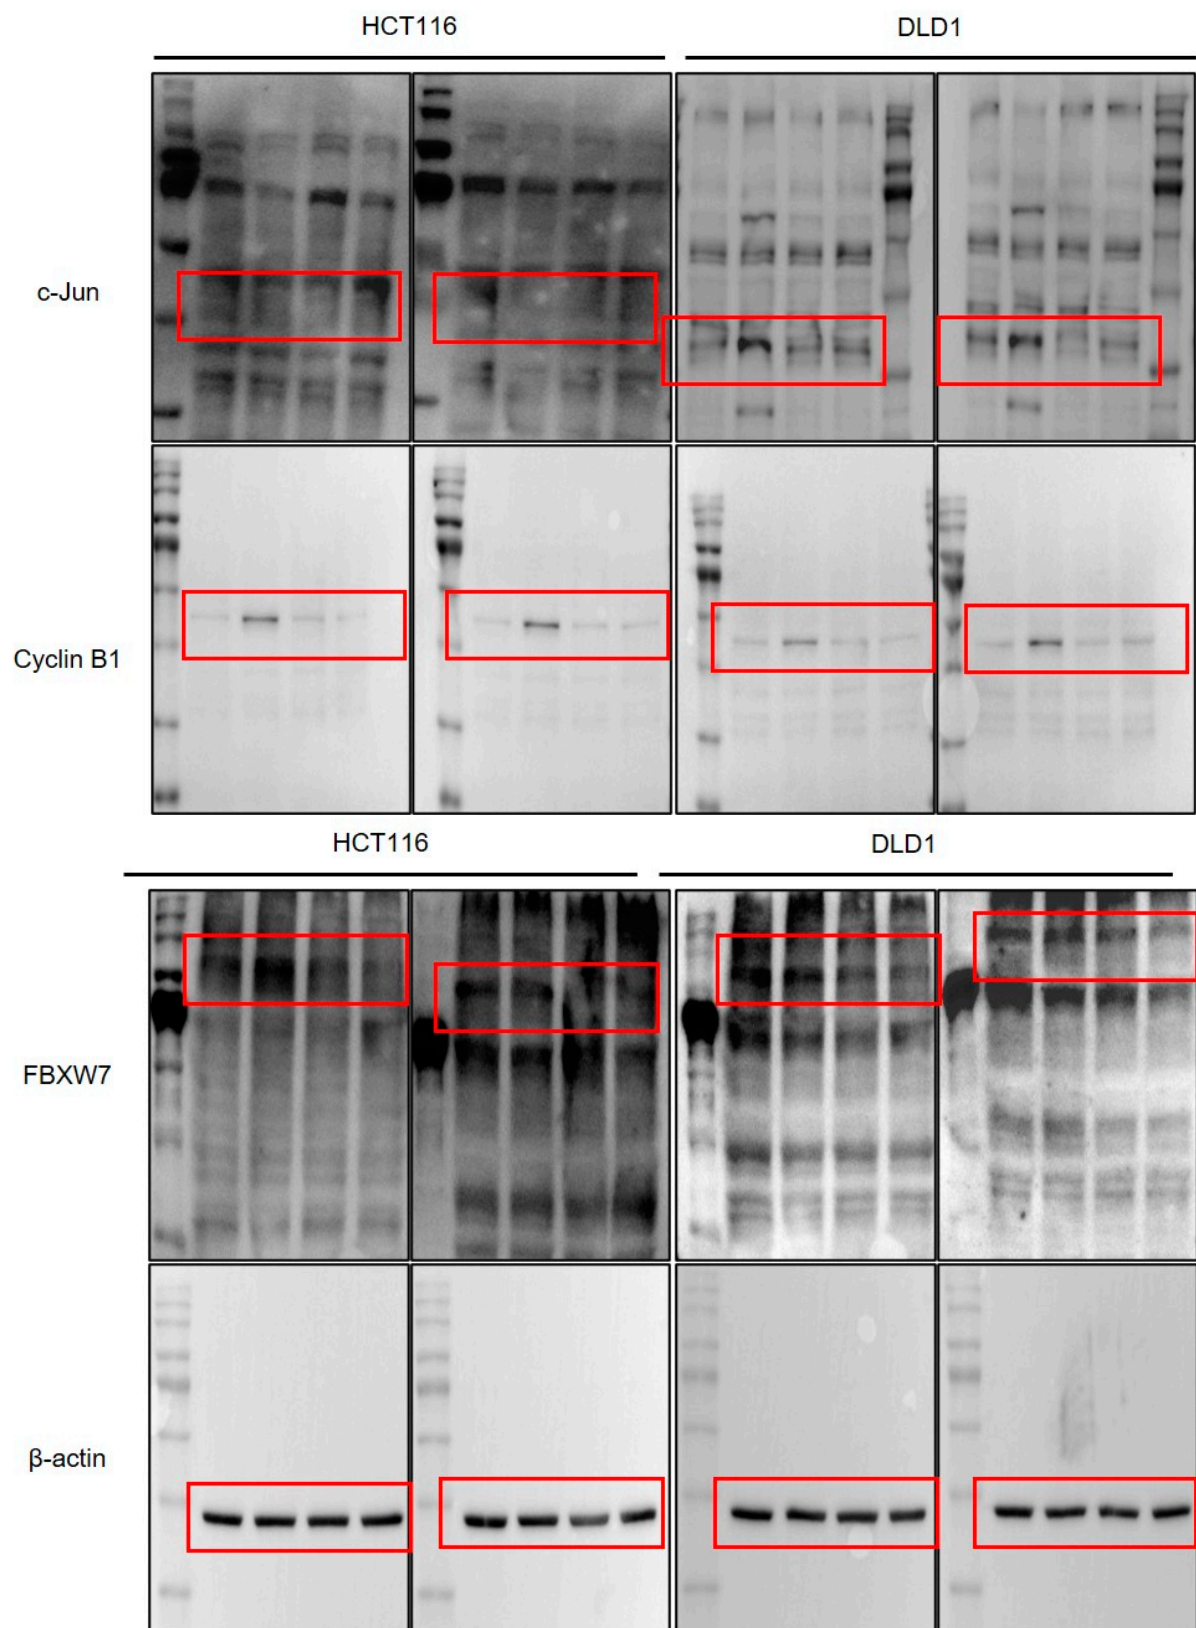



Figure 3

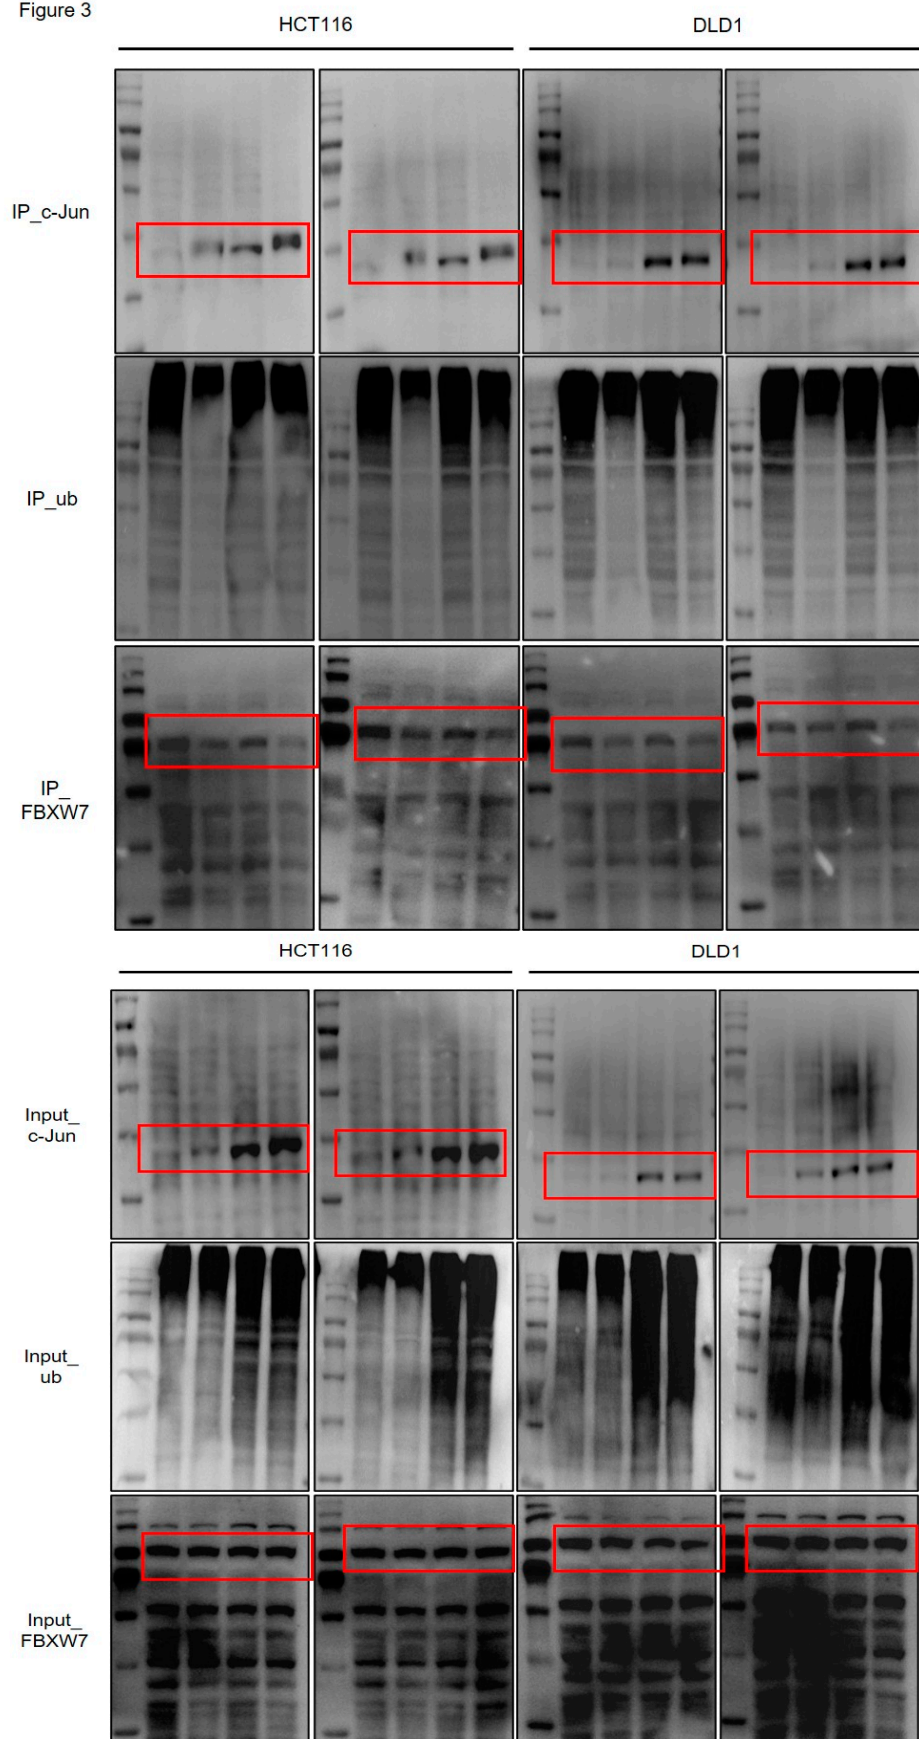

Figure 4

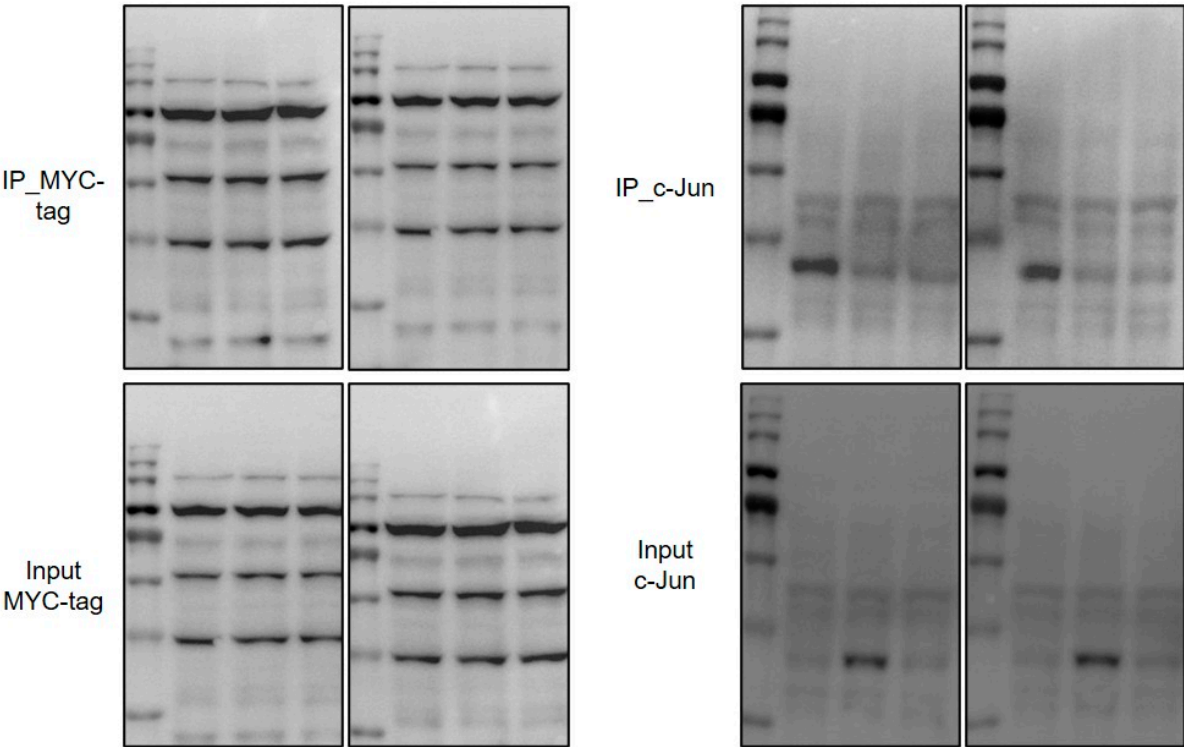

Figure S1 DGG200064 treatment on Colon cancer cells

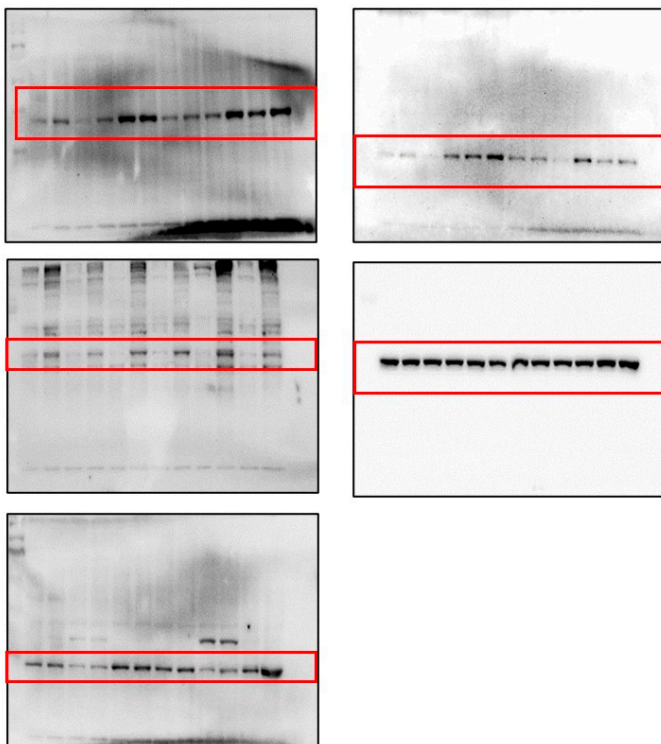

Figure S2 (a) DGG200064 treatment

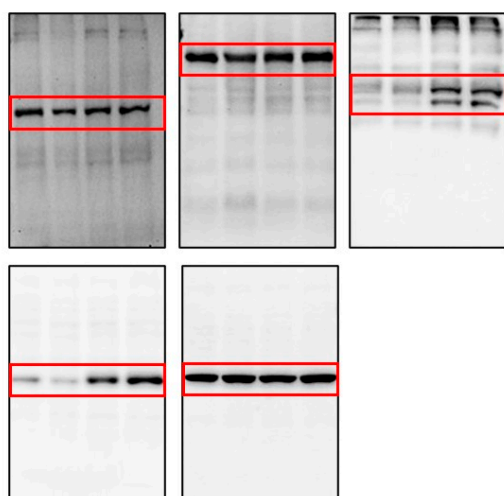

Figure S2 (b) DGG200064 treatment IP with Cyclin E

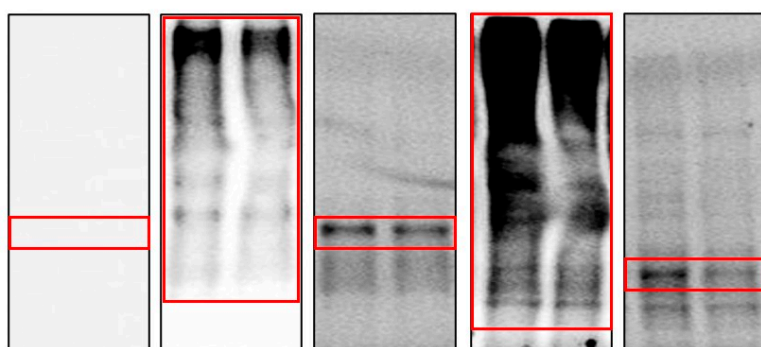

**Table S1. *In vivo* evaluation of the DGG200066 suppressed colon cancer tumor growth against HCT1116 cells.**

| Tumor size (mm <sup>3</sup> ) |                        |          |          |          |          |          |          |          |  |
|-------------------------------|------------------------|----------|----------|----------|----------|----------|----------|----------|--|
|                               |                        | 0        | 5        | 8        | 11       | 14       | 18       | 21       |  |
| 평균                            | Control                | 212.05   | 651.8625 | 794.9103 | 941.4363 | 1074.954 | 1179.893 | 1203.246 |  |
|                               | DGG200064<br>60 mg/kg  | 188.7437 | 298.6004 | 319.7996 | 426.3946 | 508.0443 | 536.6033 | 606.2556 |  |
|                               | DGG200064<br>120 mg/kg | 171.0132 | 246.6181 | 272.2828 | 305.558  | 316.6981 | 327.5194 | 374.4137 |  |
|                               |                        |          |          |          |          |          |          |          |  |
|                               |                        | 0        | 5        | 8        | 11       | 14       | 18       | 21       |  |
| 편차                            | Control                | 116.7022 | 217.3067 | 386.7541 | 407.5402 | 339.1767 | 305.9519 | 236.0849 |  |
|                               | DGG200064<br>60 mg/kg  | 92.02225 | 197.2219 | 196.8343 | 225.5302 | 212.5568 | 279.4415 | 287.8924 |  |
|                               | DGG200064<br>120 mg/kg | 66.22986 | 151.8436 | 156.099  | 182.5079 | 142.3078 | 143.5347 | 99.41429 |  |
|                               |                        |          |          |          |          |          |          |          |  |
| Bodyweight (g)                |                        |          |          |          |          |          |          |          |  |
|                               |                        | 0        | 5        | 8        | 11       | 14       | 18       | 21       |  |
| 평균                            | Control                | 18.16667 | 19       | 20.16667 | 19.16667 | 19.33333 | 20.16667 | 20.5     |  |
|                               | DGG200064<br>60 mg/kg  | 18.66667 | 18.83333 | 19       | 19.16667 | 19.16667 | 19.66667 | 20.33333 |  |
|                               | DGG200064<br>120 mg/kg | 18.33333 | 18.33333 | 18.83333 | 18.66667 | 17.83333 | 18.83333 | 19       |  |
|                               |                        |          |          |          |          |          |          |          |  |
|                               |                        | 0        | 5        | 8        | 11       | 14       | 18       | 21       |  |
| 편차                            | Control                | 0.897527 | 1        | 1.213352 | 0.897527 | 0.745356 | 1.213352 | 0.957427 |  |
|                               | DGG200064<br>60 mg/kg  | 0.745356 | 0.897527 | 1.290994 | 1.213352 | 1.213352 | 1.105542 | 1.247219 |  |
|                               | DGG200064<br>120 mg/kg | 0.471405 | 0.471405 | 0.897527 | 0.942809 | 1.57233  | 1.34371  | 1.632993 |  |

| Tumor size (mm <sup>3</sup> ) |           |          |          |          |          |          |          |          |          |          |          |  |  |  |
|-------------------------------|-----------|----------|----------|----------|----------|----------|----------|----------|----------|----------|----------|--|--|--|
|                               |           | 1        | 4        | 7        | 10       | 13       | 16       | 19       | 22       | 25       | 28       |  |  |  |
| 평균                            | DGG200338 |          |          |          |          |          |          |          |          |          |          |  |  |  |
|                               | 0 mg/kg   | 82.66304 | 151.2889 | 246.1779 | 325.6998 | 463.7817 | 574.7773 | 782.8934 | 893.7176 | 983.6118 | 1080.272 |  |  |  |
|                               | 35 mg/kg  | 80.14855 | 115.5963 | 161.3056 | 173.9752 | 192.7666 | 208.7519 | 227.6788 | 271.1424 | 340.3376 | 339.7049 |  |  |  |
|                               | 70 mg/kg  | 81.25178 | 93.0595  | 115.7923 | 144.3401 | 165.0344 | 180.452  | 190.4336 | 220.6202 | 245.5077 | 243.8313 |  |  |  |
|                               |           |          |          |          |          |          |          |          |          |          |          |  |  |  |
|                               | DGG200338 |          |          |          |          |          |          |          |          |          |          |  |  |  |
| 편차                            | 0 mg/kg   | 48.98778 | 78.38627 | 114.5712 | 116.5257 | 196.5681 | 178.5368 | 301.0909 | 358.0715 | 415.5241 | 402.2574 |  |  |  |
|                               | 35 mg/kg  | 56.85341 | 66.18676 | 80.66902 | 95.0728  | 101.3432 | 102.1129 | 90.66668 | 110.2231 | 94.23366 | 117.5697 |  |  |  |
|                               | 70 mg/kg  | 43.2349  | 53.58528 | 76.1347  | 73.33556 | 99.90373 | 95.57271 | 68.48331 | 65.1613  | 92.32454 | 97.97786 |  |  |  |
|                               |           |          |          |          |          |          |          |          |          |          |          |  |  |  |
| body weight (g)               |           |          |          |          |          |          |          |          |          |          |          |  |  |  |
|                               |           | 1        | 4        | 7        | 10       | 13       | 16       | 19       | 22       | 25       | 28       |  |  |  |
| 평균                            | DGG200338 |          |          |          |          |          |          |          |          |          |          |  |  |  |
|                               | 0 mg/kg   | 19.14286 | 19.42857 | 19.85714 | 19.57143 | 20.14286 | 19.57143 | 20       | 19.71429 | 20       | 19.71429 |  |  |  |
|                               | 35 mg/kg  | 19.42857 | 19.71429 | 19.85714 | 19.57143 | 20.71429 | 20.28571 | 21       | 21.42857 | 22.71429 | 22       |  |  |  |
|                               | 70 mg/kg  | 18.85714 | 18.71429 | 18.28571 | 18       | 19       | 19.85714 | 19.28571 | 19.14286 | 20.57143 | 20       |  |  |  |
|                               |           |          |          |          |          |          |          |          |          |          |          |  |  |  |
|                               | DGG200338 |          |          |          |          |          |          |          |          |          |          |  |  |  |
| 편차                            | 0 mg/kg   | 1.46385  | 1.511858 | 1.345185 | 1.272418 | 1.772811 | 1.511858 | 1.825742 | 2.21467  | 2.645751 | 2.429972 |  |  |  |
|                               | 35 mg/kg  | 1.272418 | 1.496026 | 1.46385  | 1.618347 | 1.380131 | 1.704336 | 1.825742 | 2.225395 | 2.13809  | 1.914854 |  |  |  |
|                               | 70 mg/kg  | 1.46385  | 1.496026 | 1.799471 | 1        | 1.732051 | 1.573592 | 1.496026 | 1.214986 | 1.511858 | 1.632993 |  |  |  |
